# Supplementary material
Source: HighWire-hosted journal article supplement (http://thorax.bmjjournals.com/highwire/filestream/174217/field_highwire_adjunct_files/0/585435Appendix1.pdf)
Supplement: 585435Appendix1.pdf [file 585435Appendix1.pdf]

## APPENDIX 1 Tables of studies included

### Oral and Pharyngeal cancers

#### US studies

##### Prospective cohorts

| ID | Study and Type of ST                                       | Subjects, Setting and years of recruitment                                                                                                     | Sample size and No. of ST users                                                                                                                                     | Measurement of exposure, outcomes and confounders                                                                                                                                                                                                                      | Findings or Results                                                                                                                                                                                                                                                                                                                                                                                | Comments                                                                                                                                                                                                                                                                                                                         |
|----|------------------------------------------------------------|------------------------------------------------------------------------------------------------------------------------------------------------|---------------------------------------------------------------------------------------------------------------------------------------------------------------------|------------------------------------------------------------------------------------------------------------------------------------------------------------------------------------------------------------------------------------------------------------------------|----------------------------------------------------------------------------------------------------------------------------------------------------------------------------------------------------------------------------------------------------------------------------------------------------------------------------------------------------------------------------------------------------|----------------------------------------------------------------------------------------------------------------------------------------------------------------------------------------------------------------------------------------------------------------------------------------------------------------------------------|
| 1  | Zahm et al 1992[104]<br><br>Chewing tobacco and oral snuff | US military veterans, ages 31-84, who held active US government life-insurance policies in 1953 and died by 1980.<br><br>recruited 1954 - 1969 | 293,958 of whom 248,046 provided tobacco use histories on a questionnaire in either 1954 or 1957<br><br>No. of cases who used ST unclear among 43,451 P-Y of ST use | Frequent and infrequent ST use clearly defined. No information on any changes in ST use over time (23-26 years follow-up).<br><br>Measurement of outcomes not described.<br><br>Adjusted for age and calendar time - unclear whether other confounders controlled for. | Significant associations were found among ST users for cancers of buccal cavity (RR = 3.0, 95% CI, 2.0 to 4.5) and pharynx (RR = 8.7, 95% CI 4.1 to 18.3). For both these cancers, frequent users had higher risks than infrequent users (frequent users pharynx RR = 11.2, 95% CI, 5.0 to 25.0; infrequent users pharynx RR 4.5, 95% CI 1.7 to 11.7). RR were adjusted for age and calendar time. | Most veteran users of chewing tobacco or snuff also used other tobacco products. Higher risks found in ex-users than current users, and higher in those who started young, but risk did not increase with duration of use. Items left blank on questionnaire were coded as 'NO' which may underestimate risks.<br><br>Quality: F |

| ID | Study and Type of ST                                            | Subjects, Setting and years of recruitment | Sample size and No. of ST users                                    | Measurement of exposure, outcomes and confounders | Findings or Results                                                                                                                                                                                                                                                                                                                 | Comments                                                                                                                                                                                                                                                       |
|----|-----------------------------------------------------------------|--------------------------------------------|--------------------------------------------------------------------|---------------------------------------------------|-------------------------------------------------------------------------------------------------------------------------------------------------------------------------------------------------------------------------------------------------------------------------------------------------------------------------------------|----------------------------------------------------------------------------------------------------------------------------------------------------------------------------------------------------------------------------------------------------------------|
| 2  | Bjelke and Schuman, 1982[105]<br>Chewing tobacco and snuff      | Cohorts of US and Norwegian men            | 16,930 US men and 12,945 Norwegian Men<br><br>ST users: not stated | Abstract only – no information                    | Increases in risk of death for cancers of buccal cavity, pharynx, oesophagus (RR ranges from 2.6 to 3.1).                                                                                                                                                                                                                           | Abstract only – 95% CI not given[5]<br><br>Quality: F                                                                                                                                                                                                          |
| 3  | Winn et al. 1982[106]<br><br>ST use (chewing tobacco and snuff) | 16-year follow-up of US veterans           | Approximately 300,000<br><br>ST Users: 951                         | Abstract only – no details                        | In the absence of smoking, ST related SMRs <sup>1</sup> for heart disease and for malignant neoplasms were approximately 100 (no deaths from oral or pharyngeal cancer were observed). SMRs were higher for cancer of digestive system (137), cancer of oesophagus (228), cancer of stomach (151), pancreas (165), and liver (281). | Abstract only - small numbers for some outcomes (only one death from cancer of oesophagus). Among chewers who were very light smokers, cancer risk was raised 8-fold for pharynx and 1.5 for oral cavity (but light smoking is not defined).<br><br>Quality: F |

---

<sup>1</sup> Standardised Mortality Ratios

**Table 1.1.2 Case-control studies**

| <b>ID</b> | <b>Study Type of ST</b>                              | <b>Subjects, Setting and years of recruitment</b>                                                                                                                                                                                                                                                                                                                                | <b>Sample size No. of ST users</b>                              | <b>Measurement of exposure, outcomes and confounders</b>                                                                                                                                                                                                  | <b>Findings or Results</b>                                                                                                        | <b>Comments</b>                                                                                                                                                                                                                                                                                                                                      |
|-----------|------------------------------------------------------|----------------------------------------------------------------------------------------------------------------------------------------------------------------------------------------------------------------------------------------------------------------------------------------------------------------------------------------------------------------------------------|-----------------------------------------------------------------|-----------------------------------------------------------------------------------------------------------------------------------------------------------------------------------------------------------------------------------------------------------|-----------------------------------------------------------------------------------------------------------------------------------|------------------------------------------------------------------------------------------------------------------------------------------------------------------------------------------------------------------------------------------------------------------------------------------------------------------------------------------------------|
| 4         | Schwartz et al. 1998[88]<br><br>ST use not described | Patients aged 18-65 with histologically confirmed squamous cell cancer (SCC) of oral cavity, identified through Cancer Surveillance System, part of NCI SEER <sup>2</sup> Program, Controls were residents of same regions and same age with no history of oral cancer, identified through random digit dialling. King Pierce and Snohomish counties, Washington State 1990-1995 | 284 cases, 477 controls<br><br>19 cases and 28 controls used ST | ST measurement not described<br><br>Sites included clearly stated (tongue, gum, floor of mouth, other and unspecified parts of mouth, tonsils or oropharynx) but ICD codes not listed. All cases confirmed by histology.<br><br>No control of confounding | Among men, prior ST use was similar between cases and controls (OR = 1.0, 95% CI, 0.4 to 2.3). Only 1 female (a control) used ST. | Main focus of study is sexual history, oral sex, and HPV infection, small numbers used ST and any effect was probably overwhelmed by the risk of cigarette smoking (a high proportion of cases were heavy smokers).<br><br>Response rates were not high (63% of cases, 65% of controls) due to a combination of death and refusal.<br><br>Quality: F |

<sup>2</sup> National Cancer Institute, Surveillance, Epidemiology and End Results Program

| <b>ID</b> | <b>Study Type of ST</b>                                          | <b>Subjects, Setting and years of recruitment</b>                                                                                                                                                                                        | <b>Sample size No. of ST users</b>                                                                                        | <b>Measurement of exposure, outcomes and confounders</b>                                                                                                                                                                                                                                                                         | <b>Findings or Results</b>                                                                         | <b>Comments</b>                                                                                                                                                                                                        |
|-----------|------------------------------------------------------------------|------------------------------------------------------------------------------------------------------------------------------------------------------------------------------------------------------------------------------------------|---------------------------------------------------------------------------------------------------------------------------|----------------------------------------------------------------------------------------------------------------------------------------------------------------------------------------------------------------------------------------------------------------------------------------------------------------------------------|----------------------------------------------------------------------------------------------------|------------------------------------------------------------------------------------------------------------------------------------------------------------------------------------------------------------------------|
| 5         | Muscat et al. 1996[89]<br><br>Oral snuff use and chewing tobacco | Patients with oral cancers attending hospitals in Chicago, Hines, Detroit, New York, Philadelphia<br>Controls were patients admitted for conditions unrelated to tobacco use, matched by age, sex, race, date of admission.<br>1981-1990 | 1009 cases, 923 controls<br>Snuff use – 11 cases, 11 controls. Chewing tobacco – 38 cases and 33 controls (none in women) | ST use not main focus of paper – no information on possible dose-response relationships.<br><br>Oral cavity cancer – sites included clearly defined (ICD 9 141, 143-6, 148-9), confirmed histologically and newly diagnosed. Salivary gland (ICD 142) and nasopharynx.<br><br>Does not state whether confounders controlled for. | Oral snuff use and chewing tobacco were unrelated to oral cancer risk                              | ICD 147 excluded.<br>Response rates high (91% of cases, 97% of controls).<br><br>Quality: F                                                                                                                            |
| 6         | Marshall et al 1992[91]<br><br>Snuff and chewing tobacco         | Patients with oral cavity cancers attending 20 major hospitals of 3 western New York counties of Erie, Niagara & Monroe<br>Neighbourhood controls, matched on age, race and sex.<br><br>1975 – 1983                                      | 290 cases, 290 controls<br><br>No. of ST users not stated                                                                 | No description or definition of ST use.<br><br>Sites included stated (tongue, oropharynx, floor of mouth, pharynx or hypopharynx), confirmed by pathology.<br><br>Unclear whether confounders controlled for.                                                                                                                    | A risk is associated with chewing tobacco, but it was insignificant, with very few people exposed. | No information presented on numbers using ST (very few), and no information on possible dose-response relationships. High level of non-response (only 60% of cases included, 41% of controls contacted).<br>Quality: F |

| <b>ID</b> | <b>Study Type of ST</b>                                     | <b>Subjects, Setting and years of recruitment</b>                                                                                                                 | <b>Sample size No. of ST users</b>                                                                                                      | <b>Measurement of exposure, outcomes and confounders</b>                                                                                                                                                         | <b>Findings or Results</b>                                                                                                                                                                      | <b>Comments</b>                                                                                              |
|-----------|-------------------------------------------------------------|-------------------------------------------------------------------------------------------------------------------------------------------------------------------|-----------------------------------------------------------------------------------------------------------------------------------------|------------------------------------------------------------------------------------------------------------------------------------------------------------------------------------------------------------------|-------------------------------------------------------------------------------------------------------------------------------------------------------------------------------------------------|--------------------------------------------------------------------------------------------------------------|
| 7         | Kabat et al 1994[90]<br>Chewing tobacco, no further details | Patients with oral cancers, 8 cities in US,<br><br>Hospital-based controls were patients with diseases not thought related to tobacco or alcohol<br><br>1977-1990 | 1560 cases and 2948 controls<br>Among never-smoking males, 4 out of 82 cases were regular chewers compared with 10 out of 448 controls. | ST use was not main focus of study, use is not defined, no information on dose-response relationships.<br><br>Sites included clearly defined and confirmed histologically<br><br>Limited control for confounding | Among never-smokers, crude OR for oral and pharyngeal cancers in tobacco chewers versus non chewers:<br>(OR = 2.25, 95% CI 0.69 to 7.34) for men<br>(OR = 34.5, 95% CI 8.49 to 140.1) for women | Only a small number of cases and controls used chewing tobacco without concurrent smoking.<br><br>Quality: F |

| ID | Study Type of ST                                      | Subjects, Setting and years of recruitment                                                                                                                                                                               | Sample size No. of ST users                                                                     | Measurement of exposure, outcomes and confounders                                                                                                                                                                                                                                         | Findings or Results                                                                                                                                                                                | Comments                                                                                                                                                                                                                                                                                                                                                                                                                                                     |
|----|-------------------------------------------------------|--------------------------------------------------------------------------------------------------------------------------------------------------------------------------------------------------------------------------|-------------------------------------------------------------------------------------------------|-------------------------------------------------------------------------------------------------------------------------------------------------------------------------------------------------------------------------------------------------------------------------------------------|----------------------------------------------------------------------------------------------------------------------------------------------------------------------------------------------------|--------------------------------------------------------------------------------------------------------------------------------------------------------------------------------------------------------------------------------------------------------------------------------------------------------------------------------------------------------------------------------------------------------------------------------------------------------------|
| 8  | Mashberg et al. 1993[45]<br>Chewing tobacco and snuff | <p>Patients admitted to Department of Veterans Affairs Medical Centre, New Jersey.</p> <p>Controls were patients without evidence of cancer or dysplasia of pharynx, larynx, lung or oesophagus.</p> <p>1972 to 1983</p> | <p>359 cases 2280 controls</p> <p>52 cases, 255 controls ever used chewing tobacco or snuff</p> | <p>No information on measurements of ST use</p> <p>Sites included not clearly defined (oral cavity and oropharynx), though all cases were incident and confirmed histologically.</p> <p>Important confounders were considered (including age, race, occupation, smoking and alcohol),</p> | <p>No increased risk of oral cancer found for use of snuff (OR 0.8, 95% CI 0.4 to 1.9) or chewing tobacco (OR 1.0, 95% CI 0.7 to 1.4). No trend in OR according to duration of tobacco chewing</p> | <p>Not a complete case series, states that "a large majority" of patients were examined.</p> <p>Limited to males only.</p> <p>Possible residual confounding for alcohol and tobacco smoking – referent category is "minimal smokers" which includes lifetime non-smokers, occasional smokers, smokers of 1-5 cigarette equivalent per day as there were too few non-smokers. Similar issues exist with control of alcohol consumption.</p> <p>Quality: A</p> |

| <b>ID</b> | <b>Study Type of ST</b>                                               | <b>Subjects, Setting and years of recruitment</b>                                                                                                                                          | <b>Sample size No. of ST users</b>                                                       | <b>Measurement of exposure, outcomes and confounders</b>                                                                                                                                                                                                                        | <b>Findings or Results</b>                                                                                                                                                                                             | <b>Comments</b>                                                                                   |
|-----------|-----------------------------------------------------------------------|--------------------------------------------------------------------------------------------------------------------------------------------------------------------------------------------|------------------------------------------------------------------------------------------|---------------------------------------------------------------------------------------------------------------------------------------------------------------------------------------------------------------------------------------------------------------------------------|------------------------------------------------------------------------------------------------------------------------------------------------------------------------------------------------------------------------|---------------------------------------------------------------------------------------------------|
| 9         | Blot et al 1988[107]<br>Chewing tobacco and snuff, no further details | Oral and pharyngeal cancers recorded in the Cancer Registry of Atlanta, Los Angeles, Santa Clara, and San Mateo, centres south of San Francisco-Oakland and state of New Jersey. 1984-1985 | 1114 cases, 1268 controls<br>Males: 46 cases, 59 controls<br>Females: 6 cases 4 controls | ST use is not defined, no information on dose-response relationships,<br><br>Sites included clearly defined (ICD 9 141-149) excl 142 and 147 and confirmed pathologically.<br><br>Limited control of confounding (adjusted for age, race, study location and respondent status) | Among females who were non-smokers, (crude OR= 6.2, 95% CI 1.9 to 19.8)<br><br>Primarily snuff users, and all cases in oral cavity. No difference in proportion of ST users in male cases and controls (OR not given). | ST use was not main focus of study, small number of cases and controls used ST.<br><br>Quality: F |

| ID | Study Type of ST                                           | Subjects, Setting and years of recruitment                                                                                                                                                                                                              | Sample size No. of ST users                                            | Measurement of exposure, outcomes and confounders                                                                                                                                                                                                                                                                                                               | Findings or Results                                                                                                                                                                                                                                                                                                                                                                                                                                                                                                                                                                                                                 | Comments                                                                                                                                                                                                                    |
|----|------------------------------------------------------------|---------------------------------------------------------------------------------------------------------------------------------------------------------------------------------------------------------------------------------------------------------|------------------------------------------------------------------------|-----------------------------------------------------------------------------------------------------------------------------------------------------------------------------------------------------------------------------------------------------------------------------------------------------------------------------------------------------------------|-------------------------------------------------------------------------------------------------------------------------------------------------------------------------------------------------------------------------------------------------------------------------------------------------------------------------------------------------------------------------------------------------------------------------------------------------------------------------------------------------------------------------------------------------------------------------------------------------------------------------------------|-----------------------------------------------------------------------------------------------------------------------------------------------------------------------------------------------------------------------------|
| 10 | Stockwell and Lyman, 1986[46]<br><br>ST use not described. | All individuals with head and neck cancers first diagnosed among Florida residents in 1982. Controls were all state residents diagnosed with colon carcinoma, rectal carcinoma, cutaneous melanoma, or endocrine neoplasms during the same time period. | 2,351 cases<br>8285 controls<br><br>ST users: 18 cases and 31 controls | Types of ST used not defined clearly.<br><br>Sites included clearly stated and patients identified using a population-based state-wide cancer registry.<br><br>States that important confounders were considered (age, race, sex and tobacco use), but only the 'primary' tobacco product used was recorded. No information on quantity or duration of ST used. | Statistically significant adjusted ORs for cancer of mouth and gum (11.2, 95% CI 4.1 to 30.7), larynx (OR = 7.3, 95% CI = 2.9 to 18.3), and salivary gland (OR = 5.3, 95% CI 1.2 to 23.4). ORs for other sites were raised, but not statistically significant e.g. pharynx OR = 4.1, (95% CI = 0.9 to 18.0), nasopharynx OR = 5.3, (95% CI 0.7 to 41.6), nasal cavity/ paranasal sinuses OR = 3.3 (95% CI 0.4 to 25.9), tongue OR = 2.3 (95% CI 0.2 to 12.9). For mouth and gum, oropharynx, larynx and salivary glands, risks associated with ST use are greater than those observed among smokers of up to 20 cigarettes per day. | Data available for almost all cases and controls in the cancer registry, but the completeness of this source is uncertain. Number of ST users is relatively small, hence ORs are not precisely estimated.<br><br>Quality: A |

| ID | Study Type of ST                    | Subjects, Setting and years of recruitment                                                                                                                                                                                                                                                                                                                                                                                                            | Sample size No. of ST users                                                                                                                                                                    | Measurement of exposure, outcomes and confounders                                                                                                                    | Findings or Results                                                                             | Comments                                                                                                                                                                                                                                                                                                                                         |
|----|-------------------------------------|-------------------------------------------------------------------------------------------------------------------------------------------------------------------------------------------------------------------------------------------------------------------------------------------------------------------------------------------------------------------------------------------------------------------------------------------------------|------------------------------------------------------------------------------------------------------------------------------------------------------------------------------------------------|----------------------------------------------------------------------------------------------------------------------------------------------------------------------|-------------------------------------------------------------------------------------------------|--------------------------------------------------------------------------------------------------------------------------------------------------------------------------------------------------------------------------------------------------------------------------------------------------------------------------------------------------|
| 11 | Young et al. 1986[92]<br>Not stated | 12 hospitals and 22 active physicians contributing to a computerised central database – the Wisconsin Head and Neck Cancer Network over an 18 month period (not specified).<br><br>Two control series selected from the same cancer network (1) patients with cancer of head and neck sites not thought related to tobacco use (salivary gland, nasopharynx, paranasal sinus sites); (2) patients with cancer of larynx, a known smoking-related site | 623 total cases, 202 oral cavity, 78 oropharynx, 37 hypopharynx, 127 with cancers not thought related to tobacco, 179 with cancer of larynx<br><br>Approx. 16 males, 1 female had ever used ST | Measurement of exposure not described.<br><br>Sites included not clearly described – oral cavity, oropharyngeal and hypopharyngeal.<br><br>No control of confounding | No statistically significant difference between cancer sites on use of snuff or chewing tobacco | Control selection may dilute risk estimates (only includes those with other head and neck cancers or a known smoking related site). Response rates unclear, only small numbers used ST and any effect probably overwhelmed by cigarette smoking, which was very common (71% of males and 54% of females were current smokers).<br><br>Quality: F |

| <b>ID</b> | <b>Study Type of ST</b>                                 | <b>Subjects, Setting and years of recruitment</b>                                           | <b>Sample size No. of ST users</b>                                                                                                                                     | <b>Measurement of exposure, outcomes and confounders</b>                                                                                                                                                                                                                                                      | <b>Findings or Results</b>                                                                                                                               | <b>Comments</b>                                                                                                                                                                                              |
|-----------|---------------------------------------------------------|---------------------------------------------------------------------------------------------|------------------------------------------------------------------------------------------------------------------------------------------------------------------------|---------------------------------------------------------------------------------------------------------------------------------------------------------------------------------------------------------------------------------------------------------------------------------------------------------------|----------------------------------------------------------------------------------------------------------------------------------------------------------|--------------------------------------------------------------------------------------------------------------------------------------------------------------------------------------------------------------|
| 12        | Wynder et al 1983[108]<br><br>Chewing tobacco and snuff | Part of a large on-going study of tobacco related disease interviewed between 1977 and 1980 | 571 cases, 571 controls<br>Males 37 cases and 37 controls chewed tobacco, 3 cases and 7 controls dipped snuff. Females – no chewing tobacco users, 2 cases used snuff. | No description or definition of ST use.<br><br>Cases have histologically confirmed diagnosis of oral and pharyngeal cancer.<br><br>Some control of confounding by matching (patients without tobacco-related disease on basis of age, sex, race, hospital and hospital status private, semiprivate, or ward). | No associations found in males.<br><br>Two female cases reported using snuff for more than 30 years in contrast to no snuff users among female controls. | Part of larger study previously published (see Wynder and Stellman 1977 below).<br><br>Main focus of study is mouthwash use, with little information on ST use and small numbers of users.<br><br>Quality: F |

| ID | Study Type of ST                                                         | Subjects, Setting and years of recruitment                                                                                                                                                                                                                                                                                                                                                                                                                 | Sample size No. of ST users                                               | Measurement of exposure, outcomes and confounders                                                                                                                                                                                                                                                                                                                      | Findings or Results                                                                                                                                                                                                                                                                                                                                                                                                                                                                                                                                                | Comments                                                                                                                                                                                                                                                                                 |
|----|--------------------------------------------------------------------------|------------------------------------------------------------------------------------------------------------------------------------------------------------------------------------------------------------------------------------------------------------------------------------------------------------------------------------------------------------------------------------------------------------------------------------------------------------|---------------------------------------------------------------------------|------------------------------------------------------------------------------------------------------------------------------------------------------------------------------------------------------------------------------------------------------------------------------------------------------------------------------------------------------------------------|--------------------------------------------------------------------------------------------------------------------------------------------------------------------------------------------------------------------------------------------------------------------------------------------------------------------------------------------------------------------------------------------------------------------------------------------------------------------------------------------------------------------------------------------------------------------|------------------------------------------------------------------------------------------------------------------------------------------------------------------------------------------------------------------------------------------------------------------------------------------|
| 13 | Winn et al. 1981[47]<br>Oral snuff and chewing tobacco, defined in paper | <p>Female patients with oral and pharyngeal cancers identified by discharge diagnoses from 5 North Carolina Hospitals (n=156) and from death certificate diagnoses (n=99)</p> <p>Hospital controls excluding those with oral neoplasm and other pharyngeal diseases.</p> <p>Matched on age, source of ascertainment (hospital or death certificate), county of residence at time of hospital admission or usual residence at death</p> <p>1976 to 1978</p> | <p>255 cases 502 controls</p> <p>ST users: 107 cases and 124 controls</p> | <p>ST use clearly described and defined.</p> <p>Sites included clearly stated – ICD 8 141, 143-146, 148-149.</p> <p>Control of confounding was good (age, education, religion, cigarette smoking, alcohol consumption, region of residence, source of ascertainment – death certificates or hospital, employment in various industries, urban or rural residence).</p> | <p>For snuff dipping, OR=4.2 (95% CI 2.6 to 6.7) among white women. Risk approached 50-fold for cancers of gum and buccal mucosa, significant dose-response relationship observed (e.g. OR = 47.5, 95% CI 9.1 to 249.5) for those who had been using snuff for 50 years or more compared with (OR=13.8, 95% CI, 1.9 to 98.0) for those who had used snuff for 1-24 years. Attributable risk % estimated at 31%. Risks were slightly lower among black women, who also consumed less snuff and had used snuff for a shorter duration compared with white women.</p> | <p>Response rates were good (91% of cases, 82% of controls).</p> <p>All were interviewed at home, but a much higher proportion of interviews were carried out with 'next of kin' among cases than controls (51% versus 21%).</p> <p>No information on risk in men.</p> <p>Quality: A</p> |

| <b>ID</b> | <b>Study Type of ST</b>                                                                           | <b>Subjects, Setting and years of recruitment</b>                                                          | <b>Sample size No. of ST users</b>                                                                                | <b>Measurement of exposure, outcomes and confounders</b>                                                                                                                                                                                           | <b>Findings or Results</b>                                                                                                                                                                                | <b>Comments</b>                                                                                                                                                                                                                                                                  |
|-----------|---------------------------------------------------------------------------------------------------|------------------------------------------------------------------------------------------------------------|-------------------------------------------------------------------------------------------------------------------|----------------------------------------------------------------------------------------------------------------------------------------------------------------------------------------------------------------------------------------------------|-----------------------------------------------------------------------------------------------------------------------------------------------------------------------------------------------------------|----------------------------------------------------------------------------------------------------------------------------------------------------------------------------------------------------------------------------------------------------------------------------------|
| 14        | Williams and Horm, 1977[109]<br>Chewing tobacco and snuff (cans or plugs per week * years of use) | Third National Cancer Survey – a random 10% sample of all incident cases in survey areas in the US 1969-72 | 7518 cases (controls are inter-case comparisons)<br>Males, 132 cases, 169 controls<br>Females 5 cases 53 controls | Some information and frequency and quantity of ST used.<br><br>Sites clearly described (though not in this paper).<br><br>Basic confounders (age, sex, race and cigarette smoking) are considered, but could not control for cigar / pipe smoking. | Use of chewing tobacco or snuff was positively associated with cancer of oral cavity (OR = 3.88 for 1-50 chewing years, OR = 6.65 for >50 chewing years in males. Larynx OR = 1.75 and 2.64 respectively. | Part of large national survey – should be representative.<br>Controls are cancers from sites not thought related to tobacco or alcohol consumption in the TCNS – may dilute estimates of risk.<br>Possible non-response bias – only 67% of sample interviewed.<br><br>Quality: A |

| <b>ID</b> | <b>Study Type of ST</b>                                          | <b>Subjects, Setting and years of recruitment</b>                                                                                                                                                                                                       | <b>Sample size No. of ST users</b>                                                                                                              | <b>Measurement of exposure, outcomes and confounders</b>                                                                                                                                                                                                                                                                                                                                                                  | <b>Findings or Results</b>                                                                                         | <b>Comments</b>                                                                                                                                   |
|-----------|------------------------------------------------------------------|---------------------------------------------------------------------------------------------------------------------------------------------------------------------------------------------------------------------------------------------------------|-------------------------------------------------------------------------------------------------------------------------------------------------|---------------------------------------------------------------------------------------------------------------------------------------------------------------------------------------------------------------------------------------------------------------------------------------------------------------------------------------------------------------------------------------------------------------------------|--------------------------------------------------------------------------------------------------------------------|---------------------------------------------------------------------------------------------------------------------------------------------------|
| 15        | Wynder and Stellman, 1977[110]<br>Chewing tobacco and oral snuff | Patients with cancer of lung, larynx, oesophagus or bladder from 20 hospitals in 8 American Cities – New York, Houston, Los Angeles, Birmingham, Miami, New Orleans. Controls from same hospitals but without tobacco-related disease.<br><br>1969-1975 | 3716 cases, and 3716 controls<br><br>291 cases, 233 controls had ever used chewing tobacco,<br><br>79 cases and 69 controls had ever used snuff | No definition or description of ST use.<br><br>Sites included clearly stated (lung cancer ICD 162, oral cavity 140-149, larynx 161, oesophagus 150, bladder 188) and histologically proven.<br><br>Limited consideration of confounders (age, race and city), but states that smoking habits of users of chewing tobacco did not differ significantly from non-users of chewing tobacco in any cancer diagnosis category. | OR among snuff users ranged from 0.5 (Lung II cancer) to 1.7 (oesophagus) but none were statistically significant. | Insufficient cases to demonstrate increased risk due to chewing tobacco or snuff use alone, therefore use combined in analyses.<br><br>Quality: F |

| <b>ID</b> | <b>Study Type of ST</b>                | <b>Subjects, Setting and years of recruitment</b>                                                                                                                                                                                                                                                                                                             | <b>Sample size No. of ST users</b>                                                                                                                                    | <b>Measurement of exposure, outcomes and confounders</b>                                                                                                                                                                                                                                                                          | <b>Findings or Results</b>                                                                                                                                                                                                                                                         | <b>Comments</b>                                                                                                                                                                               |
|-----------|----------------------------------------|---------------------------------------------------------------------------------------------------------------------------------------------------------------------------------------------------------------------------------------------------------------------------------------------------------------------------------------------------------------|-----------------------------------------------------------------------------------------------------------------------------------------------------------------------|-----------------------------------------------------------------------------------------------------------------------------------------------------------------------------------------------------------------------------------------------------------------------------------------------------------------------------------|------------------------------------------------------------------------------------------------------------------------------------------------------------------------------------------------------------------------------------------------------------------------------------|-----------------------------------------------------------------------------------------------------------------------------------------------------------------------------------------------|
| 16        | Martinez, 1969[111]<br>Chewing tobacco | <p>All cases of malignancy of oesophagus, mouth and pharynx, in all hospitals and clinics in Puerto Rico in one year, 1968.</p> <p>Hospital controls (selected from same hospital or clinic, admitted immediately after patient and free from any of the carcinomas studied) and age-sex matched community controls using a pre-specified sampling frame.</p> | <p>400 cases, 179 oesophagus, 153 mouth, 68 pharynx, 1200 controls</p> <p>For those who chewed only and did not use other tobacco forms, 15 cases and 48 controls</p> | <p>No description or definition of chewing tobacco use.</p> <p>Sites included clearly stated (ICD codes 140-150) – 1955 classification. Includes only cancers histologically confirmed.</p> <p>Very limited control of confounding – by restricting analyses to those who chewed only and did not use other forms of tobacco.</p> | <p>Patients with cancer of the mouth did not often use chewing tobacco disproportionately (OR for all 3 sites was 1.53, 95% CI 0.76 to 3.05). For oesophagus, (OR= 1.94 95% CI 0.76 to 4.86), mouth (OR= 10.48 95% CI 1.63 to 84.68) pharynx (OR= 4.69, 95% CI 0.67 to 32.81).</p> | <p>Interviewers unaware of hypothesis of site of primary cancer.</p> <p>Few important confounders considered (age and sex by matching, other tobacco use by exclusion).</p> <p>Quality: A</p> |

| <b>ID</b> | <b>Study Type of ST</b>                                                                              | <b>Subjects, Setting and years of recruitment</b>                                                                                       | <b>Sample size No. of ST users</b>                                                                                                                                                                                                                                                                    | <b>Measurement of exposure, outcomes and confounders</b>                                                                                                            | <b>Findings or Results</b>                                                                                                                                                                                                                                                                                                                                                      | <b>Comments</b>                                                                                                                                                                                                                                                                                                                                |
|-----------|------------------------------------------------------------------------------------------------------|-----------------------------------------------------------------------------------------------------------------------------------------|-------------------------------------------------------------------------------------------------------------------------------------------------------------------------------------------------------------------------------------------------------------------------------------------------------|---------------------------------------------------------------------------------------------------------------------------------------------------------------------|---------------------------------------------------------------------------------------------------------------------------------------------------------------------------------------------------------------------------------------------------------------------------------------------------------------------------------------------------------------------------------|------------------------------------------------------------------------------------------------------------------------------------------------------------------------------------------------------------------------------------------------------------------------------------------------------------------------------------------------|
| 17        | Vogler et al 1962[112]<br><br>Chewing tobacco (mainly among men), snuff dipping (mainly among women) | All new adult patients and new & old mouth cancer patients attending the Robert Winship Memorial Clinic, Atlanta. Jan 1956 to July 1957 | 333 with cancers of oral cavity and pharynx (group 1), 214 with other mouth diseases (group 2), 584 with cancers of sites other than mouth (group 3), pharynx and larynx, 500 with no cancers (group 4).<br><br>Number of ST users:<br>110 in group 1, 58 in group 2, 230 in group 3, 166 in group 4. | No clear definition or descriptions of ST use.<br><br>Sites included stated clearly (cancers of mouth, pharynx, larynx).<br><br>No apparent control of confounders. | The proportion of ST users was generally higher among those in groups 1 and 2 than 3 and 4. Crude OR for women in group 1 versus groups 3 and 4 (OR= 3.69 95% CI, 2.37 to 5.75), and for males (OR= 1.45, 95% CI ,0.99 to 2.12). Dose-response relationships (chewing tobacco 7 hours or more) were generally not statistically significant, due to the small numbers involved. | Several control series were used (cancers of other sites and no cancers) and another series of patients with diseases of the mouth other than cancers (such as leukoplakia). Results were presented separately for urban and rural males and females. Number of chewers for males read off figure and therefore approximate.<br><br>Quality: F |

| ID | Study Type of ST                                   | Subjects, Setting and years of recruitment                                                                                                                                   | Sample size No. of ST users                                                                                                                                        | Measurement of exposure, outcomes and confounders                                                                                                                                                                                                          | Findings or Results                                                                                                                                                                                                                                                                                                                                                                                                                                                                                                        | Comments                                                                                                                                                                                                                                            |
|----|----------------------------------------------------|------------------------------------------------------------------------------------------------------------------------------------------------------------------------------|--------------------------------------------------------------------------------------------------------------------------------------------------------------------|------------------------------------------------------------------------------------------------------------------------------------------------------------------------------------------------------------------------------------------------------------|----------------------------------------------------------------------------------------------------------------------------------------------------------------------------------------------------------------------------------------------------------------------------------------------------------------------------------------------------------------------------------------------------------------------------------------------------------------------------------------------------------------------------|-----------------------------------------------------------------------------------------------------------------------------------------------------------------------------------------------------------------------------------------------------|
| 18 | Wynder et al 1957[113]<br><br>ST use not described | Oral cancers seen at Memorial Centre for Cancer and Allied Diseases, New York. Controls matched by age and religion from same clinic.<br><br>Years of recruitment not stated | 659 cases, 232 malignant controls, 207 benign controls. In males, 543 cases, 116 malignant controls, 91 benign controls. In females, approx. 87 cases, 16 controls | ST use not described or defined<br><br>Sites included stated (lip, floor of mouth, gum, buccal mucosa, tongue, palate, tonsil, pharynx), but selection details and response rates unclear.<br><br>No further control of confounders (apart from matching). | There was a larger proportion of tobacco chewers among cases than in the control group (crude OR= 2.29, 95% CI 1.27 to 4.18) for all sites combined. However, all but one of the chewers also smoked, and all drank alcohol. No evidence of a dose-response relationship found. Crude ORs were highest for pharynx (OR=5.09, 95% CI 1.81 to 14.19), palate (OR = 3.34, 95% CI 1.24 to 8.9), lip (OR = 3.02, 95% CI, 1.32 to 6.9), buccal mucosa (OR = 2.97, 95% CI, 1.06 to 8.16), tongue (OR = 2.20, 95% CI, 1.1 to 4.44) | Stated that in most cases interviewers were unaware of cancer diagnosis. Also states that only in cases of cancer of the gum and lip did the majority of cancers usually occur at the site at which the tobacco was usually held.<br><br>Quality: F |

## Scandinavian Studies

### Case-control studies

| ID | Study<br>Type of ST                                                                                                                                                                                      | Setting<br>Years of recruitment                                                                                                                                                                                                                                                                                            | Sample size<br>No. of ST<br>users                                     | Measurement of<br>exposure, outcomes<br>and confounders                                                                                                                                                                                                                                                             | Findings (relative risk)                                                                                                                                                                                                                                                                                                                                                                                                                                                                                                                                                                          | Comments                                                                                                                                                                                                                                                                                                             |
|----|----------------------------------------------------------------------------------------------------------------------------------------------------------------------------------------------------------|----------------------------------------------------------------------------------------------------------------------------------------------------------------------------------------------------------------------------------------------------------------------------------------------------------------------------|-----------------------------------------------------------------------|---------------------------------------------------------------------------------------------------------------------------------------------------------------------------------------------------------------------------------------------------------------------------------------------------------------------|---------------------------------------------------------------------------------------------------------------------------------------------------------------------------------------------------------------------------------------------------------------------------------------------------------------------------------------------------------------------------------------------------------------------------------------------------------------------------------------------------------------------------------------------------------------------------------------------------|----------------------------------------------------------------------------------------------------------------------------------------------------------------------------------------------------------------------------------------------------------------------------------------------------------------------|
| 19 | Lewin et al 1998[48]<br>Moist oral snuff, men who had ever regularly used 1 package (50g) per week defined as ever-users, men who used snuff 1 year prior to time of interview defined as current users. | Men living in and included in population registries of Stockholm county or southern health care region of Sweden. Cancers of oral cavity, oro- and hypo-pharynx, larynx and oesophagus. Population controls chosen from population registers every 6 months in study period, stratified by region and age<br><br>1988-1991 | 605 cases, 756 controls<br><br>91 cases, 106 controls used oral snuff | Oral snuff use clearly defined and described including trend information.<br><br>Sites included clearly defined, unclear how cases were confirmed.<br><br>Control of confounding limited to age and region (by matching), and cigarette smoking (by restricting some analyses to snuff users who had never smoked). | OR for current users compared with never tobacco users (OR= 3.3, 95% CI 0.8 to 12.0), ever-users (OR= 4.7, 95% CI 1.6 to 13.8), ex-users (OR=10.5, 95% CI, 1.4 to 117.8). With current smokers as reference category OR were not statistically significant. Age at starting, total no. of years of use, and total amount used in a lifetime had little or no impact on risk. High intensity of use (>50g/week) associated with moderately but not statistically significant higher risk for oral cavity cancer (OR = 1.7, 95% CI 0.8 to 3.9) and oesophageal cancer (OR = 1.9, 95% CI 0.8 to 3.0) | Restricted to men only. Response rates high (90% of cases, 85% of controls). Cases interviewed in hospital, controls at home. Referent category "never tobacco users" has low precision (9 cases, 10 controls) and other analyses use referent category of "current smokers", or "former smokers".<br><br>Quality: A |

| ID | Study<br>Type of ST                               | Setting<br>Years of recruitment                                                                                                                                                                                                                                                                                                                   | Sample size<br>No. of ST<br>users                                                                                                                                                       | Measurement of<br>exposure, outcomes<br>and confounders                                                                                                                                                                                                                                                                                                          | Findings (relative risk)                                                                                                                                                                                                                                                                                                                                                                                                                                                                    | Comments                                                                                                                                                                                                                                                                                                                                                                                                                    |
|----|---------------------------------------------------|---------------------------------------------------------------------------------------------------------------------------------------------------------------------------------------------------------------------------------------------------------------------------------------------------------------------------------------------------|-----------------------------------------------------------------------------------------------------------------------------------------------------------------------------------------|------------------------------------------------------------------------------------------------------------------------------------------------------------------------------------------------------------------------------------------------------------------------------------------------------------------------------------------------------------------|---------------------------------------------------------------------------------------------------------------------------------------------------------------------------------------------------------------------------------------------------------------------------------------------------------------------------------------------------------------------------------------------------------------------------------------------------------------------------------------------|-----------------------------------------------------------------------------------------------------------------------------------------------------------------------------------------------------------------------------------------------------------------------------------------------------------------------------------------------------------------------------------------------------------------------------|
| 20 | Schildt et al<br>1998[49]<br><br>Moist oral snuff | All histologically verified<br>SCC oral cancer cases<br>diagnosed and reported<br>to Cancer Registry in 4<br>most Northern counties<br>of Sweden (Norrbotten,<br>Vasterbotten, Jamtland,<br>and Vasternorrland).<br>Population-based<br>controls selected,<br>matched on age, sex,<br>county and year of<br>death for dead cases<br><br>1980-1989 | 410 cases, 410<br>controls<br>67 cases, and<br>72 controls had<br>used snuff<br>39 cases and 54<br>controls were<br>active users, 28<br>cases and 18<br>controls were<br>ex-snuff users | Use of oral snuff was<br>clearly defined and<br>some attempt made to<br>estimate lifetime<br>exposure.<br><br>Sites included clearly<br>defined (ICD-7 140,<br>141 143-5).<br><br>Reported ORs matched<br>on age, sex and<br>county of residence.<br>States that<br>multivariate analyses<br>(controlling for alcohol<br>and smoking) made<br>little difference. | OR for active snuff use was<br>0.7 (95% CI 0.4 to 1.1), for<br>ex-users (OR= 1.5 95% CI<br>0.8 to 2.9). The most<br>common tumour was lip,<br>with OR= 1.8 95% CI 0.9 to<br>3.7 for ex-snuff users but<br>close to unity for current<br>users. Higher levels of<br>consumption were not<br>significantly associated with<br>risk e.g. OR= 1.1 95% CI 0.5<br>to 2.0 for those consuming<br>an estimated lifetime >156<br>kg, and (OR= 0.8, 95% CI<br>0.4 to 1.5) for < 156kg<br>consumption. | All cases and controls sent<br>mailed questionnaire and<br>attempts made to disguise<br>primary hypotheses.<br>Response rates were high<br>(86% after refusers and<br>their counterparts<br>excluded). A large<br>proportion of cases had<br>died (235 dead cases<br>compared with 135 living<br>cases) and information<br>obtained from relatives.<br>Number of oral snuff users<br>is relatively small.<br><br>Quality: A |

| ID | Study<br>Type of ST                                                                                                     | Setting<br>Years of recruitment                                                                                                                                                                                                                  | Sample size<br>No. of ST<br>users                                                                                            | Measurement of<br>exposure, outcomes<br>and confounders                                                                                                                                                                                                                                                 | Findings (relative risk)                                                                                                                                                                                                                                                                  | Comments                                                                                                                                                                                            |
|----|-------------------------------------------------------------------------------------------------------------------------|--------------------------------------------------------------------------------------------------------------------------------------------------------------------------------------------------------------------------------------------------|------------------------------------------------------------------------------------------------------------------------------|---------------------------------------------------------------------------------------------------------------------------------------------------------------------------------------------------------------------------------------------------------------------------------------------------------|-------------------------------------------------------------------------------------------------------------------------------------------------------------------------------------------------------------------------------------------------------------------------------------------|-----------------------------------------------------------------------------------------------------------------------------------------------------------------------------------------------------|
| 21 | Bundgaard et al[114] 1994<br>Not stated                                                                                 | Oral cavity cancers,<br>Aarhus University<br>Hospital, Denmark<br>Population-based<br>controls selected<br>randomly from Danish<br>Central Population<br>Register, matched on<br>age and sex,<br>1986-1990                                       | 161 cases, 450<br>controls<br>8 cases<br>14 controls used<br>chewing<br>tobacco, no<br>snuff users                           | Types of ST used not<br>clearly described or<br>defined, some<br>information on weekly<br>consumption, years at<br>this consumption level,<br>and years since<br>quitting.<br><br>Sites included clearly<br>defined and confirmed<br>histologically.<br><br>Too few cases for<br>multivariate analysis. | Very few participants<br>reported current or previous<br>consumption of chewing<br>tobacco or snuff (crude OR =<br>1.64). A single patient had a<br>carcinoma at precisely the<br>site in the oral cavity where<br>he had habitually put his<br>chewing tobacco for the past<br>20 years. | Consecutively admitted<br>incident patients, self-<br>completed questionnaires<br>used to avoid interviewer<br>bias. Response rates high<br>(96% for cases, 84% for<br>controls).<br><br>Quality: F |
| 22 | Wynder et al<br>1957[115]<br><br>Chewing tobacco,<br>Kentucky and<br>Virginia Tobaccos,<br>little else usually<br>added | Patients with cancers of<br>upper alimentary tract<br>and respiratory tract<br>attending<br>Radiumhemmet,<br>Stockholm Sweden.<br>Controls were patients<br>with other cancers and<br>head and neck cancer<br>other than SCC<br><br>1952 to 1955 | 472 cases, 271<br>controls<br><br>Number of<br>tobacco chewers<br>not given<br>(stated that no<br>female patients<br>chewed) | Limited description of<br>ST use.<br><br>Sites included quite<br>clearly stated (though<br>no ICD codes).<br><br>Potential confounders<br>not controlled for                                                                                                                                            | Nearly half of patients with<br>cancer of gum and buccal<br>cavity had chewed for many<br>years. In most cases, cancer<br>appeared in the area in<br>which the chewed tobacco<br>was held.                                                                                                | Actual number of chewers<br>among cases and controls<br>is not given.<br><br>Quality: F                                                                                                             |

## Asian studies

### Prospective cohorts

| ID | Study<br>Type of ST                                                                                             | Setting<br>Years of<br>recruitment                                      | Sample size<br>No. of ST users                                                                      | Measurement of exposure,<br>outcomes and confounders                                                                                                                                                                                                                                                                          | Findings (relative<br>risk)                                                                                                                                                                                                                                                                                                                                                                                                                 | Comments                                                                                                                                                                                                                                                                                                              |
|----|-----------------------------------------------------------------------------------------------------------------|-------------------------------------------------------------------------|-----------------------------------------------------------------------------------------------------|-------------------------------------------------------------------------------------------------------------------------------------------------------------------------------------------------------------------------------------------------------------------------------------------------------------------------------|---------------------------------------------------------------------------------------------------------------------------------------------------------------------------------------------------------------------------------------------------------------------------------------------------------------------------------------------------------------------------------------------------------------------------------------------|-----------------------------------------------------------------------------------------------------------------------------------------------------------------------------------------------------------------------------------------------------------------------------------------------------------------------|
| 23 | Gupta et al<br>1980[57];<br>Mehta et al.<br>1981[58]<br>Tobacco<br>quid<br>chewing<br><br>No further<br>details | Districts in Kerala,<br>Gujarat, Andhra<br>Pradesh, Bihar India<br>1966 | 30,525<br>No. ST users not stated<br>23,416 person-years of<br>observation among<br>tobacco chewers | Some details of tobacco use<br>habits and changes over time.<br><br>Outcomes (changes in lesions,<br>type, locations, photographs,<br>regression and recurrence rates)<br>all clearly defined.<br><br>Unable to consider other<br>possible confounders other than<br>tobacco habits and changes in<br>these habits over time. | Oral cancer (and oral<br>precancerous lesions)<br>occurred almost solely<br>among those who<br>practiced tobacco habits<br>in some form. Oral<br>cancer was always<br>preceded by some type<br>of precancerous lesion.<br>The rate of malignant<br>transformation for those<br>with leukoplakia who<br>chewed tobacco was 9.7<br>per 1000 per year,<br>compared with zero for<br>those who smoked and<br>those who had no<br>tobacco habit. | High response rates<br>(ranged from 80% in<br>early years to just under<br>70% in later years).<br>Frequent follow-up (first<br>follow-up 1969-70 then 8<br>annual surveys in<br>Ernakulam, Gujarat and<br>Bihar), allowed<br>consideration of changes<br>in tobacco chewing and<br>smoking habits.<br><br>Quality: A |

### Case-control studies

| ID | Study<br>Type of ST                                                      | Subjects, Setting<br>and<br>years of<br>recruitment                 | Sample size<br>No. of ST users                                                                                                                                 | Measurement of<br>exposure, outcomes<br>and confounders                                                                                                                                                                                                                                                                                                                   | Findings or Results                                                                                                                                                                                                                                                                                                                                                                                                                                                                                                                                                                                                                                                                                                                                                                             | Comments                                                                                                                                                                                                                                                                                                                                                                       |
|----|--------------------------------------------------------------------------|---------------------------------------------------------------------|----------------------------------------------------------------------------------------------------------------------------------------------------------------|---------------------------------------------------------------------------------------------------------------------------------------------------------------------------------------------------------------------------------------------------------------------------------------------------------------------------------------------------------------------------|-------------------------------------------------------------------------------------------------------------------------------------------------------------------------------------------------------------------------------------------------------------------------------------------------------------------------------------------------------------------------------------------------------------------------------------------------------------------------------------------------------------------------------------------------------------------------------------------------------------------------------------------------------------------------------------------------------------------------------------------------------------------------------------------------|--------------------------------------------------------------------------------------------------------------------------------------------------------------------------------------------------------------------------------------------------------------------------------------------------------------------------------------------------------------------------------|
| 24 | Dikshit and Kanhere 2000[52]<br>Tobacco quid chewing, no further details | Bhopal Population-Based Cancer Registry, Bhopal, India<br>1986-1992 | 247 oropharyngeal cases, 148 oral cavity cases, 163 lung cases, 260 controls<br>52 among lung cases, 104 oropharynx cases, 116 oral cavity cases, 108 controls | No clear definitions of ST use, but detailed trend information reported.<br><br>Sites included clearly defined using ICD-O codes, histologically confirmed.<br><br>Controls for age, sex, education, religion and cigarette smoking (but does not specify how variables were measured or adjusted for). Stated that risk estimates could not be adjusted for alcohol use. | Tobacco chewing showed 6-fold increase (OR= 5.8, 95% CI 3.6 to 9.5), adjusted for age and smoking for oral cavity cancer - marginally increased risk for cancer of oropharynx (OR = 1.2, 95% CI 0.8 to 1.8), no increase for lung ca (OR= 0.7, 95% CI 0.4 to 1.2) compared with non-chewers. Linear dose-response relationship with amount chewed per day and duration of chewing in years for both oropharynx and oral cavity ca. For those chewing >10 pieces per day, OR 13.9, 95% CI 7.1 to 27.2), for oral cavity cancer and OR =3.6, (95% CI 1.7 to 7.4) for oropharyngeal cancer. Chewing for over 30 years associated with (OR= 23.9, 95% CI 12.0 to 47.3) for oral cavity ca. Attributable risk for those who chewed tobacco estimated at 84.4% for development of oral cavity cancer. | Information on controls collected from a separate survey of 2500 males in Bhopal – based on a random sample of voter list of Bhopal cancer registry, 1989-1992. Response rates unclear – cases for which detailed information about smoking or chewing history was unavailable or cases registered from death certificates were excluded (unclear how many).<br><br>Quality: A |

| ID | Study<br>Type of ST                        | Subjects, Setting<br>and<br>years of<br>recruitment                                                                                                                                                                                                    | Sample size<br>No. of ST users                                  | Measurement of<br>exposure, outcomes<br>and confounders                                                                                                                                                                                                                                                                                    | Findings or Results                                                                                                                                                                                                                                                                                                                                                                                                                         | Comments                                                                                                                                                                                                                                                                            |
|----|--------------------------------------------|--------------------------------------------------------------------------------------------------------------------------------------------------------------------------------------------------------------------------------------------------------|-----------------------------------------------------------------|--------------------------------------------------------------------------------------------------------------------------------------------------------------------------------------------------------------------------------------------------------------------------------------------------------------------------------------------|---------------------------------------------------------------------------------------------------------------------------------------------------------------------------------------------------------------------------------------------------------------------------------------------------------------------------------------------------------------------------------------------------------------------------------------------|-------------------------------------------------------------------------------------------------------------------------------------------------------------------------------------------------------------------------------------------------------------------------------------|
| 25 | Rao et al<br>1998[53]<br><br>Betel chewing | Male tongue cancer patients seen at Tata Memorial Hospital, Bombay, India. Controls were male patients diagnosed as free from cancer, infectious disease and benign lesion at same hospital, unclear precisely how these were chosen.<br><br>1980-1984 | 637 cases 635 controls<br><br>ST users: 229 cases, 233 controls | Some general information on composition of ST and dose-response information<br><br>Sites included clearly defined (ICD 1410 BT and ICD 141-144 AT), all cases confirmed histologically.<br><br>Many potential confounders considered (age, literacy, cigarette and bidi smoking, type of residence, alcohol consumption, vegetarian diet). | OR tobacco chewers compared with non-chewers (OR=1.81, 95% CI 1.21 to 2.73) for anterior tongue (AT), (OR=0.70, 95% CI 0.5 to 0.9) for base tongue (BT). Multivariate analysis OR = 1.74 (95% CI 1.17 to 2.57) for AT, 0.88 (95% CI 0.65 to 1.19) for BT. A statistically significant trend was found with increases in frequency and duration of tobacco use, but it is unclear whether this refers to chewing tobacco or smoking or both. | Information on dose-response collected, but not reported separately for tobacco chewers. Cases and controls were interviewed before clinical examination and investigators not aware of diagnosis. Not complete case series, unclear how many cases not included.<br><br>Quality: A |

| ID | Study<br>Type of ST                                        | Subjects, Setting<br>and<br>years of<br>recruitment                                                                                                                                                                                                            | Sample size<br>No. of ST users                                         | Measurement of<br>exposure, outcomes<br>and confounders                                                                                                                                                                                                                                                                                                                                                                                                                                                                                        | Findings or Results                                                                                                                                                                                                                                                                                                                                                                                                                                                                                                                                                                                            | Comments                                                                                                                                                                                                                                                                                                  |
|----|------------------------------------------------------------|----------------------------------------------------------------------------------------------------------------------------------------------------------------------------------------------------------------------------------------------------------------|------------------------------------------------------------------------|------------------------------------------------------------------------------------------------------------------------------------------------------------------------------------------------------------------------------------------------------------------------------------------------------------------------------------------------------------------------------------------------------------------------------------------------------------------------------------------------------------------------------------------------|----------------------------------------------------------------------------------------------------------------------------------------------------------------------------------------------------------------------------------------------------------------------------------------------------------------------------------------------------------------------------------------------------------------------------------------------------------------------------------------------------------------------------------------------------------------------------------------------------------------|-----------------------------------------------------------------------------------------------------------------------------------------------------------------------------------------------------------------------------------------------------------------------------------------------------------|
| 26 | Rao et al.<br>1994[54]<br><br>Chewing paan<br>with tobacco | Male oral cancer<br>patients attending<br>Tata Memorial<br>hospital, Bombay,<br>India. Controls<br>selected from those<br>diagnosed as free<br>from cancer,<br>infectious disease<br>and benign lesions,<br>but no other details<br>provided.<br><br>1980-1984 | 713 cases, 635<br>controls<br><br>ST users: 450 cases,<br>234 controls | Some general<br>information on<br>composition of ST and<br>dose-response<br>information<br><br>Sites included clearly<br>stated (cancers of lip,<br>anterior 2/3 of tongue,<br>upper and lower<br>alveolus, floor of mouth,<br>buccal mucosa and hard<br>palate). Cancers of base<br>of tongue (ICD 1410)<br>and soft palate (ICD<br>1453) excluded. All<br>cases histologically<br>confirmed.<br><br>Control of major<br>confounders was good<br>(age, literacy, bidi<br>smoking, alcohol<br>consumption, vegetarian<br>diet, and residence). | Tobacco chewing was more<br>frequent in cases (64.3%)<br>than in controls (39.5%),<br>adjusted OR= 2.64, (95% CI<br>2.07 to 3.38). No reduction<br>in risk was shown for 'ex-<br>chewers', even those who<br>ceased over 1 year<br>previously. Statistically<br>significant trends were found<br>with increasing daily<br>frequency of use, and<br>duration of use in years e.g.<br>crude OR= 1.28 (95% CI 0.9<br>to 1.82) for 1-10 years use,<br>OR=3.88, (95% CI 2.54 to<br>5.79) for 31+ years use. Also<br>considers interaction of<br>chewing with smoking and<br>alcohol use (RR all 3 habits =<br>8.8). | Not complete case series<br>– states that not all cases<br>were diagnosed. Both<br>cases and controls were<br>interviewed prior to<br>clinical examination. Some<br>overlap with Rao et al.<br>1998 as anterior 2/3 of<br>tongue included in both<br>studies. Limited to males<br>only.<br><br>Quality: A |

| ID | Study<br>Type of ST                                                                                      | Subjects, Setting<br>and<br>years of<br>recruitment                                                                                                                                                                                                                                                     | Sample size<br>No. of ST users                                                                                                        | Measurement of<br>exposure, outcomes<br>and confounders                                                                                                                                                                                                            | Findings or Results                                                                                                                                                                                                                                                                                                                                                                                                              | Comments                                                                                                                                                     |
|----|----------------------------------------------------------------------------------------------------------|---------------------------------------------------------------------------------------------------------------------------------------------------------------------------------------------------------------------------------------------------------------------------------------------------------|---------------------------------------------------------------------------------------------------------------------------------------|--------------------------------------------------------------------------------------------------------------------------------------------------------------------------------------------------------------------------------------------------------------------|----------------------------------------------------------------------------------------------------------------------------------------------------------------------------------------------------------------------------------------------------------------------------------------------------------------------------------------------------------------------------------------------------------------------------------|--------------------------------------------------------------------------------------------------------------------------------------------------------------|
| 27 | Nandakumar <i>et al.</i> 1990[116]<br><br>Chewing betel leaf, areca nut and lime with or without tobacco | Patients registered with oral cancers at the Kidwai Memorial Institute of Oncology, Bangalore, India, 1982-94. Controls were those attending hospital for diagnosis of other ailments than cancer of the oral cavity, but found not to have any malignancy, matched for age, sex and area of residence. | 348 cases, 348 controls<br><br>Among males, 32 cases and 11 controls chewed tobacco.<br><br>Among females, 205 cases and 59 controls. | Some information on frequency and duration of exposure to ST<br><br>States sites included (lip, tongue, alveolus and mouth, though without ICD codes).<br><br>Conditional logistic regression was carried out, but unclear which other risk factors were included. | Risk of oral cavity cancer associated with pan-tobacco chewing was significantly higher in both males (OR = 3.6, 95% CI 1.7 to 7.9) and females (OR = 25.3, 95% CI 11.2 to 57.3). Significant trends were found with increasing number of years of chewing (e.g. OR = 15.95 95% CI 8.4 to 30.2) for chewing > 25 years compared with (OR = 1.7 95% CI 0.3 to 9.3) for 1-5 years of chewing), and number of times chewed per day. | Patients obtained from cancer registry at large regional centre, estimated that over 73% of resident cancer patients attend this hospital.<br><br>Quality: F |

| ID | Study Type of ST                                                    | Subjects, Setting and years of recruitment                                                                                                                                      | Sample size No. of ST users                                                                                                  | Measurement of exposure, outcomes and confounders                                                                                                                                                                                                                                        | Findings or Results                                                                                                                                                                                                                                                                                                                                                                                                                                                                                                                                                                                                                              | Comments                                                                                                                                                                                                                                                                         |
|----|---------------------------------------------------------------------|---------------------------------------------------------------------------------------------------------------------------------------------------------------------------------|------------------------------------------------------------------------------------------------------------------------------|------------------------------------------------------------------------------------------------------------------------------------------------------------------------------------------------------------------------------------------------------------------------------------------|--------------------------------------------------------------------------------------------------------------------------------------------------------------------------------------------------------------------------------------------------------------------------------------------------------------------------------------------------------------------------------------------------------------------------------------------------------------------------------------------------------------------------------------------------------------------------------------------------------------------------------------------------|----------------------------------------------------------------------------------------------------------------------------------------------------------------------------------------------------------------------------------------------------------------------------------|
| 28 | Sankaranarayanan et al. 1990[12]<br>Chewing betel, defined in paper | Patients registered with oral cancers at the Regional Cancer Centre Trivandrum, Kerala, India. For selection of controls see Sankaranarayanan et al. 1989[11].<br><br>1983-1984 | 414 cases, 895 controls<br><br>203 cases, 181 controls, chewed betel quid.<br><br>6 cases and 7 controls inhaled nasal snuff | ST use defined in paper, and trend information available.<br><br>Sites included clearly stated – buccal mucosa (ICD-O 145.0,145.1,145.6) and labial mucosa (ICD-O 140.3 & 140.4).<br><br>Control of confounding good (adjusted for age, religion, bidi duration, alcohol and snuff use). | Strong, significant associations and dose-response relationships seen with frequency of chewing per day, and years of chewing in males and females (e.g. males chewing 10 or fewer times per day) OR = 6.9, 95% CI 2.83 to 16.81), chewing >45 times per day (OR = 37.75, 95% CI 19.49 to 73.12), adjusted for age and religion. Chewing for 40 years or more (OR = 29.02, 95% CI 14.2 to 59.28) compared with (OR=7.12, 95% CI 2.77 to 18.24) for 10 years or less after adjusting Risk for snuff use (OR = 2.28, 95% CI 0.74 to 7.03). Interactions were observed between pan-tobacco and bidi smoking when habits dichotomised as ever/never. | Also estimates risk associated with lifetime exposure (frequency * duration) for pan-tobacco and snuff use and risk associated with adoption after age 21. Very high risks associated with small number of occasional users, later excluded from all analyses.<br><br>Quality: A |

| ID | Study Type of ST                                                    | Subjects, Setting and years of recruitment                                                                                                                                                                            | Sample size No. of ST users                                                                                                | Measurement of exposure, outcomes and confounders                                                                                                                                                                                                                                        | Findings or Results                                                                                                                                                                                                                                                                                                                                                                                                                                                                                                                                                                                                                                                                                                                                                                                                                                                               | Comments                                                                                                                                                                                                                                                                                                                                                                                                                                                  |
|----|---------------------------------------------------------------------|-----------------------------------------------------------------------------------------------------------------------------------------------------------------------------------------------------------------------|----------------------------------------------------------------------------------------------------------------------------|------------------------------------------------------------------------------------------------------------------------------------------------------------------------------------------------------------------------------------------------------------------------------------------|-----------------------------------------------------------------------------------------------------------------------------------------------------------------------------------------------------------------------------------------------------------------------------------------------------------------------------------------------------------------------------------------------------------------------------------------------------------------------------------------------------------------------------------------------------------------------------------------------------------------------------------------------------------------------------------------------------------------------------------------------------------------------------------------------------------------------------------------------------------------------------------|-----------------------------------------------------------------------------------------------------------------------------------------------------------------------------------------------------------------------------------------------------------------------------------------------------------------------------------------------------------------------------------------------------------------------------------------------------------|
| 29 | Sankaranarayanan et al. 1989[55]<br>Chewing betel, defined in paper | Patients with carcinoma of gingiva at the Regional Cancer Centre and teaching hospitals of Medical College, Trivandrum, Kerala, India. For selection of controls see Sankaranarayanan et al. 1989[11].<br><br>1983-84 | 187 cases, 895 controls<br>156 cases, 428 controls chewed pan-tobacco, 5 cases, 7 controls inhaled nasal snuff (all males) | Some description of types of ST use and dose-response relationships including an index of 'lifetime exposure'.<br><br>Sites included clearly defined (ICD 143.0 and 143.1),<br><br>Control of confounding was good (alcohol consumption, bidi smoking and duration in years, snuff use). | Pan-tobacco chewing is a major risk factor for gingival cancer, and daily frequency of chewing is a major predictor of risk (adjusted OR for chewing < 5 pieces / day (OR = 4.71, 95% CI 2.2 to 10.08) and OR > 10 pieces per day (OR= 13.25, 95% CI 6.28 to 27.88). Dose-response relationships also found for duration of chewing in years (e.g in males less than 10 years OR = 5.82, 95% CI 1.64 to 20.66), >41 years = (OR=32.06 95% CI 13.93 to 73.78). Risk was higher in occasional users than regular users for both males and females, though numbers were small. Attributable risk in male chewers for gingival cancer estimated at 54%. Risk associated with bidi smoking and tobacco chewing was only slightly higher than pan-tobacco alone. Adjusted OR snuff use = 3.9, (95% CI 1.19 to 12.7). Interaction observed between bidi smoking and pan-tobacco chewing. | Controls selected from patients who initially came to hospital to exclude malignancy in sites other than head and neck and from among those attending out-patients division of medical colleges with respiratory, intestinal and GU infections during 1983-84. Hospital records of cancer registry used, taken before diagnosis made. Occasional users excluded from main analyses, as daily frequency, age at starting habit, unknown.<br><br>Quality: A |

| ID | Study Type of ST                                                         | Subjects, Setting and years of recruitment                                                                                                                                                                                                                                                                                                                                                          | Sample size No. of ST users                                                                                                                                           | Measurement of exposure, outcomes and confounders                                                                                                                                                                                                                                                                                                                                | Findings or Results                                                                                                                                                                                                                                                                                                                                                                                                                                                                                                                                                                                                                                   | Comments                                                                                                 |
|----|--------------------------------------------------------------------------|-----------------------------------------------------------------------------------------------------------------------------------------------------------------------------------------------------------------------------------------------------------------------------------------------------------------------------------------------------------------------------------------------------|-----------------------------------------------------------------------------------------------------------------------------------------------------------------------|----------------------------------------------------------------------------------------------------------------------------------------------------------------------------------------------------------------------------------------------------------------------------------------------------------------------------------------------------------------------------------|-------------------------------------------------------------------------------------------------------------------------------------------------------------------------------------------------------------------------------------------------------------------------------------------------------------------------------------------------------------------------------------------------------------------------------------------------------------------------------------------------------------------------------------------------------------------------------------------------------------------------------------------------------|----------------------------------------------------------------------------------------------------------|
| 30 | Sankaranarayanan et al. 1989[11].<br><br>Chewing betel, defined in paper | Patients with biopsy-proven SCC carcinoma of tongue and floor of mouth at the Regional Cancer Centre, Trivandrum, Kerala, India. Two controls for each case selected from 895 patients contemporaneously attending same hospital with non-malignant conditions at sites other than head and neck, with respiratory, intestinal and GU infections, matched for age, sex and religion.<br><br>1983-84 | 288 cases (188 tongue, 40 floor of mouth, 453 controls).<br><br>145 cases and 148 controls used pan-tobacco<br>8 cases and 6 controls (all males) inhaled nasal snuff | Some description of types of ST use and dose-response relationships including an index of 'lifetime exposure'.<br><br>Sites included clearly stated (ICD-O 141.1, 141.2, 141.3, 141.4, for tongue), 144 floor of mouth, all confirmed by biopsy.<br><br>Control of confounding good (age, sex, religion, cigarette and bidi smoking, alcohol consumption, and snuff inhalation). | Strong, significant associations and dose-response relationships seen with frequency of chewing per day, and years of chewing in males and females (e.g. males chewing < 5 times per day, OR = 4.0 (95% CI 2.15 to 7.46), 10+ per day, OR = 5.52 (95% CI 2.85 to 10.67), 10 years or less of chewing, OR = 3.87 (95% CI 1.16 to 12.79), 41 years or more OR = 5.59 (95% CI 2.25 to 13.82). Also significant associations with 'lifetime exposure' e.g. for females with 70+ 'chewing years' (OR = 7.88, 95% CI 3.39 to 18.28), <70 chewing years (OR= 5.17, 95% CI 1.74 to 15.32). Interaction observed between bidi smoking and pan-tobacco chewing. | Unclear how controls were chosen. Information on dose-response relationships provided.<br><br>Quality: A |

| ID | Study<br>Type of ST                                                                                 | Subjects, Setting<br>and<br>years of<br>recruitment   | Sample size<br>No. of ST users                                                                                                                                  | Measurement of<br>exposure, outcomes<br>and confounders                                                                                                                                                                                                                                 | Findings or Results                                                                                                                                                       | Comments                                                                                                                                                                                                                                                                                   |
|----|-----------------------------------------------------------------------------------------------------|-------------------------------------------------------|-----------------------------------------------------------------------------------------------------------------------------------------------------------------|-----------------------------------------------------------------------------------------------------------------------------------------------------------------------------------------------------------------------------------------------------------------------------------------|---------------------------------------------------------------------------------------------------------------------------------------------------------------------------|--------------------------------------------------------------------------------------------------------------------------------------------------------------------------------------------------------------------------------------------------------------------------------------------|
| 31 | Chattopadhyay<br>1989[117]<br><br>Leaf of betel<br>vine, lime,<br>catechu, betel<br>nut and tobacco | College and Hospital,<br>Calcutta, India<br>1967-1987 | 732 cases, 1000<br>controls<br><br>558 cases and 146<br>controls chewed<br>tobacco or dipped<br>snuff<br>14 controls used<br>chewing tobacco, no<br>snuff users | Some description of<br>types of ST used, no<br>information on possible<br>dose-response<br>relationships.<br><br>Sites included clearly<br>stated and confirmed by<br>biopsy.<br><br>No further control of<br>confounding, and many<br>participants also smoked<br>bidis or cigarettes. | Crude OR (not reported in<br>paper) 18.8, (95% CI 14.6 to<br>24.1)<br><br>Most cases involved lower<br>jaw where contact of tobacco<br>/ paan quid would be<br>maximised. | Study mostly<br>retrospective (from 1967-<br>85 and prospective only<br>from 1986-87), some<br>hospital records<br>incomplete. Selection of<br>controls unclear – those<br>“not suffering from oral<br>cancer or any<br>precancerous lesion”,<br>matched on age and sex.<br><br>Quality: F |

| ID | Study Type of ST                                | Subjects, Setting and years of recruitment                                                                                                                                                                                                                                                                                           | Sample size No. of ST users                                                                                            | Measurement of exposure, outcomes and confounders                                                                                                                                                                    | Findings or Results                                                                                                                                                                                                                                | Comments                                                                                                                                                                                                                                                                                                 |
|----|-------------------------------------------------|--------------------------------------------------------------------------------------------------------------------------------------------------------------------------------------------------------------------------------------------------------------------------------------------------------------------------------------|------------------------------------------------------------------------------------------------------------------------|----------------------------------------------------------------------------------------------------------------------------------------------------------------------------------------------------------------------|----------------------------------------------------------------------------------------------------------------------------------------------------------------------------------------------------------------------------------------------------|----------------------------------------------------------------------------------------------------------------------------------------------------------------------------------------------------------------------------------------------------------------------------------------------------------|
| 32 | Notani and Jayant, 1987[118]<br>Chewing tobacco | Patients attending Tata Memorial Hospital with cancer of oral cavity, pharynx, oesophagus, larynx, Two control groups – hospital based (attended same hospital same time period, not diagnosed with cancer) & population controls, from electoral roles - comparable socio-economic group (OR based on hospital controls). 1976-1984 | 819 cases, (278 oral cavity; 225 pharynx, 236 oesophagus, 161 pharynx) 1211 controls<br><br>No. of ST users not stated | No definition of ST use or information on possible dose-response relationships.<br><br>Sites included clearly stated (ICD 141-145; 146, 148, 150 and 161).<br><br>Control of confounding poor (age stratified only). | Age stratified relative OR for chewers versus non-chewers were:<br>(OR=3.9, 95% CI 2.1 to 7.1) for oral cavity cancer, OR=2.3, 95% CI 1.2 to 4.4) for pharynx, (OR=1.5, 95% CI 0.8 to 2.8) for oesophagus, (OR=1.6, 95% CI 0.6 to 5.1) for larynx. | Response rates are not mentioned, main focus of paper is diet and cancer - May underestimate risk as those who chewed or smoked less than twice a day were considered in the "no habit" group.<br><br>Controls – all male members of one community (Hindus from state of Maharashtra).<br><br>Quality: F |

| ID | Study<br>Type of ST                                                              | Subjects, Setting<br>and<br>years of<br>recruitment                                                                        | Sample size<br>No. of ST users                                 | Measurement of<br>exposure, outcomes<br>and confounders                                                                                                                                                                                                                                                       | Findings or Results                                                                                                                                                                                                      | Comments                                                                                                                                                                                                                                                                                                                           |
|----|----------------------------------------------------------------------------------|----------------------------------------------------------------------------------------------------------------------------|----------------------------------------------------------------|---------------------------------------------------------------------------------------------------------------------------------------------------------------------------------------------------------------------------------------------------------------------------------------------------------------|--------------------------------------------------------------------------------------------------------------------------------------------------------------------------------------------------------------------------|------------------------------------------------------------------------------------------------------------------------------------------------------------------------------------------------------------------------------------------------------------------------------------------------------------------------------------|
| 33 | Jussawalla,<br>1981[119]<br><br>Chewing betel<br>quid with or<br>without tobacco | Patients attending<br>Tata Memorial<br>Hospital in Bombay<br>with oesophageal<br>cancers.<br><br>Time period not<br>stated | 649 cases, 649<br>controls<br><br>No of ST users not<br>stated | Some description of ST<br>used.<br><br>Limited information<br>about sites included<br><br>Some limited control of<br>confounders (age, sex,<br>location) may have been<br>achieved by matching,<br>but this is not very<br>clear, and results are<br>presented separately for<br>chewers who do not<br>smoke. | OR for pan chewing with<br>tobacco among non-smokers<br>was 2.8 for men ( $p<0.001$ )<br>and 2.0 for women (NS).<br><br>ORs for pan chewing without<br>tobacco were much higher at<br>12.1 for men, and 7.0 for<br>women | Limited information<br>concerning selection of<br>controls. The higher risk<br>of pan chewing without<br>tobacco may be explained<br>by the habit of swallowing<br>the liquid extract among<br>these chewers, whilst<br>those chewing with<br>tobacco spit out the liquid<br>as it is too pungent to<br>swallow.<br><br>Quality: F |

| ID | Study Type of ST                                                                         | Subjects, Setting and years of recruitment                                                                                                                                                                                                | Sample size No. of ST users                                                   | Measurement of exposure, outcomes and confounders                                                                                                                                                                                                                                                                                   | Findings or Results                                                                                                                                                                                                                                                                                                                                                                                                                                                                                                                    | Comments                                                                                                                                                                                                                                                                                                                                                                     |
|----|------------------------------------------------------------------------------------------|-------------------------------------------------------------------------------------------------------------------------------------------------------------------------------------------------------------------------------------------|-------------------------------------------------------------------------------|-------------------------------------------------------------------------------------------------------------------------------------------------------------------------------------------------------------------------------------------------------------------------------------------------------------------------------------|----------------------------------------------------------------------------------------------------------------------------------------------------------------------------------------------------------------------------------------------------------------------------------------------------------------------------------------------------------------------------------------------------------------------------------------------------------------------------------------------------------------------------------------|------------------------------------------------------------------------------------------------------------------------------------------------------------------------------------------------------------------------------------------------------------------------------------------------------------------------------------------------------------------------------|
| 34 | Simarak et al, 1977[68]<br><br>Betel chewing, frequently including air-sun dried tobacco | Patients attending University hospital, Chiang Mai, Thailand, with cancer of the oral cavity, oropharynx, hypopharynx, larynx and lung (patients attending radiological department of University Hospital).<br><br>Jan 1971 to April 1972 | 299 cases, 1113 controls<br><br>Betel chewers:<br><br>169 cases, 516 controls | Some description of types of ST used.<br><br>Sites included were adequately described (though without ICD codes)<br><br>Confounders controlled for included age, and province of residence by M-H (Mantel-Haenszel stratification), education, types of smoking, agricultural employment and rural residence by logistic regression | On multivariate analysis, the OR associated with oral and oropharyngeal cancers was 2.27 for men and 3.16 for women ( $p < 0.05$ in both cases). Positive associations also found with larynx and hypopharynx cancers in men (OR = 2.36, $p < 0.01$ ), but too few cases in women. There was no correspondence between the site where the quid was usually kept and site of the cancer, but numbers were small and often difficult to determine exactly place of origin of tumours within oral cavity due to advanced stage of disease | Selection of controls is well described. Unclear what proportion of betel chewers added tobacco to betel: states that 25 of 26 betel chewing cancer patients with oral and oropharyngeal cancers added tobacco to betel compared with less than 2/3 of controls – however these figures do not correspond with the proportion of betel chewers in Table 1.<br><br>Quality: A |

| <b>ID</b> | <b>Study Type of ST</b>             | <b>Subjects, Setting and years of recruitment</b>                                                          | <b>Sample size No. of ST users</b>                          | <b>Measurement of exposure, outcomes and confounders</b>                                                                                                                       | <b>Findings or Results</b>                                                                                                                                                                                                                                       | <b>Comments</b>                                                                                                                                                                                                                                                                               |
|-----------|-------------------------------------|------------------------------------------------------------------------------------------------------------|-------------------------------------------------------------|--------------------------------------------------------------------------------------------------------------------------------------------------------------------------------|------------------------------------------------------------------------------------------------------------------------------------------------------------------------------------------------------------------------------------------------------------------|-----------------------------------------------------------------------------------------------------------------------------------------------------------------------------------------------------------------------------------------------------------------------------------------------|
| 35        | Krishnamurthy and Shanta, 1976[120] | India - unclear how controls were selected, or criteria on which they were matched, response rates unclear | 1243 cases, 5824 controls<br><br>No. of ST users not stated | Type of ST use not clear, limited information on possible dose-response relationships.<br><br>Outcomes not clearly described.<br><br>Potential confounders not controlled for. | Among cases with cancers of buccal mucosa, anterior tongue, posterior tongue, pharynx, 87.9%, 67.9%, 55.1% and 33.6% chewed betel nut and tobacco, compared with 11.2% of controls: (OR= 0.79, 95% CI 0.57 to 1.11) comparing heavy or chain with light smokers. | Conference abstract – Impossible to calculate OR for most outcomes as raw numbers of neoplasms at each location not stated. Calculation of OR for heavy versus light smokers does not support authors statement that intensity of the chewing habit also seems significant.<br><br>Quality: F |

| ID | Study Type of ST                                         | Subjects, Setting and years of recruitment                                                                                | Sample size No. of ST users                                          | Measurement of exposure, outcomes and confounders                                                                                                                                                                                                                                                                                                                           | Findings or Results                                                                                                                                                                                                                                                                                                                                                                                                                                                             | Comments                                                                          |
|----|----------------------------------------------------------|---------------------------------------------------------------------------------------------------------------------------|----------------------------------------------------------------------|-----------------------------------------------------------------------------------------------------------------------------------------------------------------------------------------------------------------------------------------------------------------------------------------------------------------------------------------------------------------------------|---------------------------------------------------------------------------------------------------------------------------------------------------------------------------------------------------------------------------------------------------------------------------------------------------------------------------------------------------------------------------------------------------------------------------------------------------------------------------------|-----------------------------------------------------------------------------------|
| 36 | Jussawalla et al. 1971[121]<br><br>Betel nut and tobacco | Greater Bombay. Population controls (matched by age, sex and religion) obtained from registered voters lists.<br><br>1968 | 2005 cases, 2005 controls<br>1152 cases, 665 controls chewed tobacco | No clear definition of ST but some description of types of ST provided.<br><br>Outcomes clearly defined (ICD codes 140-148, 150, 161), and all cases confirmed histologically<br><br>Very limited control of confounding - analyses of those who chewed only compared with non-tobacco uses tended to find higher risks than analyses of chewers compared with non-chewers. | Risk of developing cancer in buccal mucosa is 7.7 times higher in chewers than non-chewers (95% CI 5.3 to 11.1). Also calculated for cancers of anterior 2/3 of mouth, alveolus, hard palate, oral cavity, base tongue, tonsils, oropharynx, nasopharynx, hypopharynx, larynx, and oesophagus. Odds ratios tend to be higher when smokers are excluded. Risks associated with both smoking and chewing are greater than additive compared with smoking alone and chewing alone. | Cancers of salivary glands and unspecified areas were excluded.<br><br>Quality: A |

| ID | Study Type of ST                               | Subjects, Setting and years of recruitment                                                                                                                                         | Sample size No. of ST users                                                                                                                                                                                                                                                                                                                                                                        | Measurement of exposure, outcomes and confounders                                                                                                                                                           | Findings or Results                                                                                                                                                                                                                                                                                                                                                                                                                                                                                                                                                                                                                                                         | Comments                                                                                                                          |
|----|------------------------------------------------|------------------------------------------------------------------------------------------------------------------------------------------------------------------------------------|----------------------------------------------------------------------------------------------------------------------------------------------------------------------------------------------------------------------------------------------------------------------------------------------------------------------------------------------------------------------------------------------------|-------------------------------------------------------------------------------------------------------------------------------------------------------------------------------------------------------------|-----------------------------------------------------------------------------------------------------------------------------------------------------------------------------------------------------------------------------------------------------------------------------------------------------------------------------------------------------------------------------------------------------------------------------------------------------------------------------------------------------------------------------------------------------------------------------------------------------------------------------------------------------------------------------|-----------------------------------------------------------------------------------------------------------------------------------|
| 37 | Hirayama, 1966[10]<br>Tobacco and lime chewing | Ceylon and India (Vellore, Bombay, Bihar). Selection of controls was not clear – patients with diseases other than cancer from Government General Hospitals in Ceylon.<br><br>1964 | India and Ceylon, 545 cases, (369 males, 163 females) 440 controls (277 males, 163 females)<br><br>In India and Ceylon, approx. 152 female cases and 122 male cases, 64 male controls and 69 female controls chewed betel quid with tobacco. A further 10 female cases and 1 control chewed betel quid with tobacco and smoked, compared with 191 cases and 69 controls (figures read off a graph) | Definitions of ST not provided.<br><br>Outcome not clearly defined.<br><br>Possible confounders were not considered (though it is stated that there were no differences in smoking between the two groups). | RR of developing oral or pharyngeal cancer at particular sites – lip RR = 5, cheek RR = 7, gingiva RR = 2.8, anterior tongue RR = 3.6 (all the above statistically significant with $p < 0.01$ ). Other sites palate RR = 1.4, posterior tongue RR = 0.8, rest of oropharynx RR = 0.4. Strong dose response relationships with frequency of chewing per day, duration of chewing each quid in minutes, and age at which chewing habit started (e.g. chewing 6 or more quids per day RR = 81.1 compared with 8.5 for <3 quids per day. Retaining quid in sleep associated with RR of 63.7. The side affected almost always corresponded to the side where the quid was kept. | Separate analyses have been performed on sub-groups and the exact numbers in each analysis is not always clear.<br><br>Quality: F |

| ID | Study Type of ST                                                                             | Subjects, Setting and years of recruitment                                             | Sample size No. of ST users                                                                                                                                                    | Measurement of exposure, outcomes and confounders                                                                                                                                                                  | Findings or Results                                                                                                                                                                                                                                                                                                                  | Comments                                                                                                                                                                                                                        |
|----|----------------------------------------------------------------------------------------------|----------------------------------------------------------------------------------------|--------------------------------------------------------------------------------------------------------------------------------------------------------------------------------|--------------------------------------------------------------------------------------------------------------------------------------------------------------------------------------------------------------------|--------------------------------------------------------------------------------------------------------------------------------------------------------------------------------------------------------------------------------------------------------------------------------------------------------------------------------------|---------------------------------------------------------------------------------------------------------------------------------------------------------------------------------------------------------------------------------|
| 38 | Shanta and Krishnamurthi, 1963[122]<br><br>Betel nut and tobacco chewing, described in paper | Patients with cancers of upper alimentary tract<br><br>Years of recruitment not stated | 882 cases, 400 controls (males 628 cases, 300 controls; females 300 cases, 100 controls)<br><br>Tobacco chewers: Males 395 cases, 28 controls; Females 174 cases, 11 controls. | Some description of types of ST used.<br><br>Sites included are clearly stated, All cancers are SCC and histologically confirmed.<br><br>No control of confounding, though cigarette smoking was rare among women. | Very strong associations with cancers of lip and buccal cavity (OR= 47.26, 95% CI 28.2 to 79.74) in males, (OR=45.51, 95% CI 20.08 to 105.72) in females. Also high OR for cancers of anterior and posterior tongue and pharynx. OR for cancers of hypopharynx and oesophagus were statistically significantly raised only in males. | Large sample size, but the methods of selection of cases and controls is unclear. Dose-response relationships not calculated but stated that all chewers had been heavy chewers over a period of 20-40 years.<br><br>Quality: F |
| 39 | Sarma, 1958[123]<br>Betel chewing, sometimes tobacco and lime added                          | Unselected patients >20 years attending Assam Medical College, India 1954-1955         | 238 oral cancer cases, 84 other cancers, 3678 non-tumour controls<br><br>No. of ST users not stated                                                                            | Some description of types of ST used.<br><br>Cancer sites included clearly stated (larynx, oesophagus, tonsil, pharynx, tongue, palate, lip, cheek, gum).<br><br>No control of confounding.                        | Out of 238 upper alimentary tract cancers, 230 addicted to betel nut chewing, of 84 tumours at other sites, 47 addicts.<br>Crude OR = 7.02, 95% CI 3.35 to 15.38) for oral cancers compared with non-tumours                                                                                                                         | Not clear how many betel nut chewers added tobacco.<br><br>Quality: F                                                                                                                                                           |

### Cross-sectional study

| ID | Study<br>Type of ST                                                               | Setting<br>Years of<br>recruitment                                                                                         | Sample size<br>No. of ST users                                   | Measurement of<br>exposure, outcomes and<br>confounders                                                                                                                                          | Findings or Results                                                                                                                                   | Comments                                |
|----|-----------------------------------------------------------------------------------|----------------------------------------------------------------------------------------------------------------------------|------------------------------------------------------------------|--------------------------------------------------------------------------------------------------------------------------------------------------------------------------------------------------|-------------------------------------------------------------------------------------------------------------------------------------------------------|-----------------------------------------|
| 40 | Chakrabarti et al. 1991[124]<br><br>Chewing betel and tobacco, no further details | Patients attending cancer detection centre of the National Cancer Institute, Calcutta, India<br><br>Time period not stated | 3205<br><br>1523 chewed betel nut with tobacco, 1677 non-chewers | ST use not clearly described, and no attempt to measure dose-response relationships.<br><br>Outcomes clearly defined and oral malignancies confirmed by biopsy.<br><br>No control of confounding | The crude OR for malignancies was 5.58, 95% CI 2.21 to 14.95, and for oral dysplasia 2.28, 95% CI 1.79 to 2.92) for ST users compared with non-users. | Cross-sectional study<br><br>Quality: F |

## Other Regions

### Case-control studies

| ID | Study<br>Type of ST                                                                                                                                                                                                           | Subjects, setting<br>and<br>years of<br>recruitment                                                                                                                                                                                                                                                                                                                      | Sample size<br>No. of ST users                                                                                                                                                   | Measurement of<br>exposure,<br>outcomes and<br>confounders                                                                                                                                                                        | Findings or Results                                                                                                                                                                                                                                                                                                                                                                                                                                                                                                                                                                                                                                                                            | Comments                            |
|----|-------------------------------------------------------------------------------------------------------------------------------------------------------------------------------------------------------------------------------|--------------------------------------------------------------------------------------------------------------------------------------------------------------------------------------------------------------------------------------------------------------------------------------------------------------------------------------------------------------------------|----------------------------------------------------------------------------------------------------------------------------------------------------------------------------------|-----------------------------------------------------------------------------------------------------------------------------------------------------------------------------------------------------------------------------------|------------------------------------------------------------------------------------------------------------------------------------------------------------------------------------------------------------------------------------------------------------------------------------------------------------------------------------------------------------------------------------------------------------------------------------------------------------------------------------------------------------------------------------------------------------------------------------------------------------------------------------------------------------------------------------------------|-------------------------------------|
| 41 | Idris et al.<br>1995[59]<br>Toombak<br>Tobacco sp. <i>N. rustica</i> – coarse powder of dried toombak leaves mixed with concentrated solution of natron (sodium bicarbonate) in water until the product is moist and hardened | <p>Patients attending radiation and isotope Centre, Khartoum, only hospital in Sudan for treatment of patients with malignant neoplasms.</p> <p>Used two control series, hospital controls with non-SCC oral neoplasms and neoplasms of non-oral sites unrelated to tobacco use; and volunteers attending oral health education programmes in Sudan</p> <p>1970-1985</p> | 646 cases (375 group 1, 271 group 2), 3024 controls (204 hospital and 2820 population) 157 cases in group 1, 52 cases in group 2, 23 hospital controls, 597 population controls) | <p>Types of ST used clearly described.</p> <p>Sites included clearly stated ICD-O codes 141.5, 143.8, 144.9, 145.0) for group 1, 141.9 and 145.5 for group 2.</p> <p>ORs adjusted for age, sex, ethnicity, and cigarette use.</p> | <p>Group 1 SCC of lip, buccal cavity, floor of mouth (OR= 7.3, 95% CI 4.3 to 12.4) with hospital controls, (OR= 3.9, 95% CI 2.9 to 5.3) with population controls. All neoplasms at sites of preference for placement of quid.</p> <p>Group 2 SCC of tongue, palate and maxillary sinus (OR= 1.4, 95% CI 0.8 to 2.5) compared with hospital controls; (OR= 0.7, 95% CI 0.5 to 1.0) compared with population controls. All neoplasms located at oral sites having little or no direct contact with quid.</p> <p>Some dose-response relationship for first group with both control groups e.g. &lt;10 years of use, (OR= 0.7, 95% CI 0.3 to 1.8) &gt;11 years (OR= 11.0, 95% CI 4.8 to 25.1).</p> | <p>Good study</p> <p>Quality: A</p> |

| ID | Study<br>Type of ST                                              | Subjects, setting<br>and<br>years of<br>recruitment                                                                                                                                                | Sample size<br>No. of ST users                                                                                                                 | Measurement of<br>exposure,<br>outcomes and<br>confounders                                                                                                                                                                                                                                                                                                                         | Findings or Results                                                                                                                                                                                                                                                                                                                                                                                                                           | Comments                                                                                                                                                                                                                             |
|----|------------------------------------------------------------------|----------------------------------------------------------------------------------------------------------------------------------------------------------------------------------------------------|------------------------------------------------------------------------------------------------------------------------------------------------|------------------------------------------------------------------------------------------------------------------------------------------------------------------------------------------------------------------------------------------------------------------------------------------------------------------------------------------------------------------------------------|-----------------------------------------------------------------------------------------------------------------------------------------------------------------------------------------------------------------------------------------------------------------------------------------------------------------------------------------------------------------------------------------------------------------------------------------------|--------------------------------------------------------------------------------------------------------------------------------------------------------------------------------------------------------------------------------------|
| 42 | Van Wyk et al<br>1993[125]<br><br>Betel chewing<br>and snuff use | Indian patients with<br>oral SCC, Natal,<br>South Africa.<br>Controls from same<br>ethnic group were<br>recruited in a<br>separate house-to-<br>house survey in 1983<br>in Natal.<br><br>1983-1989 | 150 cases,<br>1029 controls<br>32 female cases and<br>21 controls chewed<br>betel with tobacco, 18<br>female cases, 5 male<br>cases used snuff | Some description of<br>types of ST used.<br><br>Sites included clearly<br>stated – tongue ICD<br>141, cheek incl.<br>cuccal mucosa (ICD<br>143, 145.0), floor of<br>mouth, palate and<br>oropharynx (ICD<br>144, 145.1, 145.8,<br>146.0), all<br>histologically<br>confirmed.<br><br>Poor control of<br>confounding, though<br>smoking was rare in<br>women (only 7% of<br>cases). | OR for areca nut chewing with<br>tobacco in women was 47.42<br>(95% CI 20.34 to 110.54) and<br>the attributable risk for oral<br>cancer was 91%. OR for areca<br>nut chewing without tobacco<br>was 43.9 (95% CI 18.6 to<br>103.57). Controls matched on<br>age. Unable to show a<br>relationship with snuff use as<br>87% of the snuff dippers have<br>additional habits, and no<br>relationship found with duration<br>of chewing in years. | Could not calculate OR for<br>men as areca nut chewing<br>was rare. Not stated how<br>many controls used snuff.<br>All patients suffered from<br>submucous fibrosis,<br>regarded as a pre-<br>malignant condition.<br><br>Quality: F |

| ID | Study<br>Type of ST                                      | Subjects, setting<br>and<br>years of<br>recruitment                                                                                                                                                                                                                                                                                                                 | Sample size<br>No. of ST users                                         | Measurement of<br>exposure,<br>outcomes and<br>confounders                                                                                                                                                                                    | Findings or Results                                                                   | Comments                                                                                                                               |
|----|----------------------------------------------------------|---------------------------------------------------------------------------------------------------------------------------------------------------------------------------------------------------------------------------------------------------------------------------------------------------------------------------------------------------------------------|------------------------------------------------------------------------|-----------------------------------------------------------------------------------------------------------------------------------------------------------------------------------------------------------------------------------------------|---------------------------------------------------------------------------------------|----------------------------------------------------------------------------------------------------------------------------------------|
| 43 | Franco et al<br>1989[126]<br><br>ST use not<br>described | Patients with newly<br>diagnosed cancers of<br>tongue, gum, floor of<br>mouth and other<br>parts of oral cavity in<br>three areas of Brazil.<br>Controls were<br>patients from same<br>hospital to which<br>cases had been<br>admitted, or<br>neighbouring general<br>hospitals, matched<br>on sex, age and<br>trimester of hospital<br>admission.<br><br>1986-1988 | 232 cases, 464<br>controls<br><br>ST users: 9 cases and<br>13 controls | No description of ST<br>use.<br><br>Sites included clearly<br>stated (ICD 9 141<br>and 143-145, cases<br>confirmed<br>histopathologically.<br><br>Adjusted by<br>matching for<br>smoking and drinking<br>status, sex, and<br>anatomical site. | Use of ST, either as snuff or<br>chew, was not associated with<br>risk of oral cancer | Cases and controls were<br>interviewed blind to the<br>hypothesis under<br>investigation, and small<br>numbers only.<br><br>Quality: F |

| ID | Study<br>Type of ST                                                                                    | Subjects, setting<br>and<br>years of<br>recruitment                                                                              | Sample size<br>No. of ST users                                                                                           | Measurement of<br>exposure,<br>outcomes and<br>confounders                                                                                                                                                                                                                                                          | Findings or Results                                                                                        | Comments                                                                                                                                                                                                                                                                                                                                                                                                                                                                 |
|----|--------------------------------------------------------------------------------------------------------|----------------------------------------------------------------------------------------------------------------------------------|--------------------------------------------------------------------------------------------------------------------------|---------------------------------------------------------------------------------------------------------------------------------------------------------------------------------------------------------------------------------------------------------------------------------------------------------------------|------------------------------------------------------------------------------------------------------------|--------------------------------------------------------------------------------------------------------------------------------------------------------------------------------------------------------------------------------------------------------------------------------------------------------------------------------------------------------------------------------------------------------------------------------------------------------------------------|
| 44 | Cook-Mozaffari<br>et al 1979[127]<br><br>Nass – chewing<br>tobacco and<br>lime – no further<br>details | Cases registered at<br>Caspian Cancer<br>Registry, Province of<br>Mazandaran and<br>Gilan along the<br>Caspian Sea.<br>1974-1976 | 344 cases oesophageal<br>cancer, 181 tumours<br>at other sites, 1050<br>controls<br><br>Number of ST users<br>not stated | Limited information<br>on exposure, and no<br>information on dose-<br>response<br>relationships.<br><br>Sites included not<br>clearly stated, very<br>few cases confirmed<br>histologically, and<br>21% were diagnosed<br>solely on clinical<br>grounds.<br><br>OR adjusted for age<br>and location by<br>matching. | Among males, chewing of nass<br>associated with OR of 0.87,<br>(95% CI 0.5 to 1.52) –No<br>females chewed. | Prevalent cases, controls<br>randomly selected of<br>same age and sex and<br>resident in same village or<br>town. Many cases not<br>interviewed directly as too<br>ill or dead. Very high rate<br>of non-response (55% of<br>oesophageal cases, 39%<br>of other cancer cases<br>interviewed), partly due<br>to high frequencies of<br>incorrect addresses and<br>funding problems. Some<br>small discrepancies in<br>numbers reported within<br>paper.<br><br>Quality: F |

| <b>ID</b> | <b>Study<br/>Type of ST</b>                                                   | <b>Subjects, setting<br/>and<br/>years of<br/>recruitment</b>                                                                                                                                             | <b>Sample size<br/>No. of ST users</b>              | <b>Measurement of<br/>exposure,<br/>outcomes and<br/>confounders</b>                                                                                                                                                                                                                | <b>Findings or Results</b>                                                  | <b>Comments</b>                                                                                                                                                                   |
|-----------|-------------------------------------------------------------------------------|-----------------------------------------------------------------------------------------------------------------------------------------------------------------------------------------------------------|-----------------------------------------------------|-------------------------------------------------------------------------------------------------------------------------------------------------------------------------------------------------------------------------------------------------------------------------------------|-----------------------------------------------------------------------------|-----------------------------------------------------------------------------------------------------------------------------------------------------------------------------------|
| 45        | Whitaker et al<br>1979[128]<br><br>Chewing<br>tobacco – no<br>further details | Patients with oral<br>and pharyngeal<br>cancers in the two<br>main textile regions<br>of England (Christie<br>Hospital, Manchester,<br>Cookridge Hospital,<br>Leeds)<br><br>No. of ST users not<br>stated | 280 cases, 280<br>controls<br>10 cases, 10 controls | No further<br>information on ST<br>use.<br><br>Sites included clearly<br>stated (ICD – 8 141 -<br>tongue, 143-145<br>mouth, 146-149<br>pharynx, all SCC.<br><br>Age and sex<br>matched, but no<br>further control of<br>confounding and all<br>tobacco chewers<br>smoked cigarettes | No associations between<br>chewing tobacco and oral &<br>pharyngeal cancers | Main focus of study was<br>occupational risk, and<br>controls were patients<br>with primary malignancies<br>not known to be<br>associated with textile<br>work.<br><br>Quality: F |

### Cross sectional study

| ID | Study<br>Type of ST                                                                                                                                                               | Setting<br>Years of<br>recruitment                                                              | Sample size<br>No. of ST users                         | Measurement of<br>exposure, outcomes<br>and confounders                                                                                              | Findings or Results                                                                                                                                                                                                                                                                                                                                                                                                                   | Comments                                                                                                                                                                                                                                                                                                                                                |
|----|-----------------------------------------------------------------------------------------------------------------------------------------------------------------------------------|-------------------------------------------------------------------------------------------------|--------------------------------------------------------|------------------------------------------------------------------------------------------------------------------------------------------------------|---------------------------------------------------------------------------------------------------------------------------------------------------------------------------------------------------------------------------------------------------------------------------------------------------------------------------------------------------------------------------------------------------------------------------------------|---------------------------------------------------------------------------------------------------------------------------------------------------------------------------------------------------------------------------------------------------------------------------------------------------------------------------------------------------------|
| 46 | Salem et al<br>1984[129]<br><br>'Shammah' dipping,<br>includes powdered<br>tobacco leaves and<br>hydrated sodium<br>carbonates, placed in<br>buccal or lower labial<br>vestibule. | Adults over 15<br>living in Gizan<br>region of Saudi<br>Arabia<br><br>Time period not<br>stated | 661 of whom 187<br>used shammah,<br>474 were non-users | Type of ST described<br>in detail.<br><br>Examination of oral<br>mucosa and type of ST<br>use clearly described.<br><br>No control of<br>confounding | Oral mucosal lesions were<br>diagnosed in 78 individuals.<br>All of these had used<br>'shammah' consistently for<br>more than 5 years, and no<br>lesions were observed among<br>cigarette smokers. Biopsy<br>specimens were obtained<br>from 30 of these individuals,<br>and 2 had carcinoma in situ.<br>Seven had SCC, but these<br>were all obtained from a<br>separate group of hospital<br>patients, not the main study<br>group. | Investigator could not have<br>been 'blind' to shammah<br>use, as oral surfaces were<br>reported to be frequently<br>stained yellow to brown<br>with remnants of shammah<br>still in place. Response<br>rates to the survey not<br>reported, and only 30 of<br>the 78 found to have<br>lesions gave permission for<br>biopsy samples.<br><br>Quality: F |

## Other Cancers

### US studies Prospective Cohorts

| ID | Study and type of ST                               | Subjects, Setting and years of recruitment                                                                                                             | Sample size and No of ST users                                                                        | Measurement of exposure, outcomes and confounders                                                                                                                                                                                                                                                                                                                                                                                                                                       | Findings or Results                                                                                                                                                                                                                                                                                                                                                                                                                                                                                                                                                                                         | Comments                                                                                                                                                                                                                                                                          |
|----|----------------------------------------------------|--------------------------------------------------------------------------------------------------------------------------------------------------------|-------------------------------------------------------------------------------------------------------|-----------------------------------------------------------------------------------------------------------------------------------------------------------------------------------------------------------------------------------------------------------------------------------------------------------------------------------------------------------------------------------------------------------------------------------------------------------------------------------------|-------------------------------------------------------------------------------------------------------------------------------------------------------------------------------------------------------------------------------------------------------------------------------------------------------------------------------------------------------------------------------------------------------------------------------------------------------------------------------------------------------------------------------------------------------------------------------------------------------------|-----------------------------------------------------------------------------------------------------------------------------------------------------------------------------------------------------------------------------------------------------------------------------------|
| 47 | Heineman 1994[130]<br><br>Chewing T and oral Snuff | The study includes only men. Focuses on tobacco consumption and colorectal cancer association. US World War I veterans, 1954-1957, 26 years follow-up. | 248,046 veterans included in the follow-up.<br><br>Person years of follow up was 41,124 for ST users. | Tobacco use status was ascertained only at the beginning. Misclassification of exposure is highly possible and this may dilute the association. ST use was defined as 'only ST use without current or past smoking history'. Dose-response relation was studied.<br><br>Colorectal cancer deaths obtained from death certificates (underlying cause of death).<br><br>Most of the confounders were controlled in the analyses but data on the major confounder, diet was not available. | RR of deaths from colon ca for users of chewing tobacco or snuff versus never used tobacco: RR = 1.2 (95% CI 0.9 to 1.7).<br>For Rectal Ca: RR = 1.9 (95% CI 1.2 to 3.1) – adjusted for age, calendar time, year of questionnaire response, socioeconomic status and sedentary occupation.<br><br>Dose-response relation:<br>RR for colon ca; amount ST use versus never used tobacco':<br>Never heavy use RR = 2.0 (95% CI 1.4 to 3.0).<br>Ever heavy use RR=0.6 (95% CI 0.4 to 1.1).<br><br>For Rectal Ca:<br>Never heavy use RR = 2.5 (95% CI 1.3 to 5.0).<br>Ever heavy use RR=1.5 (95% CI 0.7 to 3.0). | Veterans who reported heavy ST use (defined as using 'practically every day') showed lower risk for both cancer outcomes than those who reported having used these products but never heavily.<br>This counter-intuitive finding is not discussed in the paper.<br><br>Quality: F |

| <b>ID</b> | <b>Study and type of ST</b>                 | <b>Subjects, Setting and years of recruitment</b>                                                                                                                                                                                                                | <b>Sample size and No of ST users</b>                                 | <b>Measurement of exposure, outcomes and confounders</b>                                                                                                                                                                                                                                                                                                                                                                                               | <b>Findings or Results</b>                                                                                   | <b>Comments</b> |
|-----------|---------------------------------------------|------------------------------------------------------------------------------------------------------------------------------------------------------------------------------------------------------------------------------------------------------------------|-----------------------------------------------------------------------|--------------------------------------------------------------------------------------------------------------------------------------------------------------------------------------------------------------------------------------------------------------------------------------------------------------------------------------------------------------------------------------------------------------------------------------------------------|--------------------------------------------------------------------------------------------------------------|-----------------|
| 48        | Zheng 1993[131]<br>Chewing T and oral Snuff | Focuses on risk factors for pancreatic cancer. In 1966 a cohort of white male policy holders of the Lutheran Brotherhood Insurance Society aged 35+ were included. They were mostly from California, Minnesota, Missouri & Dakota, US, followed up for 20 years. | 17,633 people included in the study<br><br>ST use 27,025 person years | Tobacco use status was ascertained only at the beginning. Misclassification of exposure is highly possible. ST use was not the main focus of the study. ST use was defined as 'ever use', no information was presented on intensity and duration. No dose-response relation analyses were performed.<br><br>Outcome (pancreatic cancer deaths), obtained from death certificates, coded by an oncologist.<br><br>RR was adjusted for most confounders. | Among 'ever users of ST' the age, alcohol, and smoking adjusted RR= 1.7 (95% CI 0.9-3.1) based on 16 deaths. | Quality: F      |

| ID | Study and type of ST                                       | Subjects, Setting and years of recruitment                                                                                                                                | Sample size and No of ST users                                                                                                                                    | Measurement of exposure, outcomes and confounders                                                                                                                                                                                                                                                                                                                                                                                                                                                                                                                                                                                                                                 | Findings or Results                                                                                                                                                                                                                                                                | Comments                                                                                                                                                                                                                                                                                                                                                                                                                                                       |
|----|------------------------------------------------------------|---------------------------------------------------------------------------------------------------------------------------------------------------------------------------|-------------------------------------------------------------------------------------------------------------------------------------------------------------------|-----------------------------------------------------------------------------------------------------------------------------------------------------------------------------------------------------------------------------------------------------------------------------------------------------------------------------------------------------------------------------------------------------------------------------------------------------------------------------------------------------------------------------------------------------------------------------------------------------------------------------------------------------------------------------------|------------------------------------------------------------------------------------------------------------------------------------------------------------------------------------------------------------------------------------------------------------------------------------|----------------------------------------------------------------------------------------------------------------------------------------------------------------------------------------------------------------------------------------------------------------------------------------------------------------------------------------------------------------------------------------------------------------------------------------------------------------|
| 49 | Zahm et al 1992[104]<br><br>Chewing tobacco and oral snuff | US military veterans, ages 31-84, who held active US government life-insurance policies in 1953 and died from soft tissue sarcoma (STS) by 1980.<br><br>Enrolled in 1953. | 293,958 of whom 248,046 provided tobacco use histories on a questionnaire in either 1954 or 1957<br><br>48,304 ST user (854,453 P-Y of ST use), 21 died from STS. | Frequent and infrequent ST use clearly defined. No information on any changes in ST use over time (23-26 years follow-up).<br><br>Concern over misclassification of outcomes for STS – 3 <sup>rd</sup> National Cancer Survey showed that only 54.8% of those diagnosed with STS have STS on their death certificate. In this study, only 56.3% of persons with STS on death certificates had diagnosis confirmed by hospital records. Histologic type and tumour location were unspecified on most veterans death certificates – high and low risk sub-groups of STS were probably combined and therefore risks diluted.<br><br>Results adjusted for age and calendar time only. | Veterans who ever chewed tobacco or used snuff had a non-significant 40% excess of STS compared with those who never used any tobacco products (RR=1.4, 95% CI 0.8 to 2.6). Highest risk was for frequent users during first 10 years of follow-up (RR = 3.4, 95% CI 1.1 to 10.7). | Most veteran users of chewing tobacco or snuff also used other tobacco products. Higher risks found in ex-users than current users, and higher in those who started young, but risk did not increase with duration of use. Items left blank on questionnaire were coded as 'NO' which may underestimate risks.<br><br>ST users also used other cigarette products – there were no deaths among the 2,308 veterans who used only ST products.<br><br>Quality: F |

| ID | Study and type of ST                               | Subjects, Setting and years of recruitment                                                                              | Sample size and No of ST users                                                                        | Measurement of exposure, outcomes and confounders                                                                                                                                                                                                                                                                                                    | Findings or Results                                                                                                                                                                                                                                                              | Comments                                                                                                                                                                          |
|----|----------------------------------------------------|-------------------------------------------------------------------------------------------------------------------------|-------------------------------------------------------------------------------------------------------|------------------------------------------------------------------------------------------------------------------------------------------------------------------------------------------------------------------------------------------------------------------------------------------------------------------------------------------------------|----------------------------------------------------------------------------------------------------------------------------------------------------------------------------------------------------------------------------------------------------------------------------------|-----------------------------------------------------------------------------------------------------------------------------------------------------------------------------------|
| 50 | Heineman 1992[132]<br><br>Chewing T and oral Snuff | The study includes only men. Focuses on tobacco consumption and myeloma association. US World War I veterans. 1954-1957 | 248,046 veterans included in the follow-up.<br><br>Person years of follow up was 41,124 for ST users. | ST use is not defined, no information on dose-response relationships. Smoking status was ascertained only at the baseline. Follow-up information was complete for 96% and death certificates obtained 97% of those identified as deceased. Cause of death was detected from death certificates (ICD8) No attempt to control for confounding factors. | RR of deaths from Multiple Myeloma for users of chewing tobacco or snuff versus never used tobacco: (RR = 1.0 95% CI 0.4 to 2.3). Risk did not increase with heavier use of CT or snuff (used occasionally: RR=1.7; and used 'practically everyday': RR=0.6) all CIs included 1. | US Veterans cohort - no information on any changes in ST use or cigarette smoking over time (23-26 years follow-up). High potential for misclassification bias.<br><br>Quality: F |
| 51 | Kneller 1991[133]<br><br>Chewing T and oral Snuff  | Stomach ca in white men of US, Norwegian and German descent living in 8 US cities<br><br>1966-67.                       | 17,818 people included in the study<br><br>1420 persons used ST                                       | Outcome measured using death certificates – coded by a nosologist.<br><br>ST use is not defined, no information on dose-response relationships.<br><br>Limited attempts to control for confounding factors (5-year age group, stratification by pack-years of smoking).                                                                              | No statistically significant association was seen among current or former users of ST compared with tobacco abstiners (18 cases; RR=2.3; 95% CI 0.98 to 5.22). Stratification by pack years of smoking reduced this risk estimate (RR=1.6; 95% CI 0.58 to 4.50).                 | Quality: F                                                                                                                                                                        |

| <b>ID</b> | <b>Study and type of ST</b>                  | <b>Subjects, Setting and years of recruitment</b>                                                                                                                                                                     | <b>Sample size and No of ST users</b>                | <b>Measurement of exposure, outcomes and confounders</b>                                                                                                                                                                                                                                                                                  | <b>Findings or Results</b>                                                | <b>Comments</b>                                                                                                                                                                                          |
|-----------|----------------------------------------------|-----------------------------------------------------------------------------------------------------------------------------------------------------------------------------------------------------------------------|------------------------------------------------------|-------------------------------------------------------------------------------------------------------------------------------------------------------------------------------------------------------------------------------------------------------------------------------------------------------------------------------------------|---------------------------------------------------------------------------|----------------------------------------------------------------------------------------------------------------------------------------------------------------------------------------------------------|
| 52        | Hsing, 1991[134]<br>Chewing T and oral Snuff | US veterans who served in US Army during 1917-1940 and were aged 31-84 in 1953 and responded to the questionnaires in 1954 and 1957. They were followed-up for 26 years for prostate cancer mortality.<br>250,000 men | 250,000 men<br><br>Number of ST users was not given. | ST use was defined as 'only ST use without current or past smoking history'. No information on dose-response relationships.<br><br>Death certificates - follow-up information was complete for 96%, certificates obtained for 98% of those identified as deceased.<br><br>Limited control for confounders (only age and smoking history). | Age adjusted RR of death from prostate cancer: 1.17 (95% CI 0.88 to 1.56) | In total there were 4,607 deaths in the cohort, 48 of them in the ST user group. Tobacco use status was ascertained only at the beginning – high potential for misclassification bias.<br><br>Quality: F |

| ID | Study and type of ST                             | Subjects, Setting and years of recruitment                                                                                                                                                                                                                                          | Sample size and No of ST users                                                                                                                            | Measurement of exposure, outcomes and confounders                                                                                                                                                                                                                                                                                                                                                                    | Findings or Results                                                                                                                                                                                                                                                                                                                                                               | Comments                                                                                                                                           |
|----|--------------------------------------------------|-------------------------------------------------------------------------------------------------------------------------------------------------------------------------------------------------------------------------------------------------------------------------------------|-----------------------------------------------------------------------------------------------------------------------------------------------------------|----------------------------------------------------------------------------------------------------------------------------------------------------------------------------------------------------------------------------------------------------------------------------------------------------------------------------------------------------------------------------------------------------------------------|-----------------------------------------------------------------------------------------------------------------------------------------------------------------------------------------------------------------------------------------------------------------------------------------------------------------------------------------------------------------------------------|----------------------------------------------------------------------------------------------------------------------------------------------------|
| 53 | Hsing 1990[135]<br>Chewing T and oral Snuff      | In 1966 a cohort of white male policy holders of the the Lutheran Brotherhood Insurance Society who were 35+ included into study. They were followed-up for prostate ca mortality. They were mostly from Minnesota- US, had Norwegian and Scandinavian heritage, rural and farmers. | 17633 men<br><br>ST use only=4,025 py <sup>3</sup><br><br>ST+cigarettes =7,613py<br><br>ST+pipe/cigar =2,729<br><br>ST +cigarettes + pipe/cigar=22,896 py | Information on tobacco habits was ascertained only at the beginning. Misclassification of exposure is highly possible. No information was given about intensity and duration of ST use. Dose-response relation was not analysed.<br><br>Underlying cause of death obtained from death certificates.<br><br>Analyses controlled for age, education, smoking, alcohol, diet, marital status and rural/urban residence. | RR of deaths from Prostate Ca for 'ever users of chewing tobacco or snuff versus never used tobacco': RR = 4.5 (95% CI 2.1 to 9.7).<br><br>RR of deaths from Prostate Ca for 'ST user and cigarettes versus never used tobacco': RR =2.9 (95% CI 1.3 to 6.5).<br><br>RR of deaths from Prostate Ca for 'any tobacco user versus never used tobacco': RR =1.8 (95% CI 1.1 to 2.9). | Loss to follow-up was high (23%) due to lapsed policies. Study group may not represent US population.<br><br>Quality: F                            |
| 54 | Bjelke 1982[105]<br><br>Chewing T and oral Snuff | Norwegian men and US men                                                                                                                                                                                                                                                            | 12,945 Norwegian and 16,930 American men followed up 10 years for cancer mortality<br>Number of ST users not given                                        | Abstract – no information on measurements of outcome, exposure or confounders.                                                                                                                                                                                                                                                                                                                                       | Men with ST habit have an increased risk of cancer of the oesophagus and pancreas. The results were consistent with a multiplicative effect of alcohol and chewing T and using snuff. (No numerical information)                                                                                                                                                                  | This is an abstract from a congress presentation. There is not sufficient information about the methodology, results and discussion.<br>Quality: F |

<sup>3</sup> py – Person-Years

| <b>ID</b> | <b>Study and type of ST</b>                                     | <b>Subjects, Setting and years of recruitment</b>                  | <b>Sample size and No of ST users</b>                        | <b>Measurement of exposure, outcomes and confounders</b>                       | <b>Findings or Results</b>                                                                                                                                                         | <b>Comments</b>                                                                                               |
|-----------|-----------------------------------------------------------------|--------------------------------------------------------------------|--------------------------------------------------------------|--------------------------------------------------------------------------------|------------------------------------------------------------------------------------------------------------------------------------------------------------------------------------|---------------------------------------------------------------------------------------------------------------|
| 55        | Winn et al. 1982[106]<br><br>ST use (chewing tobacco and snuff) | DORN study - US veterans with life Insurance Policies. 1954 - 1969 | Approximately 300,000.<br><br>Number of ST users not stated. | Abstract – no information on measurements of outcome, exposure or confounders. | In the absence of smoking, ST related SMRs were higher for cancer of digestive system (137), cancer of oesophagus (228), cancer of stomach (151), pancreas (165), and liver (281). | Abstract only - small numbers for some outcomes (only one death from cancer of oesophagus).<br><br>Quality: F |

## Case-Control Studies

| ID | Study and type of ST                                      | Subjects, Setting and years of recruitment                                                                                                                                                                                                                                                                                                                                                                                                    | Sample size and No of ST users                                 | Measurement of exposure, outcomes and confounders                                                                                                                                                                                                                                                                                                                                             | Findings or Results                                                                                                                                                                                                                                                | Comments                                                                                                                                                                                                                                                                                                                                                                     |
|----|-----------------------------------------------------------|-----------------------------------------------------------------------------------------------------------------------------------------------------------------------------------------------------------------------------------------------------------------------------------------------------------------------------------------------------------------------------------------------------------------------------------------------|----------------------------------------------------------------|-----------------------------------------------------------------------------------------------------------------------------------------------------------------------------------------------------------------------------------------------------------------------------------------------------------------------------------------------------------------------------------------------|--------------------------------------------------------------------------------------------------------------------------------------------------------------------------------------------------------------------------------------------------------------------|------------------------------------------------------------------------------------------------------------------------------------------------------------------------------------------------------------------------------------------------------------------------------------------------------------------------------------------------------------------------------|
| 56 | Brown <i>et al</i> 1992[136]<br><br>ST use not described. | All newly diagnosed cases of leukaemia among white men aged 30 years or above from Iowa Health Registry, a member of SEER, or from a special surveillance network of hospitals and pathology laboratories instituted in Minnesota<br><br>Controls selected by random digit dialling, Medicare records, and state death certificate files, and frequency matched by 5-year age group, state of residence and vital status.<br><br>1981 to 1984 | 578 cases, 820 controls<br><br>ST users: 24 cases 23 controls. | ST use is not a main focus of the study and is not described.<br><br>Cases from population-based cancer registry, definitions clearly stated and slides reviewed by regional pathologist.<br><br>Control of confounding was limited to state and age group, but it is stated that education, occupational exposures and family history of ca were not confounders (& smoking by restriction). | The OR for all leukaemias (compared with non-tobacco users) was 1.8, 95% CI 0.9 to 3.3. No statistically significant relationships for any sub-type, but there are small numbers of cases for each, and risks above unity for all but one of the sub-types studied | Response rates high (86% ca, between 77% and 79% for different co series<br>Dead controls (n=425) were excluded from main analyses since there is evidence that smokers are over-represented in such groups.<br><br>Leukaemia subtypes studied include acute non-lymphocytic, chronic myelogenous, chronic lymphocytic, acute lymphocytic, myelodysplasia.<br><br>Quality: F |

| ID | Study and type of ST                              | Subjects, Setting and years of recruitment                                                                                                                                                                                                                                              | Sample size and No of ST users                                                                                                                        | Measurement of exposure, outcomes and confounders                                                                                                                                                                     | Findings or Results                                                                                                                                                                                                                                                                                                                                        | Comments                                                                                                                                                                                                                                                                                                                                                                                                            |
|----|---------------------------------------------------|-----------------------------------------------------------------------------------------------------------------------------------------------------------------------------------------------------------------------------------------------------------------------------------------|-------------------------------------------------------------------------------------------------------------------------------------------------------|-----------------------------------------------------------------------------------------------------------------------------------------------------------------------------------------------------------------------|------------------------------------------------------------------------------------------------------------------------------------------------------------------------------------------------------------------------------------------------------------------------------------------------------------------------------------------------------------|---------------------------------------------------------------------------------------------------------------------------------------------------------------------------------------------------------------------------------------------------------------------------------------------------------------------------------------------------------------------------------------------------------------------|
| 57 | Brown et al 1992[137]<br><br>ST use not described | All newly diagnosed cases of Non Hodgkin's lymphoma (NHL) or multiple myeloma (MM). Case and control selection as above (Brown et al 1992[137])                                                                                                                                         | NHL: 622 cases, 820 controls<br>MM: 173 cases, 650 controls<br><br>ST users (NHL): 19 cases, 23 controls<br>ST users (MM): 5 cases, 8 controls        | As above (Brown et al 1992)[137]                                                                                                                                                                                      | OR for ST use of all NHL subtypes was 1.3 (95% CI 0.7 to 2.5). OR for multiple myeloma was 1.9 (95% CI 0.5 to 6.6).                                                                                                                                                                                                                                        | Number of cases and controls are small, and ORs therefore imprecisely estimated.<br><br>Quality: F                                                                                                                                                                                                                                                                                                                  |
| 58 | Zahm et al 1989[138]                              | All newly diagnosed soft-tissue sarcoma, non-Hodgkin's lymphoma and Hodgkin's disease among white male Kansas residents aged 21+<br><br>General population controls were selected by random digit dialling (<64 years) or Medicare file if over 65, matched by age.<br><br>1976 to 1982 | 133 cases, 948 controls; 4 upper GI tract cases, 5 lung, pleura and thorax cases; 3 head, neck and face cases, 16 other<br><br>28 cases, 127 controls | No information collected on duration, amount, or age at starting ST use.<br><br>Sites included clearly defined by ICD codes, all confirmed histologically.<br><br>Control of confounding limited (age adjusted only). | For all cases combined, OR = 1.8 (95% CI 1.1 to 2.9). No statistically significant associations for individual cancer types or sites e.g. upper GI tract (OR = 3.3 95% CI 0.8 to 12.6), lung, pleura & thorax (OR = 3.1, 95% CI 0.9 to 10.5), head, face and neck (OR = 2.4, 95% CI, 0.5 to 10.2), other areas of the body (OR = 1.4, 95% CI, 0.7 to 2.5). | Tobacco chewing histories taken up until a key date 5 years prior to cancer diagnosis for cases (range 1971 to 1977) and 1977 for controls – who therefore had more opportunity to report exposures than cases, which may dilute risk estimates<br>Overall response rate 93%. For dead cases, controls were selected from Kansas state mortality files and additionally matched on year of death.<br><br>Quality: F |

| ID | Study and type of ST                                  | Subjects, Setting and years of recruitment                                                                                                                                                                                                                        | Sample size and No of ST users                                                                                                                   | Measurement of exposure, outcomes and confounders                                                                                                                                                                                   | Findings or Results                                                                                                                                                                    | Comments                                                                                                                                          |
|----|-------------------------------------------------------|-------------------------------------------------------------------------------------------------------------------------------------------------------------------------------------------------------------------------------------------------------------------|--------------------------------------------------------------------------------------------------------------------------------------------------|-------------------------------------------------------------------------------------------------------------------------------------------------------------------------------------------------------------------------------------|----------------------------------------------------------------------------------------------------------------------------------------------------------------------------------------|---------------------------------------------------------------------------------------------------------------------------------------------------|
| 59 | Burch 1989[139]<br><br>Oral Snuff and chewing tobacco | <p>Cases of primary bladder cancer diagnosed during 1979-82, aged 35-79 yrs and age, sex &amp; area of residence matched controls, randomly selected from population included.</p> <p>The study was carried out in Alberta and South central Ontario, Canada.</p> | <p>826 cases and 792 controls.</p> <p>9 cases and 18 controls were snuff users. 26 of the cases and 34 of the controls used chewing tobacco.</p> | <p>ST use was defined ever/never, no information about length and intensity of consumption or concomitant smoking.</p> <p>Outcome described as 'primary bladder cancer'.</p> <p>OR adjusted for lifetime cigarette consumption.</p> | <p>Analyses for ST were restricted to men as women did not use ST.</p> <p>OR snuff use = 0.47, (95% CI 0.21 to 1.07).</p> <p>OR chewing tobacco use = 0.60, (95% CI 0.34 to 1.06).</p> | <p>High non-response rates in cases and controls (33% &amp; 56% respectively). Small numbers of cases and controls used ST.</p> <p>Quality: F</p> |

| ID | Study and type of ST                                    | Subjects, Setting and years of recruitment                                                                                               | Sample size and No of ST users                                                                                                                                              | Measurement of exposure, outcomes and confounders                                                                                                                                                                                                                        | Findings or Results                                                                                                                                                                                                                                                                                                                                                                                                                                                                                                           | Comments                                                                                                                                                                                                                                                                                                                                                          |
|----|---------------------------------------------------------|------------------------------------------------------------------------------------------------------------------------------------------|-----------------------------------------------------------------------------------------------------------------------------------------------------------------------------|--------------------------------------------------------------------------------------------------------------------------------------------------------------------------------------------------------------------------------------------------------------------------|-------------------------------------------------------------------------------------------------------------------------------------------------------------------------------------------------------------------------------------------------------------------------------------------------------------------------------------------------------------------------------------------------------------------------------------------------------------------------------------------------------------------------------|-------------------------------------------------------------------------------------------------------------------------------------------------------------------------------------------------------------------------------------------------------------------------------------------------------------------------------------------------------------------|
| 60 | Slattery 1988[60]<br><br>Oral snuff and chewing tobacco | White, male, 21-84 yrs old, newly diagnosed bladder cancer cases between 1977-83, from Utah cancer registration and population controls. | 332 cases and 686 age matched (categorically) pop controls. 16 of the cases and 32 of the controls used snuff. 21 of the cases and 45 of the controls used chewing tobacco. | ST use was not defined in detail (only ever/never).<br><br>Cases were defined according to ICD-9 and confirmed histologically.<br><br>Study restricted to white men and stratified by smoking status but except for this no attempt was made to control for confounders. | Crude OR of snuff use for bladder cancer compared with non-users (OR=1.0, 95%CI 0.54 to 1.85)<br>OR of snuff use for bladder ca in smokers was 0.70, 95% CI 0.36 to 1.35.<br><br>OR of snuff use for bladder ca in never smokers was 2.73, 95% CI 0.48 to 15.57.<br><br>Crude OR of chewing tobacco for bladder ca: was 1.08, 95% CI 0.63 to 1.87). OR of chewing tobacco for bladder ca in smokers was 1.22, 95% CI 0.68 to 2.19). OR of chewing tobacco for bladder ca in never smokers: was OR=2.78, 95% CI 0.38 to 20.20. | Numbers of snuff users or tobacco chewers were small in cases and controls. Stratification demonstrated possible interactions between smoking and ST use, (OR for association of snuff use and chewing tobacco with bladder cancer are both higher among those who have never smoked) but these associations are not statistically significant.<br><br>Quality: A |

| ID | Study and type of ST                                                                                         | Subjects, Setting and years of recruitment                                                                 | Sample size and No of ST users                                                                                    | Measurement of exposure, outcomes and confounders                                                                                                                                                                                    | Findings or Results                                                                                                                                                                                                                                                                                                                                                                                                                                                                                                                                                                                                                                                           | Comments                                                                                                                                                                                                                                                                                                                    |
|----|--------------------------------------------------------------------------------------------------------------|------------------------------------------------------------------------------------------------------------|-------------------------------------------------------------------------------------------------------------------|--------------------------------------------------------------------------------------------------------------------------------------------------------------------------------------------------------------------------------------|-------------------------------------------------------------------------------------------------------------------------------------------------------------------------------------------------------------------------------------------------------------------------------------------------------------------------------------------------------------------------------------------------------------------------------------------------------------------------------------------------------------------------------------------------------------------------------------------------------------------------------------------------------------------------------|-----------------------------------------------------------------------------------------------------------------------------------------------------------------------------------------------------------------------------------------------------------------------------------------------------------------------------|
| 61 | <p>Goodman, 1986[63]</p> <p>Chewing tobacco and oral snuff</p> <p>At least once a day and 1 year or more</p> | <p>Cancer of the kidney from 18 hospitals of 6 cities in US were included in the study.</p> <p>1977-83</p> | <p>267 cases and 267 controls</p> <p>13 male cases, 4 male controls and 1 female control used chewing tobacco</p> | <p>ST use is defined as ever-never use. No information on dose-response relationships.</p> <p>Incident cases of kidney adenocarcinoma, histologically confirmed.</p> <p>Adequate matching, analysing and control of confounding.</p> | <p>The crude OR for renal cell cancer in ever tobacco chewers versus never chewers: (OR = 4.0, 95% CI 1.1 to 14.2) for men. OR was not calculated for women since no females cases chewed.</p> <p>In logistic regression model (BMI, decaffeinated coffee use, pack years smoking, and interaction term for chewing tobacco and pack years smoking), the adjusted OR for chewing tobacco was 0.9 (95% CI 0.1 to 5.1).</p> <p>Positive interaction between smoking and chewing tobacco for renal cell cancer. OR for smoking (pack-years) was 1.1 (95% CI 0.9 to 1.4), chewing tobacco use 0.9 as above, but pack-years x chewing tobacco OR = 26.0 (95% CI 4.4 to 153.0).</p> | <p>Small number of cases and controls used chewing tobacco without concurrent smoking. Interaction between chewing tobacco and pack years of smoking was checked. The fitted OR for persons who chewed tobacco and had 30 pack years of smoking compared to never users was 26 (95% CI 4.4 to 153.0).</p> <p>Quality: A</p> |

| <b>ID</b> | <b>Study and type of ST</b>                            | <b>Subjects, Setting and years of recruitment</b>                                   | <b>Sample size and No of ST users</b>                         | <b>Measurement of exposure, outcomes and confounders</b>                                                                                                                                                                                                                                                                                                                                            | <b>Findings or Results</b>                                                                                                                                                                                                                                                                      | <b>Comments</b>                                                                                                                                                                      |
|-----------|--------------------------------------------------------|-------------------------------------------------------------------------------------|---------------------------------------------------------------|-----------------------------------------------------------------------------------------------------------------------------------------------------------------------------------------------------------------------------------------------------------------------------------------------------------------------------------------------------------------------------------------------------|-------------------------------------------------------------------------------------------------------------------------------------------------------------------------------------------------------------------------------------------------------------------------------------------------|--------------------------------------------------------------------------------------------------------------------------------------------------------------------------------------|
| 62        | Hartge 1985[140]<br><br>Chewing tobacco and oral snuff | Population based case-control study. National bladder ca study, US.<br><br>1977-78. | 2982 cases, 5782 controls<br><br>Number of ST users not given | ST use was defined as 'ever used for 6 months or more in life' no information provided on dose-response relationships.<br><br>Histologically confirmed bladder ca. Registered to 9 cancer registries of NCI.<br><br>ST cancer association analysed in men who had never smoked cigarettes, and basic confounders (race, age, sex, residence, pipes, cigars) were included in multivariate analysis. | Among men who never smoked, snuff dippers and tobacco chewers were not at increased risk for bladder cancer (OR for snuff use = 0.77; 95% CI 0.38 to 1.56), and for chewing tobacco (OR= 1.02; 95% CI 0.67 to 1.54).<br><br>OR adjusted for race, age, sex, residence, use of pipes and cigars. | The study focuses on non-cigarette tobacco use and bladder ca association. Since non-cigarette tobacco use was small in women the analyses were restricted to men.<br><br>Quality: F |

| ID | Study and type of ST                                                                                  | Subjects, Setting and years of recruitment                                                                               | Sample size and No of ST users                                                                                                                            | Measurement of exposure, outcomes and confounders                                                                                                                                                                                                                                                                                   | Findings or Results                                                                                                                                                                                                                                                     | Comments                                                                                                                                                                                                          |
|----|-------------------------------------------------------------------------------------------------------|--------------------------------------------------------------------------------------------------------------------------|-----------------------------------------------------------------------------------------------------------------------------------------------------------|-------------------------------------------------------------------------------------------------------------------------------------------------------------------------------------------------------------------------------------------------------------------------------------------------------------------------------------|-------------------------------------------------------------------------------------------------------------------------------------------------------------------------------------------------------------------------------------------------------------------------|-------------------------------------------------------------------------------------------------------------------------------------------------------------------------------------------------------------------|
| 63 | Howe 1980[141]<br><br>Chewing tobacco                                                                 | Newly diagnosed bladder cancer cases from 3 provinces of Canada 1974-77                                                  | (480 m and 152 w) and age-sex matched neighbourhood controls included (632 pairs=1264 persons).<br><br>Number of ST users was not presented in the paper. | ST use was not main focus of study and wasn't defined well (ever/never).<br><br>Cases from cancer registries and co-operating pathologists & urologists.<br><br>Limited results were presented for ST, only crude OR for bladder ca. States that controlling for cigarette smoking did not change the estimate (no data presented). | The OR of Chewing tobacco use (ever vs never) for bladder ca was 0.90 (95% CI 0.5 to 1.6). This estimate was calculated only for men.                                                                                                                                   | Study focuses on tobacco use, occupation, coffee, various nutrients and bladder ca association. Small numbers of ST users among both cases and controls.<br><br>Quality: F                                        |
| 64 | Williams and Horm, 1977[109]<br><br>Chewing tobacco and snuff (cans or plugs per week * years of use) | Part of the Third National Cancer Survey – a random 10% sample of all incident cases in survey areas in the US. 1969-72. | 7518 cases (controls are inter-case comparisons)<br><br>ST users: Males, 132 cases 169 controls. Females 5 cases 53 controls                              | Some information and frequency and quantity of ST used.<br><br>Sites clearly described (though not in this paper).<br><br>Basic confounders (age, sex, race and cigarette smoking) are considered, but could not control for cigar / pipe smoking                                                                                   | A relationship was 'suggested' for bladder cancer (OR 1.61 and 1.78 in males for 1-50 and >50 'chewing years' respectively; OR = 2.43 in females with > 50 chewing years) and lymphoma (e.g. OR = 1.31 and 3.05 at each exposure level in males for Hodgkin's disease). | Controls are cancers from sites not thought related to tobacco or alcohol consumption in the TCNS – may dilute estimates of risk. Very high non-response bias – only 67% of sample interviewed.<br><br>Quality: R |

| <b>ID</b> | <b>Study and type of ST</b>                                         | <b>Subjects, Setting and years of recruitment</b>                                                                                                                                                        | <b>Sample size and No of ST users</b>                                                                                                                                                                                                                         | <b>Measurement of exposure, outcomes and confounders</b>                                                                                                                                                                                                                                                                                                                     | <b>Findings or Results</b>                                                                                                                                                                                                                                                                                         | <b>Comments</b>                                                                                                                                                                                       |
|-----------|---------------------------------------------------------------------|----------------------------------------------------------------------------------------------------------------------------------------------------------------------------------------------------------|---------------------------------------------------------------------------------------------------------------------------------------------------------------------------------------------------------------------------------------------------------------|------------------------------------------------------------------------------------------------------------------------------------------------------------------------------------------------------------------------------------------------------------------------------------------------------------------------------------------------------------------------------|--------------------------------------------------------------------------------------------------------------------------------------------------------------------------------------------------------------------------------------------------------------------------------------------------------------------|-------------------------------------------------------------------------------------------------------------------------------------------------------------------------------------------------------|
| 65        | Wynder and Stellman 1977[110]<br><br>Chewing tobacco and oral snuff | Patients with cancer of lung (Kreyberg types I and II), larynx, oesophagus or bladder from 20 hospitals in 8 American Cities – New York, Houston, Los Angeles, Birmingham, Miami, New Orleans. 1969-1975 | 3716 cases, and 3716 controls<br>Distribution of cases by site:<br>Lung I – 91; Lung II – 26; oral cavity 61; larynx 46; oesophagus 20; bladder 47.<br>291 cases, 233 controls had ever used chewing tobacco,<br>79 cases and 69 controls had ever used snuff | No description or definition of ST use.<br><br>Sites included clearly stated (lung cancer ICD 162, oesophagus 150, bladder 188) and histologically proven.<br><br>Limited consideration of confounders (age, race and city), but smoking habits of users of chewing tobacco did not differ significantly from non-users of chewing tobacco in any cancer diagnosis category. | OR among snuff users ranged from 0.5 (Lung II cancer) to 1.7 (oesophagus) but none were significant. Re-analysis of raw numbers in EPI-INFO found one statistically significant association for Lung I cancer, crude OR = 1.43, 95% CI 1.09 to 1.86). Lung cancer (type I) had the largest number of cases (n=91). | Controls were from same hospitals but without tobacco-related disease, clearly defined. Insufficient cases to demonstrate increased risk due to chewing tobacco or snuff use alone.<br><br>Quality: F |

| <b>ID</b> | <b>Study and type of ST</b>                           | <b>Subjects, Setting and years of recruitment</b>                                                                                                                                                                                                                                         | <b>Sample size and No of ST users</b>                                                                       | <b>Measurement of exposure, outcomes and confounders</b>                                                                                                                                    | <b>Findings or Results</b>                                                                                                                                                                | <b>Comments</b>                                                                                                                                                                                                            |
|-----------|-------------------------------------------------------|-------------------------------------------------------------------------------------------------------------------------------------------------------------------------------------------------------------------------------------------------------------------------------------------|-------------------------------------------------------------------------------------------------------------|---------------------------------------------------------------------------------------------------------------------------------------------------------------------------------------------|-------------------------------------------------------------------------------------------------------------------------------------------------------------------------------------------|----------------------------------------------------------------------------------------------------------------------------------------------------------------------------------------------------------------------------|
| 66        | Cole, 1971[142]<br><br>Oral Snuff and chewing tobacco | Incident, histologically confirmed transitional or SCC of lower urinary tract cases and sex-age matched population controls. Participants were aged 20- 89 years old, from 96 hospitals in Boston Brockton Standard metropolitan Statistical Areas and 15 hospitals from peripheral areas | 470 cases<br>500 controls<br><br>In cases only 3 persons used snuff and 46 cases were using chewing tobacco | ST use is not clearly defined, no information on dose-response relationships.<br><br>No ICD codes, but most cases confirmed histologically.<br><br>Limited control for confounding factors. | There were no differences between observed and expected numbers of cases (lower urinary tract cancer) who had used snuff (3 vs 2.99) or chewing tobacco (46 vs 42.3) – restricted to men. | ST use was not main focus of study.<br><br>Limited results were presented about snuff use and chewing tobacco.<br><br>Results were not properly analysed (ie methods for matched designs were not used).<br><br>Quality: F |

### Cross sectional Studies

| ID | Study and type of ST                               | Subjects, Setting and years of recruitment                                                                                                                               | Sample size<br>No of ST users                                                                                                           | Measurement of exposure, outcomes and confounders                                                                                                                                                                    | Findings or Results                                                                                                                                                                                                                                                                                                                                                                                                                                                     | Comments                                                                                                                                                                                                                                                                                                                           |
|----|----------------------------------------------------|--------------------------------------------------------------------------------------------------------------------------------------------------------------------------|-----------------------------------------------------------------------------------------------------------------------------------------|----------------------------------------------------------------------------------------------------------------------------------------------------------------------------------------------------------------------|-------------------------------------------------------------------------------------------------------------------------------------------------------------------------------------------------------------------------------------------------------------------------------------------------------------------------------------------------------------------------------------------------------------------------------------------------------------------------|------------------------------------------------------------------------------------------------------------------------------------------------------------------------------------------------------------------------------------------------------------------------------------------------------------------------------------|
| 67 | Spangler 2001[143]<br><br>Chewing T and oral Snuff | Women from Cherokee tribal land, US interviewed 1990-91.                                                                                                                 | 1408 women included and 292 women reported using ST                                                                                     | No information about duration and intensity of ST.<br><br>Breast ca. diagnosis self-reported.<br><br>No control of confounders.                                                                                      | OR of ST for breast ca diagnosed before 55 years age = 7.79 (95% CI 1.05 to 66.0)<br>OR of ST for breast ca diagnosed after 55 years age= 0.0 (95% CI 0.0 to 5.67)                                                                                                                                                                                                                                                                                                      | A cross sectional study based on self reported data. Small study population and small number of breast cancer cases.<br><br>Quality: F                                                                                                                                                                                             |
| 68 | Sterling 1992[144]<br><br>Chewing T and oral Snuff | The study analyses the link between ST use and oral and digestive organ cancers in a cross sectional design.<br><br>People who died in 1986 in US were study population. | 16,598. Number of decedents by lifetime use of ST > 100 times estimated using information from 1986 National Mortality Follow-up Survey | Dose-response relationship was considered.<br><br>Outcome from death certificates.<br><br>Potential confounders included into multivariate analyses (adjusted for sex, race, age, smoking, drinking and occupation). | RR for all cancer mortality<br><br>RR=0.37, 95% CI 0.26 to 0.54 among those who had ever used ST 100 to 9,999 times, and RR 0.88, 95% CI 0.69 to 1.12 among those who used ST over 10,000 times.<br>No statistically significant relationships for oral cancers.<br><br>RR for cancer of digestive organs among those who had ever used ST 100 to 9,999 times, RR 0.15, 95% CI 0.04 to 0.52 and among those who used ST over 10,000 times RR 0.61 95% CI 0.34 to 1.10). | Information about tobacco and other factors obtained from their families. Recall bias is possible. No validation for exposure information. Non-response rate was 11.4% to questionnaire.<br><br>Reference category are those who used ST 0 to 99 times (rather than never-users) which could underestimate risk.<br><br>Quality: F |

## Scandinavian Studies

### Prospective cohort

| ID | Study and type of ST                  | Subjects, Setting and years of recruitment                                                                                                                                                                                                                                                                                                                                                     | Sample size and No of ST users                                                      | Measurement of exposure, outcomes and confounders                                                                                                                                                                                                                                                                                                                                           | Findings or Results                                                                                                                                                                                                                                                                                                                                                                                                                                                                                                                                             | Comments                                                                                                                                                |
|----|---------------------------------------|------------------------------------------------------------------------------------------------------------------------------------------------------------------------------------------------------------------------------------------------------------------------------------------------------------------------------------------------------------------------------------------------|-------------------------------------------------------------------------------------|---------------------------------------------------------------------------------------------------------------------------------------------------------------------------------------------------------------------------------------------------------------------------------------------------------------------------------------------------------------------------------------------|-----------------------------------------------------------------------------------------------------------------------------------------------------------------------------------------------------------------------------------------------------------------------------------------------------------------------------------------------------------------------------------------------------------------------------------------------------------------------------------------------------------------------------------------------------------------|---------------------------------------------------------------------------------------------------------------------------------------------------------|
| 69 | Heuch 1983[97]<br><br>Chewing tobacco | In 1964-67 tobacco habits of the study population defined. The study population was a set of 3 groups: 1) a sample of pop recorded in 1960 census 2) a set of brothers, living in Norway, of a sample of migrants to the US 3) spouses-siblings of individuals interviewed for a case control study of gastrointestinal ca.<br><br>Followed up for 11 –14 yrs for pancreatic ca.<br><br>Norway | 16,713 persons were included in the study.<br><br>Number of ST users not presented. | ST use was defined as 'never used group, former users and regular users' but no information was provided about those with several tobacco habits.<br><br>Outcomes assessed using cancer register and death registry (only 62% of cases histologically verified).<br><br>ORs were adjusted for region, place of residence (urban/rural), age and sex, and some analyses smoking and alcohol. | OR chewing tobacco for <u>all pancreas cancers</u> (n=63) was 1.34. No trend in pancreas ca cases from never used group, former users and regular users p=0.21<br><br>OR of chewing tobacco for <u>histologically verified</u> pancreas cancers was 2.20 (95% CI 0.89 to 5.4) Positive trend in pancreas ca cases p=0.045.<br><br>Among men: OR of chewing tobacco for histologically verified pancreas cancers was= 2.31. No trend in pancreas ca cases, p=0.067<br><br>OR= 2.85 and test for trend, p=0.06 among men after adjustment for alcohol and smoking | 16,713 persons were followed up for 11–14 yrs for pancreatic ca. In total 63 cases occurred, only 39 of them histologically verified.<br><br>Quality: F |

### Case-Control Studies

| ID | Study and type of ST                                                                                                | Subjects, Setting and years of recruitment                                                                                                                                                                                                      | Sample size and No of ST users                                                                                                                                | Measurement of exposure, outcomes and confounders                                                                                                                                                                                                                                                                                                                                                      | Findings or Results                                                                                                                                                                                                                                                                                                                                                                                                                                                                                     | Comments                                                                                                                                                                                                                               |
|----|---------------------------------------------------------------------------------------------------------------------|-------------------------------------------------------------------------------------------------------------------------------------------------------------------------------------------------------------------------------------------------|---------------------------------------------------------------------------------------------------------------------------------------------------------------|--------------------------------------------------------------------------------------------------------------------------------------------------------------------------------------------------------------------------------------------------------------------------------------------------------------------------------------------------------------------------------------------------------|---------------------------------------------------------------------------------------------------------------------------------------------------------------------------------------------------------------------------------------------------------------------------------------------------------------------------------------------------------------------------------------------------------------------------------------------------------------------------------------------------------|----------------------------------------------------------------------------------------------------------------------------------------------------------------------------------------------------------------------------------------|
| 70 | Lagergren et al. 2000[65]<br><br>Snuff, defined as taking a quid of snuff at least once a week for 6 months or more | Whole of Sweden, except those >80 and individuals born abroad. All patients with a new diagnosis of AC of oesophagus or gastric cardia and half with oesophageal SCC (born on even dates). Controls were selected from the population, 1995-97. | 618 patients, 189 oesophageal ACC, 262 cardia AC, 167 oesophageal SCC, 820 controls. 35 oeso AC cases, 53 gastric cardia AC, 33 oesophageal SCC, 126 controls | Snuff use clearly defined & includes trend information.<br><br>Outcomes clearly defined, and 97% confirmed by biopsies and / or re-examination of surgical specimens by a pathologist.<br><br>Many potential confounders considered (age, sex, education, cigarette smoking, alcohol consumption, dietary intakes of fruit and vegetables and energy intake, BMI, reflux symptoms, physical activity). | Snuff users had OR of 1.2 (95% CI 0.7 to 2.0) for oesophageal AC compared with never users. No trend found for duration of use (in years) or intensity (number of quids per week). Results similar for gastric cardia AC (OR=1.2, 95% CI 0.8 to 1.8). For oesophageal SCC, adjusted OR of 1.4 (95% CI 0.9 to 2.3). No apparent dose-response but point estimates of borderline significance observed in single high-dose or long-duration categories e.g. 15-35 quids/week, (OR = 2.1, 95% 1.0 to 4.4). | Very good study – Encompasses whole population of Sweden, and uses population controls, randomly selected from age and sex strata. Response rates were good (between 73% and 87% for each cancer type and controls).<br><br>Quality: A |

| ID | Study and type of ST                              | Subjects, Setting and years of recruitment                                                                                                                       | Sample size and No of ST users                                                                                                                                                                                                               | Measurement of exposure, outcomes and confounders                                                                                                                                                                                                                                                                                                                                                                                                | Findings or Results                                                                                                                                                                                                                                                                                                                                                                                                                                                                                                                                                                                                                                                                                                                                                                                                                     | Comments                                                                                                                                                                                                                                                                                                                                                                                                                                                                                                          |
|----|---------------------------------------------------|------------------------------------------------------------------------------------------------------------------------------------------------------------------|----------------------------------------------------------------------------------------------------------------------------------------------------------------------------------------------------------------------------------------------|--------------------------------------------------------------------------------------------------------------------------------------------------------------------------------------------------------------------------------------------------------------------------------------------------------------------------------------------------------------------------------------------------------------------------------------------------|-----------------------------------------------------------------------------------------------------------------------------------------------------------------------------------------------------------------------------------------------------------------------------------------------------------------------------------------------------------------------------------------------------------------------------------------------------------------------------------------------------------------------------------------------------------------------------------------------------------------------------------------------------------------------------------------------------------------------------------------------------------------------------------------------------------------------------------------|-------------------------------------------------------------------------------------------------------------------------------------------------------------------------------------------------------------------------------------------------------------------------------------------------------------------------------------------------------------------------------------------------------------------------------------------------------------------------------------------------------------------|
| 71 | Ye 1999[66]<br><br>Chewing tobacco and oral snuff | Gastric cancer cases and population controls from 5 counties with different incidence rates of gastric cancer in Northern and Central Sweden included, 1989-1995 | 567 gastric ca cases and 1534 controls. Only 8 cases and 14 controls reported having ever chewed tobacco, and none of the females had ever used moist snuff. 83 of the male cases (375) and 192 of the male controls (779) were snuff users. | Use of ST was defined as at least once a week for 6 months or more. Snuff dipping was analysed in detail as age at starting, duration of use, times per day (dose response).<br><br>Gastric ca were analysed in the study: Cardia ca and distal stomach ca (intestinal type-diffuse type), defined histologically and according to locality.<br><br>Main confounders adjusted in multivariate models (age, residence area, BMI, SES and smoking) | OR of snuff dipping for <u>cardia ca</u><br><br>Never users OR = Ref<br>Ex user OR = 0.8, (95% CI 0.3-1.9), current users OR = 0.5, (95% CI 0.2-1.0), Ever users OR = 0.6, 95% CI 0.3-1.2. No statistically significant trends were found for age at starting use, duration of use in years, or number of times used per day.<br><br>OR of snuff dipping for distal stomach ca <u>intestinal</u> type<br>Ex-user OR = 0.9 95% CI 0.5-1.6, Current user OR= 0.8, 95% CI 0.5-1.3, ever users 0.8, 95% CI 0.5-1.2). Again, no statistically significant dose-response relationships observed.<br><br>OR of snuff dipping for distal stomach ca <u>diffuse</u> type<br>Ex-users, OR 0.7, 95% CI 0.3-1.6, current user 0.6, 95% CI 0.3-1.2, ever users 0.7, 95% CI 0.4-1.2.<br><br>No statistically significant dose-response relationships. | Controls were selected from the population register. Only 8 cases and 14 controls reported having ever chewed tobacco, and none of the females had ever used moist snuff. Therefore analysis of the effect of ST use was restricted to snuff use among males.<br><br>Joint effect of smoking and snuff dipping analysed and presented for total gastric and cardia ca. 28 (3.1%) of the cases and 245 (16%) of the controls refused to participate. Their smoking and ST use habits may differ.<br><br>Quality: A |

| <b>ID</b> | <b>Study and type of ST</b>                                | <b>Subjects, Setting and years of recruitment</b>                                                                                                                                                                                                                                                 | <b>Sample size and No of ST users</b>                                                      | <b>Measurement of exposure, outcomes and confounders</b>                                                                                                                                                    | <b>Findings or Results</b>                                                                                                                                      | <b>Comments</b>                                                                                                                                                                                                                                                                             |
|-----------|------------------------------------------------------------|---------------------------------------------------------------------------------------------------------------------------------------------------------------------------------------------------------------------------------------------------------------------------------------------------|--------------------------------------------------------------------------------------------|-------------------------------------------------------------------------------------------------------------------------------------------------------------------------------------------------------------|-----------------------------------------------------------------------------------------------------------------------------------------------------------------|---------------------------------------------------------------------------------------------------------------------------------------------------------------------------------------------------------------------------------------------------------------------------------------------|
| 72        | McLaughlin 1995[145]<br><br>Chewing tobacco and oral snuff | A multicentre case control study based in Sydney, Berlin, Heidelberg, Uppsala, Minnesota, & Denmark. The study was planned to explore tobacco and renal cell ca relation. Four of the 6 centres obtained the cases from the cancer registers. Controls were selected from the population. 1989-91 | 1723 renal cell cases (adenoma) and 2309 controls.<br><br>11 cases and 13 controls used ST | Cases obtained from cancer registries.<br><br>ST use was not defined in terms of frequency.<br><br>Results adjusted for age, sex, centre and BMI. Unclear how many ST users used only this tobacco product. | The OR of ST vs no tobacco use for renal cell ca was 1.3, (95% CI 0.6 to 3.1).<br><br>No interaction observed between ST and cigarette smoking.                 | Very few cases or controls used ST. Unclear whether these are also exclusive ST users, or whether they smoke cigarettes too, and whether analyses were adjusted for cigarette smoking.<br><br>Quality: F                                                                                    |
| 73        | Hansson 1994[66]<br><br>Oral snuff                         | Histologically confirmed incident gastric cancer cases and population controls were selected from low gastric ca counties and 2 high gastric ca counties in Sweden, 1989-92.                                                                                                                      | 338 gastric ca cases and 679 controls. No of ST users not given.                           | ST use not defined or described.<br><br>Histologically confirmed incident gastric cancer cases.<br><br>Adjusted for age, gender, SES, vegetable intake and other tobacco use.                               | There was no statistically significant association between gastric ca and snuff dipping (OR=0.7; 95% CI, 0.47 to 1.06 after adjustment in a multivariate model. | Population controls were used. Non-response rate was higher in controls. The number of snuff dipping cases and controls was not presented in this study. It was stated that the number of chewing tobacco users was too small to allow any reliable statistical analysis.<br><br>Quality: F |

## Asian Studies

### Case-control studies:

| ID | Study and type of ST                                                                                                                                               | Subjects, Setting and years of recruitment                                                                                                                                                                      | Sample size and No of ST users                                           | Measurement of exposure, outcomes and confounders                                                                                                                                                                                         | Findings or Results                                                                                                                                                                                                                                                                                                                                                                                                                                                                                                                                                                                                                                                                                                                        | Comments                                                                                                     |
|----|--------------------------------------------------------------------------------------------------------------------------------------------------------------------|-----------------------------------------------------------------------------------------------------------------------------------------------------------------------------------------------------------------|--------------------------------------------------------------------------|-------------------------------------------------------------------------------------------------------------------------------------------------------------------------------------------------------------------------------------------|--------------------------------------------------------------------------------------------------------------------------------------------------------------------------------------------------------------------------------------------------------------------------------------------------------------------------------------------------------------------------------------------------------------------------------------------------------------------------------------------------------------------------------------------------------------------------------------------------------------------------------------------------------------------------------------------------------------------------------------------|--------------------------------------------------------------------------------------------------------------|
| 74 | Phukan et al. 2001[69]<br><br>Chewing of several different types of betel (red, green and fermented) with or without tobacco, also chewing tobacco alone (chardha) | Cancer of oesophagus presenting at Dr. Bhubaneswar Barooah Cancer Institute in Guwahati, Assam. Controls were matched on age and sex, and chosen from those accompanying patients.<br><br>July 1997 – June 1998 | 502 cases, 1004 controls<br><br>Tobacco chewers: 438 cases, 592 controls | Description of types of betel and tobacco very clear and detailed.<br><br>Cancer of oesophagus, site not stated.<br><br>Major confounders were considered (smoking, alcohol consumption) but unclear whether matching taken into account. | Highest risks for men chewing betel nut and tobacco when unfermented betel nut was used (OR= 7.1, 95% CI 3.5 to 6.7 (error in original paper)). Chewing 'Zarda' (finely cut, scented tobacco) and dried tobacco alone also has significantly raised risk. Clear trends in dose-response relationships observed for men and women, including frequency of use per day, duration of use in years, age at starting and spitting versus keeping in mouth. For example, the OR associated with chewing for over 20 years was 10.6 (95% CI 5.6 to 17.3) in men and 7.2 (95% CI 2.6 to 14.2) in women, compared with (OR=1.8 95% CI 0.09 to 7.1) and (OR=1.2 95% CI 0.07 to 5.2) for men and women who had chewed for under 10 years respectively | Inclusions and exclusions clearly defined.<br><br>Evidence of dose-response relationships.<br><br>Quality: A |

| ID | Study and type of ST                                                                               | Subjects, Setting and years of recruitment                          | Sample size and No of ST users                                                                        | Measurement of exposure, outcomes and confounders                                                                                                                                                                                                                                                                                                                         | Findings or Results                                                                                             | Comments                                                                                                                                                                                                                                                                                                                                                                       |
|----|----------------------------------------------------------------------------------------------------|---------------------------------------------------------------------|-------------------------------------------------------------------------------------------------------|---------------------------------------------------------------------------------------------------------------------------------------------------------------------------------------------------------------------------------------------------------------------------------------------------------------------------------------------------------------------------|-----------------------------------------------------------------------------------------------------------------|--------------------------------------------------------------------------------------------------------------------------------------------------------------------------------------------------------------------------------------------------------------------------------------------------------------------------------------------------------------------------------|
| 75 | Dikshit and Kanhere 2000[52]<br>Tobacco quid chewing, no further details<br><br>Same study as ID24 | Bhopal Population-Based Cancer Registry, Bhopal, India<br>1986-1992 | 247<br><br>163 lung cases, 260 controls<br><br>52 tobacco quid chewers among lung cases, 108 controls | No clear definitions of ST use, but detailed trend information reported.<br><br>Sites included clearly defined using ICD-O codes, histologically confirmed.<br><br>Controls for age, sex, education, religion and cigarette smoking (but does not specify how variables were measured or adjusted for). Stated that risk estimates could not be adjusted for alcohol use. | No association between tobacco quid chewing and lung ca (OR= 0.7, 95% CI 0.4 to 1.2) compared with non-chewers. | Information on controls collected from a separate survey of 2500 males in Bhopal – based on a random sample of voter list of Bhopal cancer registry, 1989-1992. Response rates unclear – cases for which detailed information about smoking or chewing history was unavailable or cases registered from death certificates were excluded (unclear how many).<br><br>Quality: A |

| ID | Study and type of ST                         | Subjects, Setting and years of recruitment                                                                                                                                                                                                                                                                                               | Sample size and No of ST users                                     | Measurement of exposure, outcomes and confounders                                                                                                                                                                                                                                                                                                                                                         | Findings or Results                                                                                                                                                                                                                                                                                                                                                                                                                                                                                                                                                                                                                                                                                                                             | Comments                                                                                                                                                                                                                                                                                                                                                                                                                                        |
|----|----------------------------------------------|------------------------------------------------------------------------------------------------------------------------------------------------------------------------------------------------------------------------------------------------------------------------------------------------------------------------------------------|--------------------------------------------------------------------|-----------------------------------------------------------------------------------------------------------------------------------------------------------------------------------------------------------------------------------------------------------------------------------------------------------------------------------------------------------------------------------------------------------|-------------------------------------------------------------------------------------------------------------------------------------------------------------------------------------------------------------------------------------------------------------------------------------------------------------------------------------------------------------------------------------------------------------------------------------------------------------------------------------------------------------------------------------------------------------------------------------------------------------------------------------------------------------------------------------------------------------------------------------------------|-------------------------------------------------------------------------------------------------------------------------------------------------------------------------------------------------------------------------------------------------------------------------------------------------------------------------------------------------------------------------------------------------------------------------------------------------|
| 76 | Nandakumar et al 1996[70]<br>Chewing tobacco | Patients with oesophageal cancer registered in Bangalore population based cancer registry, Kidwai Memorial Institute of Oncology. Controls patients who attended the same Institute during same time period, but proved not to have cancer. Randomly selected and matched on sex, age, area of residence, calendar time<br><br>1982-1985 | 343 cases, 686 controls<br>79 cases and 96 controls chewed tobacco | No clear definition, but some description of types of ST used and trend information.<br><br>Outcome of interest, portion of oesophagus affected (upper, middle, or lower third), type of cancer all clearly stated. Most cases confirmed microscopically (78%).<br><br>Many potential confounders were considered and controlled (including bidi and cigarette smoking, alcohol and non-tobacco chewing). | Chewing with or without tobacco was associated with an elevated risk of oesophageal cancer in both males (OR=2.1, 95% CI 1.2 to 3.8) and females (OR = 2.2, 95% CI 1.4 to 3.3). Most dose-response variables (duration in years and number of times chewed per day) did not show a trend with increased risk except for the period of time that the quid was retained in the mouth (OR = 3.9, 95% CI 1.9 to 7.9 for over 30 minutes, compared with (OR=1.3, 95% CI 0.8 to 2.1) for under 5 minutes. After adjusting for alcohol, (OR = 4.3 95% CI 1.6 to 11.6) in non-smokers (10 ca, 16 co). The risk was highest for the lower third of oesophagus (OR = 6.6, 95% CI 2.1 to 21.2), and not statistically significant for the other locations. | Information was collected by the registry for cases and controls. Possible response bias, only 62.5% of patients were interviewed for the study.<br><br>In adjusted analyses, there was little difference between the risks associated with tobacco chewing (OR = 2.9, 95% CI 1.5 to 5.4), and chewing paan only (OR = 2.8, 95% CI 1.5 to 5.2).<br><br>Use of snuff was not a significant factor for either males or females.<br><br>Quality: A |

| ID | Study and type of ST                                  | Subjects, Setting and years of recruitment                                                                                                                                                          | Sample size and No of ST users                                                                                                  | Measurement of exposure, outcomes and confounders                                                                                                                                                                                          | Findings or Results                                                                                                                                                                                                                                                                                                                                                                                      | Comments                                                                                                                                                                                                                                                                                          |
|----|-------------------------------------------------------|-----------------------------------------------------------------------------------------------------------------------------------------------------------------------------------------------------|---------------------------------------------------------------------------------------------------------------------------------|--------------------------------------------------------------------------------------------------------------------------------------------------------------------------------------------------------------------------------------------|----------------------------------------------------------------------------------------------------------------------------------------------------------------------------------------------------------------------------------------------------------------------------------------------------------------------------------------------------------------------------------------------------------|---------------------------------------------------------------------------------------------------------------------------------------------------------------------------------------------------------------------------------------------------------------------------------------------------|
| 77 | Harish 1995[67]<br><br>Chewing tobacco and oral snuff | Penile cancer cases diagnosed in Cancer Institute of Madras and age matched controls. Controls were selected among the partners of breast ca patients.<br><br>Madras Cancer Inst., India 1960-1990. | 503 penile ca cases 503 controls.<br><br>171 cases and 78 controls used chewing tobacco/ and 27 cases and 8 controls used snuff | Not clearly defined, but included chewing tobacco, areca nut, snuff use, and years of use.<br><br>Dose response relation was studied between chewing tobacco and cancer.<br><br>Controlled for age by matching, also smoking and phimosis. | OR of chewing tobacco for penile carcinoma was 3.11 (95% CI 2.21 to 4.37). A dose-response relationship was observed for less than ten years of chewing, OR was 1.76 (95% CI 0.95 to 3.28). For over ten years, OR was 3.62 (95% CI 2.48 to 5.27).<br><br>After adjusting for smoking and phimosis: OR for Chewing tobacco was 4.08 (95% CI 2.73 to 6.12) and OR for snuff use 4.23 (95% 1.59 to 11.26). | The study was designed specifically to analyse the association between smoking, chewing tobacco, snuff use and penile ca.<br><br>Quality: A                                                                                                                                                       |
| 78 | Notani 1993[146]<br><br>Chewing tobacco               | Not clear whether the cases are incident or prevalent. Two control groups (hospital and population). Maharashtra, India. 1986-90.                                                                   | 246 lung cases, 153 bladder cases and 212 controls<br><br>Number of ST users not stated                                         | ST use is not defined and validated.<br><br>Cases histologically confirmed (98%).<br><br>States that controls were similar to cases in 5-year age group, mother tongue, and socio-economic status. Adjusted for age and smoking.           | No statistically significant relationship with lung or bladder cancers.<br><br>OR of chewing tobacco use for lung ca (compared to population controls) =0.80 (95% CI 0.5 to 1.4) And for bladder ca=0.45 (95% CI 0.3 to 0.8)                                                                                                                                                                             | This study was planned to evaluate the association between occupation and lung and bladder ca; ST use was not main focus. No. of ST users was not stated, only ORs presented. No information given about non-response in cases or controls.<br><br>The study included only men.<br><br>Quality: F |

| ID | Study and type of ST                                                | Subjects, Setting and years of recruitment                                                                                                                                         | Sample size and No of ST users                                                                                                   | Measurement of exposure, outcomes and confounders                                                                                                                                                                                                                           | Findings or Results                                                                                                                                                                                                                                                                                                                                                    | Comments                                                                                                                                                                                                                                                               |
|----|---------------------------------------------------------------------|------------------------------------------------------------------------------------------------------------------------------------------------------------------------------------|----------------------------------------------------------------------------------------------------------------------------------|-----------------------------------------------------------------------------------------------------------------------------------------------------------------------------------------------------------------------------------------------------------------------------|------------------------------------------------------------------------------------------------------------------------------------------------------------------------------------------------------------------------------------------------------------------------------------------------------------------------------------------------------------------------|------------------------------------------------------------------------------------------------------------------------------------------------------------------------------------------------------------------------------------------------------------------------|
| 79 | Sankaranarayanan et al. 1991[13]<br>Chewing betel, defined in paper | Patients with oesophageal cancers at the Regional Cancer Centre Trivandrum, Kerala, India. For selection of controls see Sankaranarayanan et al. 1989[11] (ID 30)<br><br>1983-1984 | 267 cases 895 controls<br><br>67 cases, 181 controls<br>chewed pan-tobacco,<br><br>7 cases and 7 controls<br>inhaled nasal snuff | ST use defined in paper, and trend information available.<br><br>Sites included not clearly stated, most (67%) confirmed histologically.<br><br>Control of confounding good (duration of bidi smoking, daily frequency of bidi and cigarette smoking, alcohol consumption). | No significant effects associated with taking snuff or pan-tobacco chewing, and no dose-response effects when looking at duration of use in years or frequency per day. However, starting use after age 21 has much reduced risk compared with starting earlier (OR = 0.21), and significant risk found with occasional use (OR= 10.18 in males, 95% CI 3.6 to 28.74). | Absence of effect attributed to confounding with bidi smoking (though no effect also found in females, for whom the only prevalent tobacco habit was pan-tobacco chewing), or to habit of spitting out quid and its extracts rather than swallowing.<br><br>Quality: A |

| ID | Study and type of ST                                                    | Subjects, Setting and years of recruitment                                                                                                                                                                                    | Sample size and No of ST users                                                                                                    | Measurement of exposure, outcomes and confounders                                                                                                                                                              | Findings or Results                                                                                                                                                                                                                                                                                                                                                                                                  | Comments                                                                                                                                                                                                               |
|----|-------------------------------------------------------------------------|-------------------------------------------------------------------------------------------------------------------------------------------------------------------------------------------------------------------------------|-----------------------------------------------------------------------------------------------------------------------------------|----------------------------------------------------------------------------------------------------------------------------------------------------------------------------------------------------------------|----------------------------------------------------------------------------------------------------------------------------------------------------------------------------------------------------------------------------------------------------------------------------------------------------------------------------------------------------------------------------------------------------------------------|------------------------------------------------------------------------------------------------------------------------------------------------------------------------------------------------------------------------|
| 80 | Sankaranarayanan et al. 1990[50]<br><br>Chewing betel, defined in paper | Patients with biopsy-proven carcinoma of larynx at the Regional Cancer Centre and Medical College Hospital, Trivandrum, Kerala, India. For selection of controls see Sankaranarayanan et al. 1989[11]. (ID 30)<br><br>1983-84 | 191 cases, 549 controls<br><br>50 cases, 181 controls<br>chewed pan-tobacco,<br><br>6 cases and 7 controls<br>inhaled nasal snuff | ST use defined in paper, and trend information available.<br><br>Site included clearly defined (ICD-O 161), all biopsy-proven, SCC carcinoma<br><br>Control of confounding good (age and religion, see ID 30). | No statistically significant association, e.g. OR for chewing 10+ pieces / day (OR = 0.73, 95% CI 0.36 to 1.46) compared with never users. However, risk is much lower for those who adopt habit after age 21, than for those who start chewing younger (OR = 0.14, 95% CI 0.07 to 0.24). High risks also observed for occasional users (OR= 13.74, 95% CI 4.92 to 38.34). Snuff use OR = 2.82 (95% CI 0.9 to 8.73). | Lack of effect attributed to confounding with bidi smoking, a stronger risk factor for cancer of larynx. Those who chewed were also more likely to smoke, but consumed fewer bidis than non-chewers.<br><br>Quality: A |

| ID | Study and type of ST        | Subjects, Setting and years of recruitment                                                                                              | Sample size and No of ST users                                                                                                                                                                                                                      | Measurement of exposure, outcomes and confounders                                                                                                                                                                                                                                                                     | Findings or Results                                                                                                                                                                                                                                                                                                                                                                                                                                              | Comments                                                                                                                                                                                                                                                                                        |
|----|-----------------------------|-----------------------------------------------------------------------------------------------------------------------------------------|-----------------------------------------------------------------------------------------------------------------------------------------------------------------------------------------------------------------------------------------------------|-----------------------------------------------------------------------------------------------------------------------------------------------------------------------------------------------------------------------------------------------------------------------------------------------------------------------|------------------------------------------------------------------------------------------------------------------------------------------------------------------------------------------------------------------------------------------------------------------------------------------------------------------------------------------------------------------------------------------------------------------------------------------------------------------|-------------------------------------------------------------------------------------------------------------------------------------------------------------------------------------------------------------------------------------------------------------------------------------------------|
| 81 | Simarak 1977[68]<br><br>Pan | Hospital based oral-<br>oropharynx, larynx-<br>hypopharynx, lung<br>cancer cases and<br>hospital controls,<br>Thailand.<br><br>1971-72. | 88 oral-<br>oropharynx,<br>96 larynx-hypo<br>pharynx, 115<br>lung cancer<br>cases and<br>1113 controls.<br>66 of oral<br>cancer cases,<br>65 of the<br>larynx cases,<br>38 of the lung<br>cases and 517<br>of the controls<br>were betel<br>chewers | For ST use the<br>duration of<br>consumption and<br>frequency is not<br>available.<br><br>Definition of cases<br>provided, histological<br>confirmation was<br>obtained for only half<br>of the lung cancer<br>cases.<br><br>Main confounders<br>were controlled for<br>either by<br>stratification or in a<br>model. | Age and province adjusted OR<br>Lung cancers:<br>OR 0.60 (men), 0.73 (women)<br><br>Age and province adjusted OR<br>of betel chewing for larynx ca:<br>OR= 2.71*** (just for<br>men)<br>Age, province, school<br>attendance, agricultural<br>employment, rural residence,<br>yaamuan smoking, miang#<br>chewing adjusted:<br>OR= 2.36**<br><br>*:p<0.05 **:p<0.01<br>***:p<0.001 #:yaamuan<br>smoking: a kind of cigar<br>miang chewing: doesn't have<br>tobacco | The aim of the study was to<br>investigate the association<br>between 3 cancer outcomes<br>with smoking, chewing and<br>drinking habits. The cases<br>were selected from University<br>hospital and the controls from<br>radiology department, i.e. not<br>from the same pop.<br><br>Quality: A |

**All-cause mortality**

**Asian Studies  
Prospective cohorts**

| <b>ID</b> | <b>Study and<br/>type of ST</b> | <b>Subjects,<br/>Setting and<br/>years of<br/>recruitment</b> | <b>Sample<br/>size and<br/>No of ST<br/>users</b> | <b>Measurement of<br/>exposure, outcomes<br/>and confounders</b> | <b>Findings or Results</b> | <b>Comments</b> |
|-----------|---------------------------------|---------------------------------------------------------------|---------------------------------------------------|------------------------------------------------------------------|----------------------------|-----------------|
|-----------|---------------------------------|---------------------------------------------------------------|---------------------------------------------------|------------------------------------------------------------------|----------------------------|-----------------|

| ID | Study and type of ST                              | Subjects, Setting and years of recruitment                                                                                              | Sample size and No of ST users                                                                                                                                                                                | Measurement of exposure, outcomes and confounders                                                                                                                                                                                              | Findings or Results                                                                                                                                                                                                                                                                                                                                                                                                                                                                                                                                                                                                                                                                       | Comments                                                                                                                                                                                                                             |
|----|---------------------------------------------------|-----------------------------------------------------------------------------------------------------------------------------------------|---------------------------------------------------------------------------------------------------------------------------------------------------------------------------------------------------------------|------------------------------------------------------------------------------------------------------------------------------------------------------------------------------------------------------------------------------------------------|-------------------------------------------------------------------------------------------------------------------------------------------------------------------------------------------------------------------------------------------------------------------------------------------------------------------------------------------------------------------------------------------------------------------------------------------------------------------------------------------------------------------------------------------------------------------------------------------------------------------------------------------------------------------------------------------|--------------------------------------------------------------------------------------------------------------------------------------------------------------------------------------------------------------------------------------|
| 82 | Gupta 2000[72]<br><br>Bidi, mishri, betel chewing | People over 35 yrs interviewed for tobacco habits and followed up for 5-6 years. Mumbai City centre (pop: 3,418,089), India, 1991-1994. | 52,568 people included.<br><br>Women: 64,414 person years (py) non tobacco users, 114,980 py ST users and 511 py of smokers<br><br>Men: 27,236 py non tobacco users, 57,890 py ST users and 28,338 py smokers | ST users did not use other tobacco forms. Dose-response relationship was analysed for bidi, mishri and betel quid chewing.<br><br>Mortality information obtained by active follow-up.<br><br>Adjustments for age and smoking (by restriction). | <b>Among women</b> , RR ST use vs no tobacco= 1.35.<br><b>Among men</b> , RR ST use vs no tobacco= 1.22<br><b>For women:</b><br><b>Mishri users:</b><br>RR mishri vs no tobacco use = 1.24<br><b>Betel quid:</b><br>RR betel vs no tobacco use = 1.19.<br>RR betel frequency vs no tobacco use:<br>1-5 times a day: 1.10, 6 or more times a day: 1.49<br><b>For men:</b><br><b>Mishri users:</b><br>RR mishri vs no tobacco use = 1.06<br>RR mishri vs no tobacco use:<br>1-5 times a day: 1.08, 6 or more times a day: 1.13<br><b>Betel quid:</b><br>RR betel vs no tobacco use = 1.11.<br>RR betel frequency vs no tobacco use:<br>1-5 times a day: 1.05<br>6 or more times a day: 1.16 | The study was designed to analyse all cause mortality and tobacco use. People over 35 yrs followed up for 5-6 years. Response rate of eligible individuals is 50% (low) & loss to follow-up 26%. 95% CI not given.<br><br>Quality: A |

| ID | Study and type of ST      | Subjects, Setting and years of recruitment                                                                                                | Sample size and No of ST users                                                                                 | Measurement of exposure, outcomes and confounders                                                                                                                                                                                                                         | Findings or Results                                                                                                                                                                                                               | Comments                                                                                                                                                                                                                                     |
|----|---------------------------|-------------------------------------------------------------------------------------------------------------------------------------------|----------------------------------------------------------------------------------------------------------------|---------------------------------------------------------------------------------------------------------------------------------------------------------------------------------------------------------------------------------------------------------------------------|-----------------------------------------------------------------------------------------------------------------------------------------------------------------------------------------------------------------------------------|----------------------------------------------------------------------------------------------------------------------------------------------------------------------------------------------------------------------------------------------|
| 83 | Gupta 1984[71]<br><br>Pan | People over 15 years interviewed for tobacco habits and followed up for 10 years. Ernakulam District, India. Interview date is not clear. | 10,287 people over 15. 637 men and 2026 women used chewing tobacco. 1081 men and 27 of women had mixed habits. | Deaths ascertained through household interviews.<br><br>Chewing tobacco was defined clearly whether current or lifetime. Dose response relation was not studied.<br><br>Basic confounders age and sex were controlled either in multivariable analyses or stratification. | Age adjusted RR for all cause mortality (reference group 'no tobacco habit'):<br><br>Men<br>Women<br>Chewing habit = 1.2 1.3*<br>Mixed habit = 1.4* 1.7<br><br>Confidence limits are not provided<br>*: Statistically significant | People over 15 years interviewed for tobacco habits and followed up for 10 years. No information about loss to follow-up. The study has large numbers of tobacco chewers and participants with several tobacco use habits.<br><br>Quality: A |

| ID | Study and type of ST                  | Subjects, Setting and years of recruitment                                                                                                    | Sample size and No of ST users                                     | Measurement of exposure, outcomes and confounders                                                                                   | Findings or Results                                                                                                                                                                                                                                                                                                       | Comments                                                                                                                                                                                                                                                                                                                                                                                                                                                             |
|----|---------------------------------------|-----------------------------------------------------------------------------------------------------------------------------------------------|--------------------------------------------------------------------|-------------------------------------------------------------------------------------------------------------------------------------|---------------------------------------------------------------------------------------------------------------------------------------------------------------------------------------------------------------------------------------------------------------------------------------------------------------------------|----------------------------------------------------------------------------------------------------------------------------------------------------------------------------------------------------------------------------------------------------------------------------------------------------------------------------------------------------------------------------------------------------------------------------------------------------------------------|
| 84 | Gupta 1980[56]<br><br>Tobacco chewing | Oral leukoplakia cases and sex, age, tobacco habit matched healthy controls recruited (1968-71) and followed up. Maharashtra District, India. | 101,761.<br><br>1860 of leukoplakia<br>8526 of controls<br>used CT | Tobacco chewing, described in paper.<br><br>All-cause mortality follow-up for 8 years.<br><br>Controls for age and sex by matching. | Among the controls:<br>Age adjusted annual death rates<br>Among smokers= 47/1000<br>Among chewers=29/1000<br>RR smk v chewers=1.6 *1.6<br><br>Among the leukoplakia cases:<br>Age adjusted annual death rates<br>Among smokers= 75/1000<br>Among chewers=39/1000<br>RR smokers v chewers =2.1 *1.9<br><br>*: Age adjusted | Oral leukoplakia cases and sex, age, tobacco habit matched healthy controls selected. It is not clear how many of them were followed up (only person years presented). All cause mortality compared between smokers and tobacco chewers within two groups.<br><br>Females excluded because they rarely practised smoking. The reference group for chewing tobacco is smokers rather than non-tobacco users. No confidence limits provided for RRs.<br><br>Quality: A |

## Cardiovascular Disease

### Scandinavian Studies Prospective cohort

| ID | Study and type of ST                             | Subjects, Setting and years of recruitment                       | Sample size and No of ST users                                                                                                               | Measurement of exposure, outcomes and confounders                                                                                                                                                                                                                                                                    | Findings or Results                                                                                                                                                                                                                                                                                                                                                                                                                                                                                                                                       | Comments                                                                                                                                                                                                                                                                                                                                                                                                                                                                                                                                                                                               |
|----|--------------------------------------------------|------------------------------------------------------------------|----------------------------------------------------------------------------------------------------------------------------------------------|----------------------------------------------------------------------------------------------------------------------------------------------------------------------------------------------------------------------------------------------------------------------------------------------------------------------|-----------------------------------------------------------------------------------------------------------------------------------------------------------------------------------------------------------------------------------------------------------------------------------------------------------------------------------------------------------------------------------------------------------------------------------------------------------------------------------------------------------------------------------------------------------|--------------------------------------------------------------------------------------------------------------------------------------------------------------------------------------------------------------------------------------------------------------------------------------------------------------------------------------------------------------------------------------------------------------------------------------------------------------------------------------------------------------------------------------------------------------------------------------------------------|
| 85 | Bolinder 1994[64]<br><br>Smokeless tobacco users | Swedish construction workers who had health check-ups in 1971-74 | 135,036 male workers.<br>Women (less than 0.05%) were excluded.<br>1672 of those aged 35-54 years and 1734 of 55-65 years olds were ST users | ST use was defined as present ST usage reducing misclassification. Nonusers in this study had never used any tobacco.<br><br>Outcomes clearly defined with ICD codes.<br><br>Most of CVD risk factors adjusted for ST-outcome association except cholesterol and alcohol use. Also age and regional origin adjusted. | Age group 35-54<br>RR of ST use for IHD: RR=2.0, (95% CI 1.49 to 2.9)<br>Stroke: RR=1.9 (95% CI 0.6 to 5.7).<br>All CVD: RR=2.1 (95% CI 1.5 to 2.9).<br>All cancer: RR=1.2 (95% CI 0.8 to 1.9).<br>All cause RR=1.9 ( 95% CI 1.6 to 2.4).<br><br>Age group 55-65<br>adjusted RR of ST use for IHD: RR=1.2 (95% CI 1.0 to 1.5).<br>Stroke: RR=1.2 (95% CI 0.7 to 1.8)<br>All CVD: RR=1.1 (95% CI 1.0 to 1.4).<br>All cancer: RR=1.0 (95% CI 0.8 to 1.3).<br>All cause RR=1.2 (95% CI 1.0 to 1.3)<br><br>*Reference category is male never users of tobacco | 25% of the workers did not come for checkups, the reason is not clear. Statistical power of the study is high (in total 6297 users of ST were followed up and 172 IHD deaths occurred in this group). Healthy worker effect may play a role in ST CVD mortality association.<br><br>When potential confounding due to age, area of domicile, BMI, blood pressure, diabetes and history of heart symptoms or blood pressure medication at the time of entering the study was analysed according to Mantel Haenzel procedure, the RR of death from CVD remained essentially unchanged.<br><br>Quality: A |

### Case-Control Studies

| ID | Study and type of ST                  | Subjects, Setting and years of recruitment                              | Sample size and No of ST users                                                                                                                                                                                                    | Measurement of exposure, outcomes and confounders                                                                                                                                                                                                                              | Findings or Results                                                                                                                                                                                                                                                                                                                                                                                                                                                                                                                           | Comments                                                                                                                                                                                                                                                                                                                                                                  |
|----|---------------------------------------|-------------------------------------------------------------------------|-----------------------------------------------------------------------------------------------------------------------------------------------------------------------------------------------------------------------------------|--------------------------------------------------------------------------------------------------------------------------------------------------------------------------------------------------------------------------------------------------------------------------------|-----------------------------------------------------------------------------------------------------------------------------------------------------------------------------------------------------------------------------------------------------------------------------------------------------------------------------------------------------------------------------------------------------------------------------------------------------------------------------------------------------------------------------------------------|---------------------------------------------------------------------------------------------------------------------------------------------------------------------------------------------------------------------------------------------------------------------------------------------------------------------------------------------------------------------------|
| 86 | Huhtasaari 1992[73]<br><br>Oral snuff | First MI cases and population controls from Northern Sweden, 1989-1991. | 585 cases (first MI) and 589 controls. 59 cases and 87 controls were regular snuff dippers. 32 cases and 31 controls were concomitant smokers and snuff users. Confounders adjusted for: smoking, low level of education, and age | ST was defined clearly (at least once daily), and dose response relation was analysed.<br><br>Outcomes clearly defined (MONICA protocol)<br><br>Blood pressure, cholesterol and diabetes prevalence were similar in cases and controls so they were not included in the model. | Age adj. OR of snuff dipping v no tobacco for MI:<br>35-54 yrs: OR=0.96 (95% CI 0.56 to 1.67)<br>55-64 yrs: OR=1.24 (95% CI 0.67 to 2.30)<br>All ages: OR=0.89 (95% 0.62 to 1.29)<br>Snuff dippers had no increased risk of MI compared to non-tobacco users.<br><br>Snuff<br><=2 cans weekly OR= 0.63 (95% CI 0.41 to 0.98)<br>>3 more cans weekly OR=0.93 (95% CI 0.61 to 1.41)<br><br>In a logistic regression model for MI, with smoking, snuff dipping, low level of education and age as predictors, snuff dipping was not significant. | The study was planned within Northern Sweden MONICA project. Cases were identified according to MONICA protocol. Controls were selected from population and they were only group matched. Response rate in controls was 81.6%. A telephone survey conducted to check non-participants smoking habits found them to be similar to those of participants.<br><br>Quality: A |

| ID | Study and type of ST                                                                        | Subjects, Setting and years of recruitment                              | Sample size and No of ST users                                                                                                                                                                                                                                                                                                         | Measurement of exposure, outcomes and confounders                                                                                                                                                                                                                                                                                                                                                                                                                             | Findings or Results                                                                                                                                                                                                                                                                                                                                                                                                                                                                                                                                     | Comments                                                                                                                                                                                                                                                                                                                                                                                                                                                                                                                                                                                                      |
|----|---------------------------------------------------------------------------------------------|-------------------------------------------------------------------------|----------------------------------------------------------------------------------------------------------------------------------------------------------------------------------------------------------------------------------------------------------------------------------------------------------------------------------------|-------------------------------------------------------------------------------------------------------------------------------------------------------------------------------------------------------------------------------------------------------------------------------------------------------------------------------------------------------------------------------------------------------------------------------------------------------------------------------|---------------------------------------------------------------------------------------------------------------------------------------------------------------------------------------------------------------------------------------------------------------------------------------------------------------------------------------------------------------------------------------------------------------------------------------------------------------------------------------------------------------------------------------------------------|---------------------------------------------------------------------------------------------------------------------------------------------------------------------------------------------------------------------------------------------------------------------------------------------------------------------------------------------------------------------------------------------------------------------------------------------------------------------------------------------------------------------------------------------------------------------------------------------------------------|
| 87 | Huhtasaari 1999[74]<br><br>Oral snuff<br><br>From same study as Huhtasaari 1992 (see ID85). | First MI cases and population controls from Northern Sweden, 1991-1993. | 687 first MI men cases and 687 matched controls from same county. The cases were MONICA Sweden project.<br><br>59 cases and 90 controls were current snuff users and –non current smokers; 20 cases and 11 controls were both smokers and snuff users. 11 of the cases and 13 of the controls were former snuff users but non-smokers. | Detailed information about ST (present use, previous use, amount, type of preparation, age of onset and whether or not snuffing was associated with quitting smoking) obtained. Median consumption of snuff was 2 boxes per week in both cases and controls.<br><br>Outcomes clearly defined (MONICA protocol)<br><br>Confounders adjusted for include hypertension, low level of education, not being married or co-habitant, diabetes, known high cholesterol and heredity. | OR for different combinations of snuff user for MI:<br>Current snuff user-non smoker: 0.96 (95% CI 0.65 to 1.41)<br>Current smoker, no current snuff use: 3.65 (2.67-4.99)<br>Current snuff user and smoker: 2.66 (95% CI 1.24 to 5.71)<br>Former snuff user, never smoked: 1.23 (95% CI 0.54 to 2.82)<br>Former snuff user former smoker: 0.99 (95% CI 0.62 to 1.59)<br><br>In conditional regression model: adjusted OR of snuff use for all MI: 0.58 (95% CI 0.35 to 0.94).<br><br>Adjusted OR of snuff use for fatal MI: 1.50 (95% CI 0.45 to 5.03) | Of the original set of case-controls 21.8% were excluded because of missing smoking information. This was common amongst the fatal case pairs. To check the validity of ST information obtained from spouses of fatal MI cases, spouses of surviving cases were interviewed by telephone 2 months later. The agreement was high for snuff use (98%). Information on duration of use was not high quality. Median age of starting snuff was 31.5 years explained by the fact that many had started snuff in conjunction with quitting smoking. Proper statistical analyses were carried out.<br><br>Quality: A |

### Cross Sectional Study

| ID | Study and type of ST                                                                    | Subjects, Setting and years of recruitment              | Sample size and No of ST users                                                                                                                   | Measurement of exposure, outcomes and confounders                                                                                                               | Findings or Results                                                                                                                                                                                                                                                                                                                                                                                                                                                                                                                                                                                   | Comments                                                                                                                                                                                                                                                                                                                                                                                                     |
|----|-----------------------------------------------------------------------------------------|---------------------------------------------------------|--------------------------------------------------------------------------------------------------------------------------------------------------|-----------------------------------------------------------------------------------------------------------------------------------------------------------------|-------------------------------------------------------------------------------------------------------------------------------------------------------------------------------------------------------------------------------------------------------------------------------------------------------------------------------------------------------------------------------------------------------------------------------------------------------------------------------------------------------------------------------------------------------------------------------------------------------|--------------------------------------------------------------------------------------------------------------------------------------------------------------------------------------------------------------------------------------------------------------------------------------------------------------------------------------------------------------------------------------------------------------|
| 88 | Bolinder 1992[38]<br><br>Oral snuff<br><br>From same study as Bolinder 1994 see (ID 84) | 16-65 years old Swedish construction workers, 1971-1974 | 97,586 construction workers who had voluntary health checkups.<br><br>5014 of the participants were ST users who had never been regular smokers. | ST users were daily users.<br><br>Confounding: persons who had mixed tobacco habits were excluded from the analyses to increase validity, also adjusted for age | Reason for disability pension among 46-55 year olds:<br>OR of ST use vs nonusers for CVD diagnosis=1.6 (95% CI 0.7 to 3.5)<br>for Hypertension: 3.0 (95% CI 1.9 to 4.9)<br><br>Among 56-65 year olds:<br>OR of ST use vs nonusers for CVD diagnosis 1.5 (95% CI 1.1 to 1.9)<br><br>Age adjusted RR of 'frequent sick leave' (1 day or more for 4 times or more per year) for all kind of diagnosis was 1.1 (95% CI 1.0 to 1.2) for ST users compared to non-users.<br>Age adjusted RR 'Longer sick leave' ( $\geq 30$ days in a year) was 1.2 (95% CI 1.1 to 1.2) for ST users compared to non-users. | The aim of the study was to evaluate ST effect on blood pressure and other health hazards. In this cross sectional study, reference group was those who had never used any tobacco form. The outcomes were questionnaire reported symptoms, physical examination and disability pension due to cardiovascular and musculoskeletal diagnoses.<br><br>Healthy worker effect highly possible.<br><br>Quality: A |

## Dental Diseases

### US Cross-sectional studies

| ID | Study<br>Type of ST                                                                                                                                                     | Subjects,<br>Setting and<br>years of<br>recruitment                                                                                                                                       | Sample size<br>No. of ST<br>users                                                             | Measurement of<br>exposure, outcomes and<br>confounders                                                                                                                                                                                                                                                                                                                                                                           | Findings or Results                                                                                                                                                                                                                                                                                                                                                                                                                                                                                                                                                                                                                                                                                                                                                                                                                                                                                                                                                                             | Comments                                                                                                                                                                   |
|----|-------------------------------------------------------------------------------------------------------------------------------------------------------------------------|-------------------------------------------------------------------------------------------------------------------------------------------------------------------------------------------|-----------------------------------------------------------------------------------------------|-----------------------------------------------------------------------------------------------------------------------------------------------------------------------------------------------------------------------------------------------------------------------------------------------------------------------------------------------------------------------------------------------------------------------------------|-------------------------------------------------------------------------------------------------------------------------------------------------------------------------------------------------------------------------------------------------------------------------------------------------------------------------------------------------------------------------------------------------------------------------------------------------------------------------------------------------------------------------------------------------------------------------------------------------------------------------------------------------------------------------------------------------------------------------------------------------------------------------------------------------------------------------------------------------------------------------------------------------------------------------------------------------------------------------------------------------|----------------------------------------------------------------------------------------------------------------------------------------------------------------------------|
| 89 | Tomar and<br>Winn,<br>1999[76]<br><br>Chewing<br>tobacco and<br>oral snuff,<br>users defined<br>as those who<br>said they used<br>substances at<br>time of<br>interview | Dentate adults<br>(>18) who had<br>completed<br>clinical data on<br>dental caries<br>and self-<br>reported data on<br>tobacco use as<br>part of NHANES<br>III <sup>4</sup><br>1988 – 1994 | 14,807<br><br>Approx. 444<br>ST users, of<br>whom 252<br>chewed<br>tobacco, 180<br>used snuff | ST use clearly defined.<br><br>Outcomes clearly described –<br>trained dental examiners<br>scored all teeth and tooth<br>surfaces using specific<br>criteria for coronal and root-<br>surface caries.<br><br>Some confounders<br>considered (age, ethnicity,<br>education, and visited dentist<br>in last year), but other<br>important confounders (such<br>as diet, oral hygiene, brand<br>of chewing tobacco) not<br>included. | After adjusting for age and race, men<br>who used only chewing tobacco had<br>slightly higher mean number of teeth<br>than those who used snuff or<br>smoked cigarettes. However, mean<br>DFT, DFS and RDFS <sup>5</sup> significantly<br>higher for men using chewing<br>tobacco. Significant dose-response<br>relationships with frequency of use<br>per week and years of use and RDFS<br>e.g. (OR = 1.26, 95% CI 0.56 to<br>2.80) for 1-10 years of use,<br>(OR=2.55, 95% CI 0.93 to 7.04) for<br>36 or more years of use. OR less<br>than 1 package per week (OR =<br>0.97, 95% CI 0.43 to 2.17), 5 or<br>more packages per week (OR= 4.35,<br>95% CI 1.72 to 11.04). Snuff users<br>did not have significantly raised<br>RDFS. Those who reported placing<br>chewing tobacco on right side of<br>mouth tended to have slightly higher<br>mean number and %RDFS on right<br>posterior teeth than on left posterior<br>teeth and vice versa, but this was not<br>statistically significant. | Good study. Higher<br>risk for chewing<br>tobacco compared<br>with snuff attributed to<br>the addition of sugar<br>to many brands of<br>chewing tobacco.<br><br>Quality: A |

<sup>4</sup> NHANES III – a multipurpose health survey conducted in the US

| ID | Study Type of ST                                                                         | Subjects, Setting and years of recruitment     | Sample size No. of ST users                                                                     | Measurement of exposure, outcomes and confounders                                                                                                                                                                                                                                                                                                                                                                                                                                                                                                                       | Findings or Results                                                                                                                                                                                                                                                                       | Comments                                                      |
|----|------------------------------------------------------------------------------------------|------------------------------------------------|-------------------------------------------------------------------------------------------------|-------------------------------------------------------------------------------------------------------------------------------------------------------------------------------------------------------------------------------------------------------------------------------------------------------------------------------------------------------------------------------------------------------------------------------------------------------------------------------------------------------------------------------------------------------------------------|-------------------------------------------------------------------------------------------------------------------------------------------------------------------------------------------------------------------------------------------------------------------------------------------|---------------------------------------------------------------|
| 90 | Robertson et al 1990[147]<br><br>Snuff and chewing tobacco, defined as use in past month | Baseball players and coaches, Arizona, US 1988 | 1094<br><br>493 never users, 138 ex-users, 40 used within past month, 423 used within past week | ST use clearly defined, and Self-reported use of ST was validated biochemically.<br><br>Definitions of outcomes of interest described in detail (entire dentition, measurements on a subset of 12 teeth, presence of caries, restorations, stain, plaque index, gingival index, pocket depth, attachment loss, recession. Players asked not to discuss tobacco use with examiners and rinsed mouth before exam to ensure no traces of ST remained. 12 examiners calibrated with high agreement (average kappa never less than 0.75).<br><br>Confounders not considered. | Use of ST was not necessarily associated with the most severe forms of periodontal disease, but sites adjacent to mucosal lesions in ST users showed significantly greater recession and attachment loss than in sites not adjacent to lesions in users or comparable sites in non-users. | About 85% of players agreed to participate.<br><br>Quality: F |

---

<sup>5</sup> DFT = number of decayed, missing or filled teeth. DFS = decayed, missing or filled coronal tooth surfaces. RDFS = number of decayed or filled root surfaces.  
RDS = number of decayed root surfaces

| ID | Study Type of ST                                                                                                          | Subjects, Setting and years of recruitment                                                                                                                                   | Sample size No. of ST users                                                                 | Measurement of exposure, outcomes and confounders                                                                                                                                                                                                                                                                                                                                                                                                                                                                                                                    | Findings or Results                                                                                                                                                                                                                                                                                                                                                                                                                                                                                                                                                                                                                                                                                                                                            | Comments                                                                                                                                                                          |
|----|---------------------------------------------------------------------------------------------------------------------------|------------------------------------------------------------------------------------------------------------------------------------------------------------------------------|---------------------------------------------------------------------------------------------|----------------------------------------------------------------------------------------------------------------------------------------------------------------------------------------------------------------------------------------------------------------------------------------------------------------------------------------------------------------------------------------------------------------------------------------------------------------------------------------------------------------------------------------------------------------------|----------------------------------------------------------------------------------------------------------------------------------------------------------------------------------------------------------------------------------------------------------------------------------------------------------------------------------------------------------------------------------------------------------------------------------------------------------------------------------------------------------------------------------------------------------------------------------------------------------------------------------------------------------------------------------------------------------------------------------------------------------------|-----------------------------------------------------------------------------------------------------------------------------------------------------------------------------------|
| 91 | Ernster et al. 1990[78]<br><br>Chewing tobacco and snuff, 'non-users', 'former-users' and 'current users' clearly defined | Members of 7 major league professionals, baseball teams, and their associated minor league teams, players and coaching staff in greater Phoenix and Tucson, Arizona, US 1988 | 1109<br><br>463 current users, 423 within past week, 40 within past month, 138 former users | Use of ST clearly defined and validated biochemically (low serum cotinine level and normal serum thiocyanate levels were considered biochemical evidence of non-use of tobacco).<br><br>Dental outcomes clearly defined (e.g. recession is "displacement of gingival margin of at least 1mm apical to the cemento-enamel junction"), and clinical examination standardized and conducted by specially trained dentists.<br><br>Many potential confounders were considered including age, race, cigarette smoking, alcohol consumption, and dental hygiene practices. | No significant differences in dental caries, gingival bleeding, pocket depth of 4mm or more, or recession in at least one site of 12 teeth examined between ST users and non-users. Attachment loss of 4mm or more was more common in snuff users both with (32.0%) and without (33.6%) oral lesions than in nonusers (27.4%), $p < 0.05$ . No significant differences in percentage of facial surfaces of mandibular incisor teeth with visible plaque or gingival bleeding. Percentage of facial sites with gingival recession was greater in teeth adjacent to oral leukoplakias in both snuff and chewing users, and also in snuff users without leukoplakia (e.g. 13% for snuff users with oral leukoplakia at adjacent teeth, versus 4.4% for nonusers). | Agreement good, with average kappa never lower than 0.75. Participation rates were high (85% of team members). Examination carried out on a subset of 12 teeth.<br><br>Quality: A |

| ID | Study Type of ST                                                         | Subjects, Setting and years of recruitment                                                                                                      | Sample size No. of ST users                                     | Measurement of exposure, outcomes and confounders                                                                                                                                                                                                                                                                                  | Findings or Results                                                                                                                                                                                                                                                                                                                                                                                                                                                                                                                                                                                                                                                                                                                                                                                                         | Comments                                                                                                                                                                                                                                               |
|----|--------------------------------------------------------------------------|-------------------------------------------------------------------------------------------------------------------------------------------------|-----------------------------------------------------------------|------------------------------------------------------------------------------------------------------------------------------------------------------------------------------------------------------------------------------------------------------------------------------------------------------------------------------------|-----------------------------------------------------------------------------------------------------------------------------------------------------------------------------------------------------------------------------------------------------------------------------------------------------------------------------------------------------------------------------------------------------------------------------------------------------------------------------------------------------------------------------------------------------------------------------------------------------------------------------------------------------------------------------------------------------------------------------------------------------------------------------------------------------------------------------|--------------------------------------------------------------------------------------------------------------------------------------------------------------------------------------------------------------------------------------------------------|
| 92 | Offenbacher and Weathers, 1985[79]<br><br>Chewing tobacco and oral snuff | Adolescent males (mean age 13.8, range 10-17) in grammar and high schools in greater metropolitan region of Atlanta, US<br><br>Years not stated | 565<br><br>26 snuff only, 21 chewing only, 28 snuff and chewing | Information on frequency and duration of use and brand preference was collected, but not reported in the results in relation to risk.<br><br>Outcomes include gingivitis, gingival recession, mucosal pathology, caries and DMF index, but these are not clearly defined.<br><br>Potential confounders such as diet not considered | Overall, positive associations with ST use and gingival recession and mucosal pathology, but not with gingivitis (OR gingival recession 9.1, 95% CI 5.2 to 16.1), OR mucosal pathology (6.0, 95% CI 2.9 to 12.4), OR gingivitis = 0.8 (95% CI 0.4 to 1.4). In students free of gingivitis, ST was not associated with changes in prevalence of gingival recession, mucosal pathology, or mean DMF score (e.g. OR gingival recession in sub-population with gingivitis = 20.7, OR with non gingivitis = 1.13). In only 3 cases was gingival recession located in direct juxtaposition to preferred placement site. DMF score for 52 ST users with gingivitis was 4.35 (+-0.44) significantly higher than in non-users without gingivitis (2.69+-0.26), $p<0.001$ . Attributable risk of gingival recession for ST use is 30% | Prevalence of cigarette smoking was very low (n=8, 1.4%). Authors suggest that ST users may be more vigorous toothbrushers than users which causes gingival recession.<br><br>Research funded by Smokeless Tobacco Research Council.<br><br>Quality: A |

## Scandinavia

### Cross-sectional studies

| ID | Study Type of ST                                          | Subjects, Setting and Years of recruitment                                                                                     | Sample size No. of ST users                                         | Measurement of exposure, outcomes and confounders                                                                                                                                                                                                           | Findings or Results                                                                                                                                                                                                                    | comments                                                                                                                                                  |
|----|-----------------------------------------------------------|--------------------------------------------------------------------------------------------------------------------------------|---------------------------------------------------------------------|-------------------------------------------------------------------------------------------------------------------------------------------------------------------------------------------------------------------------------------------------------------|----------------------------------------------------------------------------------------------------------------------------------------------------------------------------------------------------------------------------------------|-----------------------------------------------------------------------------------------------------------------------------------------------------------|
| 93 | Johansson et al 1994[148]<br>Snuff – defined as daily use | Participants in MONICA surveys of northern Sweden – randomly selected 2000 individuals aged 25-64<br>Two surveys 1986 and 1990 | 3308 (1625 in 1986, 1583 in 1990)<br><br>No. of ST users not stated | Snuff use is not main focus of study, and limited information available – no dose-response relationship considered.<br><br>Dental status outcome (dentate or edentulous) clearly defined.<br><br>Unclear whether confounders adjusted for in this analysis. | Regular use of snuff did not differ between dentate and edentulous men and women                                                                                                                                                       | Overall response rates to MONICA survey high (81.3%) in 1986 and 79.2% in 1990. Also considered CHD risk factors in relation to ST use.<br><br>Quality: F |
| 94 | Hirsch et al 1991[80]<br>Snuff                            | Patients aged 14-19 attending yearly dental check-ups at 9 public dental clinics in Gothenburg<br><br>1986                     | 2145<br>197 used snuff                                              | ST use clearly defined.<br><br>Outcomes clearly defined.<br><br>Controls for cigarette smoking, but not other potential confounders such as diet, oral hygiene or fluoride exposure.                                                                        | Indices of DMFT <sup>6</sup> , DFSp <sup>7</sup> and DIP <sup>8</sup> were all higher in snuff-users compared with non-users of tobacco. Multiple regression showed positive correlation between DMFT and years of snuff use (p<0.05). | Very high response rate (99%).<br><br>Quality: A                                                                                                          |

<sup>6</sup> DMFT – Decayed missing and filled teeth

<sup>7</sup> DFSp – Decayed filled proximal surfaces

<sup>8</sup> Dip – Initially decayed proximal surfaces i.e. number of proximal surfaces with caries lesions within the enamel

| ID | Study Type of ST                 | Subjects, Setting and Years of recruitment                                                            | Sample size No. of ST users           | Measurement of exposure, outcomes and confounders                                                                                                                                                                                                                                                                                                                                                                                                                                                                                                                                                                                                   | Findings or Results                                                                                                                                                                                                                                           | comments                                                                                                                                                                                                                                                                    |
|----|----------------------------------|-------------------------------------------------------------------------------------------------------|---------------------------------------|-----------------------------------------------------------------------------------------------------------------------------------------------------------------------------------------------------------------------------------------------------------------------------------------------------------------------------------------------------------------------------------------------------------------------------------------------------------------------------------------------------------------------------------------------------------------------------------------------------------------------------------------------------|---------------------------------------------------------------------------------------------------------------------------------------------------------------------------------------------------------------------------------------------------------------|-----------------------------------------------------------------------------------------------------------------------------------------------------------------------------------------------------------------------------------------------------------------------------|
| 95 | Ekfeldt et al 1990[149]<br>Snuff | Jonköping, Sweden.<br>Dentate individuals who had reached age of 20, 30, 40, 50, 60, 70 or 80 in 1983 | 585<br><br>No. of ST users not stated | <p>ST use is not described in detail and no dose-response information is available.</p> <p>Outcome was degree of incisal / occlusal wear, scored from 0 (no wear or negligible wear of enamel to 3 (wear of the dentin up to more than one-third of the crown height; excessive wear of tooth restorative material or dental materials in crown and bridgework; more than one-third of the crown height).</p> <p>Many potential confounders were considered including age, sex, meals, meals containing juice, syrup or apple, bruxism, dry mouth, salivary secretion and buffer capacity (pH), smokers, trauma to jaw, no. of occluding teeth.</p> | Of variables included in linear regression model, beta coefficient for snuff use (yes/no) was $-0.487$ (i.e. snuff use increased score by 0.487) and including snuff use in the model explained a statistically significant additional 12% of the variability | <p>Main focus of study is to validate a tooth wear index, About 30% of sample excluded due to incomplete data or no incisal or occlusive wear.</p> <p>Significant predictors were number of teeth, sex, bruxism, age, snuff use, and buffer capacity.</p> <p>Quality: F</p> |

## Asian studies

### Cross-sectional

| ID | Study Type of ST                                      | Subjects, Setting and years of recruitment                             | Sample size No. of ST users  | Measurement of exposure, outcomes and confounders                                                                                                                     | Findings or Results                                                                                                                                                                                                                                                                                                                                                                                                    | Comments                                                                                                                                                       |
|----|-------------------------------------------------------|------------------------------------------------------------------------|------------------------------|-----------------------------------------------------------------------------------------------------------------------------------------------------------------------|------------------------------------------------------------------------------------------------------------------------------------------------------------------------------------------------------------------------------------------------------------------------------------------------------------------------------------------------------------------------------------------------------------------------|----------------------------------------------------------------------------------------------------------------------------------------------------------------|
| 96 | Doifode, 2000[150]<br><br>Paan tobacco, not described | 2 randomly selected areas, Naigpur, India<br><br>Date of study unclear | 5061<br>1023 chewed tobacco, | No definition of ST use or information on possible dose-response relationships.<br><br>Outcomes not clearly defined.<br><br>Potential confounders not controlled for. | Tobacco chewing significantly associated with dental caries (OR 1.32, 95% CI 1.15 to 1.52), periodontal diseases (OR = 1.67, 95% CI 1.45 to 1.92), dento-facial anomaly (malocclusion, overcrowding and spacing – (OR= 0.73 95% CI 0.61 to 0.86), opacities and enamel disorders (OR= 3.55, 95% CI 3.03 to 4.16), precancerous lesions OR 4.20, 95% CI 2.87 to 6.16) and carcinoma (OR= 15.85, 95% CI 1.69 to 372.66). | Large sample size. High response rate in area (97.5%).<br><br>Crude OR calculated in EPI-INFO. High risk for carcinoma based on only 1 case.<br><br>Quality: F |

| <b>ID</b> | <b>Study Type of ST</b>                     | <b>Subjects, Setting and years of recruitment</b>                           | <b>Sample size No. of ST users</b>                                                            | <b>Measurement of exposure, outcomes and confounders</b>                                                                                                                                                 | <b>Findings or Results</b>                                                                                                                                                                                            | <b>Comments</b>                                                                                                                                                                                                                                                                             |
|-----------|---------------------------------------------|-----------------------------------------------------------------------------|-----------------------------------------------------------------------------------------------|----------------------------------------------------------------------------------------------------------------------------------------------------------------------------------------------------------|-----------------------------------------------------------------------------------------------------------------------------------------------------------------------------------------------------------------------|---------------------------------------------------------------------------------------------------------------------------------------------------------------------------------------------------------------------------------------------------------------------------------------------|
| 97        | Moller et al. 1977[151]<br><br>Paan tobacco | Survey of adults over 15 in 2 villages in Central Java and Bali<br><br>1973 | 982<br><br>209 chewed betel, 591 non-chewers (data presumably missing for other 182 in study) | ST use described, but no information on possible dose-response relationships,<br><br>Outcomes clearly defined (dental caries, DMFS index, WHO classification).<br><br>No control of possible confounders | Strong negative correlation between prevalence of dental caries and betel chewing (i.e. chewing is protective). Statistically significant in almost all age groups in both regions. Few men chewed tobacco (only 32). | Presumably high levels of non-response among men who were working in fields far from villages. Tobacco mostly not included in betel quid, used only after quid has been chewed for some minutes or expectorated, and used to clean buccal surfaces of the anterior teeth.<br><br>Quality: F |

## Adverse Outcomes of Pregnancy

### Asian Studies

#### Case-control study

| ID | Study Type of ST                                                                                                                                       | Subjects, Setting and years of recruitment                            | Sample size No. of ST users           | Measurement of exposure, outcomes and confounders                                                                                                                        | Findings or Results                                                                                                                                                                                                                                                                                                                                                                                                  | Comments                                                                                                                                                                                                                                                                                                                                                                                                                                            |
|----|--------------------------------------------------------------------------------------------------------------------------------------------------------|-----------------------------------------------------------------------|---------------------------------------|--------------------------------------------------------------------------------------------------------------------------------------------------------------------------|----------------------------------------------------------------------------------------------------------------------------------------------------------------------------------------------------------------------------------------------------------------------------------------------------------------------------------------------------------------------------------------------------------------------|-----------------------------------------------------------------------------------------------------------------------------------------------------------------------------------------------------------------------------------------------------------------------------------------------------------------------------------------------------------------------------------------------------------------------------------------------------|
| 98 | Krishna, 1978[82]<br><br>Locally grown and cured tobacco, kept in mouth for around 8-10 hours per day. Wads weigh 6-10 grammes and are renewed hourly. | Pune Hospital, Maharashtra, Delhi, India.<br><br>June 1971 – May 1972 | 220 tobacco chewers, 1168 non-chewers | Clear description of tobacco chewing use.<br><br>Outcomes clearly described.<br><br>Confounders were not considered beyond looking for differences among several strata. | Stillbirth weight increased among chewers, and sex ratios showed a deficit of boy babies among chewers (98 boys born to 220 chewers; ratio of 80 per 100 compared with 609 to 1168 non-chewers, 108.5 per 100). Birthweight stratified by maternal weight, social class and gestation was approximately 100-200g less among chewers in each strata. This is partly explained by the shorter gestation among chewers. | Large sample size and few women were cigarette smokers (5 and these were excluded). Author argues that these effects are similar to, but greater than those associated with tobacco smoking. The magnitude of the effects is attributed to the frequent use (10 hours per day) of chewing tobacco in this population, which may provide continuously high nicotine levels compared with the more intermittent effects of smoking.<br><br>Quality: A |

## Additional References for Appendices

104. Zahm SH, Heineman EF, Vaught JB. Soft tissue sarcoma and tobacco use: data from a prospective cohort study of United States veterans. *Cancer Causes Control* 1992; **3**:371-6.
105. Bjelke, E. and Schuman, LM. Chewing of tobacco and use of snuff: relationships to cancer of the pancreas and other sites in two prospective studies. *Proceedings of the 13th International Congress on Cancer*. 1982.
106. Winn DM, Walrath J, Blot W *et al*. Chewing tobacco and snuff in relation to cause of death in a large prospective cohort [Abstract]. *Am J Epidemiol* 1982; **116**:567.
107. Blot WJ, McLaughlin JK, Winn DM *et al*. Smoking and drinking in relation to oral and pharyngeal cancer. *Cancer Res* 1988; **48**:3282-7.
108. Wynder EL, Kabat G, Rosenberg S *et al*. Oral cancer and mouthwash use. *J Natl Cancer Inst* 1983; **70**:255-60.
109. Williams RR, Horm JW. Association of cancer sites with tobacco and alcohol consumption and socioeconomic status of patients: interview study from the Third National Cancer Survey. *J Natl Cancer Inst* 1977; **58**:525-47.
110. Wynder EL, Stellman SD. Comparative epidemiology of tobacco-related cancers. *Cancer Res* 1977; **37**:4608-22.
111. Martinez I. Factors associated with cancers of the Esophagus, Mouth and Pharynx in Puerto Rico. *J Natl Cancer Inst* 1969; **42**:1069-94.
112. Vogler WR, Lloyd JW, Kilmore BK. A retrospective study of etiological factors in cancer of the mouth, pharynx and larynx. *Cancer* 1962; **15**:246-58.
113. Wynder EL, Bross IJ, Feldman R.M. A study of the etiological factors in cancer of the mouth. *Cancer* 1957; **10**:1300-23.
114. Bundgaard T, Bentzen SM, Wildt J. The prognostic effect of tobacco and alcohol consumption in intra-oral squamous cell carcinoma. *Eur J Cancer B Oral Oncol* **30B**:323-8.
115. Wynder EL, Hultberg S, Jacobsson F *et al*. Environmental factors in cancer of the upper alimentary tract. *Cancer* 1957; **10**:470-87.
116. Nandakumar A, Thimmasetty KT, Sreeramareddy NM *et al*. A population-based case-control investigation on cancers of the oral cavity in Bangalore, India. *Br J Cancer* 1990; **62**:847-51.

117. Chattopadhyay A. Epidemiologic study of oral cancer in eastern India. *Indian J Dermatol* 1989; **34**:59-65.
118. Notani PN, Jayant K. Role of diet in upper aerodigestive tract cancers. *Nutr Cancer* 1987; **10**:103-13.
119. Jussawalla DJ. Oesophageal cancer in India. *J Cancer Res Clin Oncol* 1981; **99**:29-33.
120. Krishnamurthy S, Shanta V. Studies in etiology of oral and pharyngeal cancers. In: Nieburgs HE, ed. *Prevention and Detection of Cancer. Part II Detection. Volume 2 Cancer Detection in Specific Sites*. New York: Marcel Dekker, Inc, 1976
121. Jussawalla DJ, Deshpande VA. Evaluation of cancer risk in tobacco chewers and smokers: an epidemiologic assessment. *Cancer* 1971; **28**:244-52.122.
122. Shanta V, Krishnamurthi S. Further study in aetiology of carcinomas of the upper alimentary tract. *Br J Cancer* 1963; **17**:3-23.
123. Sarma, S. N. A study into the incidence and etiology of cancer of the larynx and adjacent parts in Assam. *Indian J Med Res* 1958; **46**: 525-532.
124. Chakrabarti RN, Dutta K, Sikdar S *et al*. Smokeless tobacco and premalignant and malignant lesions of the oral cavity. *Indian J Med Sci* 1991; **45**:273-5.
125. van Wyk CW, Stander I, Padayachee A, *et al*. The areca nut chewing habit and oral squamous cell carcinoma in South African Indians. A retrospective study. *South African Medical Journal* 1993; **83**:425-9.
126. Franco EL, Kowalski LP, Oliveira BV *et al*. Risk factors for oral cancer in Brazil: a case-control study. *Int J Cancer* 1989; **43**:992-1000.
127. Cook-Mozaffari PJ, Azordegan F, Day NE *et al*. Oesophageal cancer studies in the Caspian Littoral of Iran: results of a case-control study. *Br J Cancer* 1979; **39**:293-309.
128. Whitaker CJ, Moss E, Lee WR *et al*. Oral and pharyngeal cancer in the North-west and West Yorkshire regions of England, and occupation. *British Journal of Industrial Medicine* 1979; **36**:292-8.
129. Salem G, Juhl R, Schiodt T. Oral malignant and premalignant changes in 'Shammah'-users from the Gizan region, Saudi Arabia. *Acta Odontol Scand* 1984; **42**:41-5.
130. Heineman EF, Zahm SH, McLaughlin JK *et al*. Increased risk of colorectal cancer among smokers: results of a 26-year follow-up of US veterans and a review. *Int J Cancer* 1994; **59**:728-38.

131. Zheng W, McLaughlin JK, Gridley G *et al.* A cohort study of smoking, alcohol consumption, and dietary factors for pancreatic cancer (United States). *Cancer Causes Control* 1993; **4**:477-82.
132. Heineman EF, Zahm SH, McLaughlin JK *et al.* A prospective study of tobacco use and multiple myeloma: evidence against an association. *Cancer Causes Control* 1992; **3**:31-6.
133. Kneller RW, McLaughlin JK, Bjelke E *et al.* A cohort study of stomach cancer in a high-risk American population. *Cancer* 1991; **68**:672-8.
134. Hsing AW, McLaughlin JK, Hrubec Z *et al.* Tobacco use and prostate cancer: 26-year follow-up of US veterans. *Am J Epidemiol* 1991; **133**:437-41.
135. Hsing AW, McLaughlin JK, Schuman LM *et al.* Diet, tobacco use, and fatal prostate cancer: results from the Lutheran Brotherhood Cohort Study. *Cancer Res* 1990; **50**:6836-40.
136. Brown LM, Gibson R, Blair A *et al.* Smoking and risk of leukemia. *Am J Epidemiol* 1992; **135**:763-8.
137. Brown LM, Everett GD, Gibson R *et al.* Smoking and risk of non-Hodgkin's lymphoma and multiple myeloma. *Cancer Causes Control* 1992; **3**:49-55.
138. Zahm SH, Blair A, Holmes FF *et al.* A case-control study of soft-tissue sarcoma. *Am J Epidemiol* 1989; **130**:665-74.
139. Burch JD, Rohan TE, Howe GR *et al.* Risk of bladder cancer by source and type of tobacco exposure: a case-control study. *Int J Cancer* 1989; **44**:622-8.
140. Hartge P, Hoover R, Kantor A. Bladder cancer risk and pipes, cigars, and smokeless tobacco. *Cancer* 1985; **55**:901-6.
141. Howe GR, Burch, JD, Miller AB *et al.* Tobacco use, occupation, various nutrients, and bladder cancer. *J Natl Cancer Inst* **64**: 701-13.
142. Cole P, Monson R, Haning H, Friedell G. Smoking and cancer of the lower urinary tract. *N Engl J Med* 1971; **284**:129-34.
143. Spangler JG, Michielutte R, Bell RA *et al.* Association between smokeless tobacco use and breast cancer among Native-American women in North Carolina. *Ethn Dis* 2001; **11**:36-43.
144. Sterling TD, Rosenbaum WL, Weinkam JJ. Analysis of the relationship between smokeless tobacco and cancer based on data from the National Mortality Followback Survey. *J Clin Epidemiol* 1992; **45**:223-31.

145. McLaughlin JK, Lindblad P, Mellemegaard A *et al.* International renal-cell cancer study. I. Tobacco use. *Int J Cancer* 1995; **60**:194-8.
146. Notani PN. Role of alcohol in cancers of the upper alimentary tract: use of models in risk assessment. *J Epidemiol Community Health* 1988; **42**:187-92.
147. Robertson PB, Walsh M, Greene J *et al.* Periodontal effects associated with the use of smokeless tobacco. *J Periodontol* 1990; **61**:438-43.
148. Johansson I, Tidehag P, Lundberg V *et al.* Dental status, diet and cardiovascular risk factors in middle-aged people in northern Sweden. *Comm Dent Oral Epidemiol* 1994; **22**:431-6.
149. Ekfeldt A, Hugoson A, Bergendal T *et al.* An individual tooth wear index and an analysis of factors correlated to incisal and occlusal wear in an adult Swedish population. *Acta Odontol Scand* 1990; **48**:343-9.
150. Doifode VV, Ambadekar NN, Lanewar AG. Assessment of oral health status and its association with some epidemiological factors in population of Nagpur, India. *Ind J Med Sci* 2000; **54**:261-9.
151. Moller IJ, Pindborg JJ, Effendi I. The relation between betel chewing and dental caries. *Scand J Dent Res* 1977; **85**:64-70.
